# Supplementary material for: 40 Ar ∕ 39 Ar age constraints on the formation of fluid-rich quartz veins from the NW Rhenohercynian zone (Rursee area, Germany)
Source: Copernicus journal article supplement (doi:10.5194/gchron-7-173-2025), 2025-05-15
Supplement: Supplementary file 1 [file gchron-7-173-2025-supplement.zip]

## Sheet: Rursee 1a BNV
Incremental Crushing			36Ar(a) [fA]	37Ar(ca) [fA]	38Ar(cl) [fA]	39Ar(k) [fA]	40Ar(r) [fA]	Age	± 2s	40Ar(r)	39Ar(k)	K/Ca	± 2s		Normal Isochron			39(k)/36(a)	± 2s	40(a+r)/36(a)	± 2s			r.i.		Inverse Isochron			39(k)/40(a+r)	± 2s	36(a)/40(a+r)	± 2s			r.i.		Relative Abundances			36Ar [fA]	%1s	37Ar [fA]	%1s	38Ar [fA]	%1s	39Ar [fA]	%1s	40Ar [fA]	%1s
								(Ma)		(%)	(%)
003_23CR01A	1		0.259179	0.0514666	0.00255495	0.00835072	52.6869	5733.46	319.667	40.5074	0.0655879	0.0697698	0.0733654		003_23CR01A	1		0.0322199	0.00566241	501.844	17.4254			0.162469		003_23CR01A	1		6.4203e-05	1.11404e-05	0.00199265	6.91905e-05			0.0355587		003_23CR01A	1		0.259194	1.57426	0.0514666	51.8612	0.0515114	1.42504	0.00838536	8.60658	130.068	0.73185
004_23CR01A	3		1.17425	0.185869	0.00675683	0.0461898	310.003	5841.79	68.7379	46.9284	0.362782	0.106858	0.028166		004_23CR01A	3		0.0393356	0.00147892	562.56	5.38487			0.19643		004_23CR01A	3		6.99224e-05	2.58223e-06	0.00177759	1.70152e-05			0.059215		004_23CR01A	3		1.1743	0.420375	0.185869	13.0511	0.228662	0.38652	0.0463149	1.82698	660.587	0.228759
005_23CR01A	5		1.48831	0.175516	0.0119792	0.0547334	376.392	5884.52	67.3297	45.86	0.429885	0.134092	0.0449614		005_23CR01A	5		0.0367756	0.0013549	551.459	4.52566			0.162938		005_23CR01A	5		6.66878e-05	2.42855e-06	0.00181337	1.48818e-05			0.0605131		005_23CR01A	5		1.48836	0.350932	0.175516	16.6673	0.293188	0.398677	0.0548515	1.80412	820.74	0.212632
013_23CR01A	7		2.17	0.227565	0.0128571	0.0805238	551.676	5877.93	51.4969	45.9902	0.632447	0.152155	0.0344033		013_23CR01A	7		0.0371077	0.00103958	552.788	2.89202			0.0953215		013_23CR01A	7		6.71283e-05	1.87993e-06	0.00180901	9.46419e-06			0.0914557		013_23CR01A	7		2.17007	0.186883	0.227565	11.2198	0.422878	0.179607	0.080677	1.38544	1199.55	0.183027
014_23CR01A	9		2.62233	0.279729	0.0169496	0.104749	792.327	6052.17	44.4395	50.2985	0.822716	0.16102	0.0314856		014_23CR01A	9		0.0399451	0.000961694	600.706	3.21019			0.120299		014_23CR01A	9		6.64969e-05	1.59763e-06	0.00166471	8.89623e-06			0.101882		014_23CR01A	9		2.62241	0.196702	0.279729	9.70451	0.512527	0.266335	0.104937	1.18533	1575.25	0.180838
016_23CR01A	11		3.27031	0.281711	0.0233192	0.122696	1087.83	6332.99	41.1698	52.6995	0.963677	0.187282	0.035237		016_23CR01A	11		0.0375183	0.000831625	631.198	3.29434			0.122053		016_23CR01A	11		5.94398e-05	1.31619e-06	0.00158429	8.26869e-06			0.113523		016_23CR01A	11		3.27039	0.187878	0.281711	9.34385	0.641258	0.140467	0.122886	1.09047	2064.21	0.181107
017_23CR01A	13		3.01942	0.319602	0.0259049	0.104125	928.926	6344	45.6787	50.7498	0.817812	0.140092	0.029875		017_23CR01A	13		0.034485	0.000849084	606.21	3.14594			0.101735		017_23CR01A	13		5.68862e-05	1.40172e-06	0.00164959	8.5606e-06			0.10895		017_23CR01A	13		3.01952	0.180267	0.319602	10.5929	0.596327	0.189628	0.10434	1.21511	1830.4	0.186627
019_23CR01A	17		3.22793	0.284661	0.0180923	0.114077	1077.43	6445.21	42.0777	52.7852	0.895975	0.17232	0.0331658		019_23CR01A	17		0.0353405	0.000800233	632.344	3.38772			0.12622		019_23CR01A	17		5.5888e-05	1.26313e-06	0.00158142	8.47228e-06			0.110585		019_23CR01A	17		3.22801	0.195646	0.284661	9.55847	0.627939	0.200506	0.114268	1.11316	2041.16	0.182961
020_23CR01A	21		2.98439	0.276583	0.0165357	0.106715	1034.61	6491.67	41.194	53.7284	0.838157	0.165909	0.0496613		020_23CR01A	21		0.0357578	0.000792773	645.233	3.3017			0.114626		020_23CR01A	21		5.54184e-05	1.22888e-06	0.00154983	7.93057e-06			0.116157		020_23CR01A	21		2.98447	0.180301	0.276583	14.9264	0.580385	0.14836	0.106901	1.09155	1925.63	0.181523
021_23CR01A	25		3.1971	0.277782	0.0275038	0.122193	1172.2	6472.86	38.8635	55.1175	0.959726	0.189152	0.0481114		021_23CR01A	25		0.0382201	0.000799146	665.204	3.39238			0.122449		021_23CR01A	25		5.74561e-05	1.20121e-06	0.0015033	7.66645e-06			0.121468		021_23CR01A	25		3.19718	0.180666	0.277782	12.6759	0.631637	0.239651	0.12238	1.02797	2126.72	0.179935
023_23CR01A	30		2.7762	0.243282	0.0212365	0.105134	1032.71	6514.95	43.0927	55.4752	0.825742	0.185824	0.0421302		023_23CR01A	30		0.0378699	0.000884623	670.548	3.57445			0.119261		023_23CR01A	30		5.6476e-05	1.3177e-06	0.00149132	7.94967e-06			0.109068		023_23CR01A	30		2.77627	0.192676	0.243282	11.2773	0.545824	0.211371	0.105298	1.15005	1861.58	0.184155
024_23CR01A	35		2.10086	0.221949	0.0176422	0.0864574	797.593	6403.45	47.6779	55.9783	0.67905	0.167501	0.0388618		024_23CR01A	35		0.0411533	0.00107704	678.211	4.12387			0.147888		024_23CR01A	35		6.06793e-05	1.57631e-06	0.00147447	8.96553e-06			0.0850759		024_23CR01A	35		2.10093	0.242553	0.221949	11.529	0.414701	0.211135	0.0866068	1.28352	1424.83	0.183292
025_23CR01A	40		1.89608	0.203408	0.0128933	0.0906124	719.551	6137.99	50.0516	55.9681	0.711685	0.191553	0.0617549		025_23CR01A	40		0.0477893	0.00132187	678.054	3.92468			0.125455		025_23CR01A	40		7.04802e-05	1.94099e-06	0.00147481	8.53643e-06			0.0841717		025_23CR01A	40		1.89614	0.224077	0.203408	16.0617	0.371402	0.227996	0.0907493	1.36247	1285.64	0.183148
027_23CR01A	50		1.93667	0.206476	0.0209217	0.102006	714.117	5915.91	42.0183	55.2581	0.80117	0.212434	0.0631518		027_23CR01A	50		0.0526708	0.00121304	667.294	3.7807			0.14221		027_23CR01A	50		7.89318e-05	1.80925e-06	0.00149859	8.49057e-06			0.10429		027_23CR01A	50		1.93673	0.215378	0.206476	14.8207	0.387219	0.288926	0.102145	1.12949	1292.33	0.18401
028_23CR01A	60		1.80272	0.226675	0.013924	0.126034	643.173	5363.91	35.0011	54.4419	0.989893	0.239085	0.0583306		028_23CR01A	60		0.0699133	0.00133218	655.339	3.56886			0.1524		028_23CR01A	60		0.000106683	2.02728e-06	0.00152593	8.30993e-06			0.133762		028_23CR01A	60		1.80279	0.198829	0.226675	12.1631	0.355264	0.187501	0.126187	0.930514	1181.39	0.186028
029_23CR01A	70		1.69018	0.224703	0.0153887	0.129184	617.535	5250.85	39.6529	55.0311	1.01463	0.247212	0.0537884		029_23CR01A	70		0.0764321	0.00168081	663.926	3.43246			0.114258		029_23CR01A	70		0.000115121	2.53358e-06	0.00150619	7.78693e-06			0.120743		029_23CR01A	70		1.69025	0.180203	0.224703	10.8248	0.335553	0.2125	0.129335	1.08334	1122.16	0.185325
031_23CR01A	80		1.63645	0.190348	0.0164904	0.168457	615.151	4789.76	29.7893	55.7338	1.32309	0.380547	0.111578		031_23CR01A	80		0.10294	0.00168861	674.465	3.97227			0.21694		031_23CR01A	80		0.000152625	2.46976e-06	0.00148266	8.73211e-06			0.144043		031_23CR01A	80		1.63651	0.228894	0.190348	14.6391	0.327001	0.379161	0.168585	0.786923	1103.73	0.185255
032_23CR01A	90		1.52648	0.202966	0.0086728	0.186485	559.996	4460.39	25.4418	55.1317	1.46468	0.395084	0.105402		032_23CR01A	90		0.122167	0.00168519	665.414	3.83771			0.244528		032_23CR01A	90		0.000183595	2.49469e-06	0.00150282	8.66739e-06			0.17621		032_23CR01A	90		1.52654	0.220523	0.202966	13.3231	0.298673	0.214013	0.186622	0.652949	1015.74	0.185803
033_23CR01A	100		1.35693	0.201873	0.0129979	0.212064	485.922	4014.46	25.1068	54.5338	1.66558	0.451706	0.124907		033_23CR01A	100		0.156282	0.00218158	656.664	4.24681			0.302443		033_23CR01A	100		0.000237994	3.21141e-06	0.00152285	9.84865e-06			0.166402		033_23CR01A	100		1.35699	0.261254	0.201873	13.811	0.271347	0.30381	0.2122	0.646744	891.048	0.190535
035_23CR01A	120		1.31607	0.208152	0.0116042	0.258131	479.282	3676.66	19.4606	54.9503	2.0274	0.533246	0.164363		035_23CR01A	120		0.196137	0.00204103	662.736	4.0467			0.3627		035_23CR01A	120		0.00029595	2.95179e-06	0.0015089	9.2134e-06			0.233783		035_23CR01A	120		1.31613	0.24002	0.208152	15.4046	0.26281	0.363512	0.258271	0.461306	872.21	0.188664
036_23CR01A	140		1.24641	0.144365	0.0114834	0.293325	443.526	3355.94	18.1838	54.3767	2.30382	0.873688	0.281753		036_23CR01A	140		0.235336	0.00229134	654.403	4.00208			0.385853		036_23CR01A	140		0.00035962	3.33978e-06	0.00152811	9.34533e-06			0.253988		036_23CR01A	140		1.24645	0.239654	0.144365	16.1188	0.249984	0.32243	0.293423	0.423567	815.654	0.189904
037_23CR01A	180		1.27532	0.172207	0.00825933	0.347557	460.18	3153.98	17.9899	54.722	2.72977	0.867851	0.231706		037_23CR01A	180		0.272525	0.00272727	659.394	4.1448			0.399764		037_23CR01A	180		0.000413296	3.90703e-06	0.00151654	9.53265e-06			0.241732		037_23CR01A	180		1.27537	0.250723	0.172207	13.3424	0.252867	0.280518	0.347673	0.43285	840.94	0.1895
039_23CR01A	230		1.42078	0.174645	0.0100847	0.450309	489.733	2863.54	15.3999	53.586	3.5368	1.10872	0.324596		039_23CR01A	230		0.316946	0.00256441	643.255	3.79444			0.430527		039_23CR01A	230		0.000492722	3.78995e-06	0.00155459	9.17028e-06			0.314024		039_23CR01A	230		1.42083	0.226641	0.174645	14.6345	0.283354	0.298444	0.450426	0.33499	913.92	0.188734
040_23CR01A	290		1.59156	0.196388	0.0111453	0.583056	558.546	2682.4	14.1509	54.0325	4.57941	1.27662	0.277878		040_23CR01A	290		0.366343	0.0026796	649.503	3.67754			0.426471		040_23CR01A	290		0.000564036	3.99773e-06	0.00153964	8.71757e-06			0.358744		040_23CR01A	290		1.59161	0.210125	0.196388	10.8792	0.318215	0.275975	0.583188	0.299251	1033.72	0.189716
041_23CR01A	370		1.66821	0.149197	0.0103438	0.671481	617.635	2625.46	12.5989	55.3587	5.27392	1.93527	0.796912		041_23CR01A	370		0.402516	0.00253278	668.798	3.58004			0.445828		041_23CR01A	370		0.000601849	3.72051e-06	0.00149522	8.00383e-06			0.412117		041_23CR01A	370		1.66826	0.193751	0.149197	20.5877	0.332933	0.25071	0.671582	0.247822	1115.7	0.184644
049_23CR01A	470		1.70834	0.161846	0.00958509	0.725659	616.034	2514.74	12.285	54.7062	5.69944	1.92797	0.650801		049_23CR01A	470		0.424773	0.00266279	659.163	3.65694			0.506108		049_23CR01A	470		0.000644413	3.80547e-06	0.00151707	8.41652e-06			0.402213		049_23CR01A	470		1.70839	0.209764	0.161846	16.8763	0.340396	0.232574	0.725768	0.232844	1126.08	0.181502
050_23CR01A	590		1.70216	0.156983	0.0131565	0.705961	575.537	2459.69	12.8244	53.1069	5.54473	1.93373	0.676297		050_23CR01A	590		0.414744	0.00278638	636.682	4.02			0.626028		050_23CR01A	590		0.000651415	3.67866e-06	0.00157064	9.91701e-06			0.373308		050_23CR01A	590		1.70221	0.257653	0.156983	17.4856	0.342563	0.324561	0.706066	0.215474	1083.73	0.182419
051_23CR01A	750		1.74508	0.168383	0.0139944	0.703242	605.366	2533.79	12.2317	53.7445	5.52338	1.79587	0.614694		051_23CR01A	750		0.402986	0.00241261	645.459	3.6497			0.557563		051_23CR01A	750		0.00062434	3.42337e-06	0.00154929	8.76033e-06			0.422454		051_23CR01A	750		1.74513	0.217218	0.168383	17.1129	0.351458	0.270069	0.703356	0.205906	1126.38	0.180955
053_23CR01A	200		0.912845	0.0939981	0.00814186	0.284899	311.039	2869.13	15.8475	53.2986	2.23764	1.30329	0.736728		053_23CR01A	200		0.3121	0.00266386	639.296	3.69529			0.400293		053_23CR01A	200		0.000488193	3.98901e-06	0.00156422	9.04158e-06			0.289272		053_23CR01A	200		0.912873	0.22219	0.0939981	28.2619	0.183663	0.268907	0.284962	0.364222	583.579	0.184813
054_23CR01A	350		1.64188	0.191136	0.0169843	0.509348	599.835	2979.69	14.0628	55.0289	4.0005	1.14588	0.32379		054_23CR01A	350		0.310223	0.00218156	663.894	3.4676			0.382307		054_23CR01A	350		0.000467277	3.25921e-06	0.00150626	7.8674e-06			0.363395		054_23CR01A	350		1.64194	0.187358	0.191136	14.1253	0.332647	0.317133	0.509477	0.297436	1090.03	0.181925
055_23CR01A	500		2.10549	0.212091	0.0151999	0.647843	798.642	3047.28	13.4966	55.9564	5.08826	1.31346	0.336261		055_23CR01A	500		0.307692	0.00202562	677.874	3.73564			0.465013		055_23CR01A	500		0.000453908	2.86961e-06	0.0014752	8.12957e-06			0.387458		055_23CR01A	500		2.10555	0.205361	0.212091	12.798	0.41993	0.307323	0.647985	0.257168	1427.26	0.183704
057_23CR01A	700		2.16145	0.221349	0.012433	0.771896	828.645	2844.77	12.1845	56.2186	6.0626	1.49951	0.333495		057_23CR01A	700		0.35712	0.00208342	681.934	3.65141			0.505015		057_23CR01A	700		0.000523686	2.92301e-06	0.00146642	7.85192e-06			0.431463		057_23CR01A	700		2.16151	0.198586	0.221349	11.1181	0.429214	0.253167	0.772045	0.213603	1473.97	0.179548
058_23CR01A	900		2.08613	0.209416	0.0132691	0.761202	845.424	2894.02	11.2612	57.58	5.9786	1.563	0.39097		058_23CR01A	900		0.364887	0.00188081	703.82	3.82903			0.597354		058_23CR01A	900		0.000518439	2.46812e-06	0.00142082	7.72977e-06			0.496001		058_23CR01A	900		2.08619	0.204635	0.209416	12.5061	0.415722	0.180026	0.761342	0.15662	1468.26	0.179209
059_23CR01A	250		0.347812	0.0639311	0.00369256	0.144527	136.485	2662.29	21.6585	56.7911	1.13514	0.972087	0.83873		059_23CR01A	250		0.415532	0.00599903	690.97	6.16267			0.483478		059_23CR01A	250		0.000601375	7.68881e-06	0.00144724	1.29078e-05			0.151651		059_23CR01A	250		0.34783	0.394477	0.0639311	43.1364	0.0710053	0.794747	0.14457	0.604194	240.328	0.207923
061_23CR01A	500		0.690241	0.0926037	0.0085465	0.276962	264.038	2675.58	17.4576	56.1644	2.17531	1.28606	0.956112		061_23CR01A	500		0.401255	0.00432217	681.09	4.23738			0.365426		061_23CR01A	500		0.000589136	6.05855e-06	0.00146823	9.13456e-06			0.222216		061_23CR01A	500		0.690269	0.247419	0.0926037	37.1691	0.142011	0.381221	0.277025	0.478199	470.117	0.18853
062_23CR01A	750		0.809454	0.102124	0.00665221	0.334323	324.433	2700.61	14.4787	57.3098	2.62583	1.40769	0.804857		062_23CR01A	750		0.413024	0.00349649	699.365	4.32098			0.466303		062_23CR01A	750		0.000590569	4.61477e-06	0.00142987	8.83434e-06			0.285496		062_23CR01A	750		0.809483	0.246918	0.102124	28.5857	0.163283	0.537959	0.334392	0.34367	566.104	0.18563
063_23CR01A	999		0.913576	0.120623	0.00654327	0.349403	369.842	2824.46	14.3551	57.5541	2.74427	1.24556	0.553557		063_23CR01A	999		0.382457	0.00309615	703.39	4.06462			0.425715		063_23CR01A	999		0.000543734	4.17997e-06	0.00142169	8.21539e-06			0.303385		063_23CR01A	999		0.91361	0.223122	0.120623	22.2186	0.182984	0.397164	0.349485	0.337597	642.6	0.183557
065_23CR01A	999		0.682638	0.0649666	0.0045698	0.23697	275.613	2961.4	17.5399	57.4887	1.8612	1.56845	1.52205		065_23CR01A	999		0.347138	0.00368129	702.308	4.74349			0.441342		065_23CR01A	999		0.000494282	4.81399e-06	0.00142388	9.61707e-06			0.212936		065_23CR01A	999		0.682657	0.281109	0.0649666	48.5188	0.136117	0.49144	0.237013	0.449405	479.422	0.18713
066_23CR01A	999		0.56189	0.0841093	0.00405404	0.184091	215.645	2971.87	19.3719	56.2449	1.44588	0.941146	0.59936		066_23CR01A	999		0.327628	0.0038353	682.344	4.65274			0.397528		066_23CR01A	999		0.000480151	5.2613e-06	0.00146554	9.99314e-06			0.197598		066_23CR01A	999		0.561914	0.281639	0.0841093	31.8379	0.1122	0.504556	0.184148	0.51284	383.403	0.192119
067_23CR01A	999		0.47734	0.0624959	0.00703425	0.138189	183.044	3154.61	23.011	56.2245	1.08535	0.9508	0.868059		067_23CR01A	999		0.289497	0.00405727	682.026	4.8135			0.347987		067_23CR01A	999		0.000424467	5.65333e-06	0.00146622	1.03481e-05			0.163728		067_23CR01A	999		0.477359	0.293327	0.0624959	45.6444	0.0986863	0.562732	0.138231	0.636045	325.558	0.196152
069_23CR01A	999		0.387231	0.064994	0.00325992	0.113398	150.976	3162.3	25.2579	56.6327	0.890644	0.750239	0.565048		069_23CR01A	999		0.292843	0.00457293	688.446	5.12092			0.334655		069_23CR01A	999		0.000425368	6.32976e-06	0.00145255	1.08046e-05			0.148684		069_23CR01A	999		0.387249	0.311717	0.064994	37.651	0.0776262	0.597737	0.113442	0.715427	266.588	0.20284
070_23CR01A	999		0.33944	0.0445463	0.00393536	0.103467	138.424	3169.6	28.5482	57.7327	0.812649	0.998758	1.2061		070_23CR01A	999		0.304818	0.00552912	706.362	5.86349			0.343025		070_23CR01A	999		0.000431532	7.4072e-06	0.00141571	1.17517e-05			0.121108		070_23CR01A	999		0.339453	0.35932	0.0445463	60.3742	0.0691728	0.797557	0.103497	0.832307	239.767	0.207702
071_23CR01A	999		0.338148	0.0663092	0.00452845	0.0900479	121.044	3176.75	33.1942	54.5239	0.70725	0.58394	0.434623		071_23CR01A	999		0.266297	0.00558295	656.521	5.81314			0.325317		071_23CR01A	999		0.000405619	8.0835e-06	0.00152318	1.34869e-05			0.10207		071_23CR01A	999		0.338167	0.388529	0.0663092	37.202	0.0693598	0.70818	0.0900925	0.972927	222.001	0.212198
073_23CR01A	999		0.262113	0.0386829	0.00283055	0.0781784	104.347	3166.08	34.5604	57.1441	0.614025	0.869033	1.39935		073_23CR01A	999		0.298262	0.00662521	696.661	6.65041			0.334323		073_23CR01A	999		0.000428131	9.00857e-06	0.00143542	1.37027e-05			0.100748		073_23CR01A	999		0.262124	0.420955	0.0386829	80.5051	0.0531856	0.799551	0.0782044	1.02707	182.604	0.224926
074_23CR01A	999		0.249555	0.0347784	0.00306995	0.0746043	95.3234	3100.6	35.8035	56.1286	0.585954	0.922406	1.26632		074_23CR01A	999		0.29895	0.00689043	680.534	6.50065			0.31761		074_23CR01A	999		0.000439287	9.6507e-06	0.00146943	1.40364e-05			0.101587		074_23CR01A	999		0.249565	0.418089	0.0347784	68.6341	0.0510144	0.810149	0.0746277	1.07336	169.83	0.230859
075_23CR01A	999	4	0.221871	0.0243733	0.00262085	0.0656608	83.6654	3096.49	42.924	55.8114	0.51571	1.1584	2.22436		075_23CR01A	999	4	0.295941	0.00834555	675.65	8.34634			0.369686		075_23CR01A	999	4	0.000438009	1.15078e-05	0.00148006	1.82832e-05			0.073379		075_23CR01A	999	4	0.221879	0.567386	0.0243733	96.0014	0.0452387	0.946053	0.0656772	1.29025	149.907	0.244005
082_23CR01A	999	4	0.193339	0.0254036	0.00180512	0.0568046	73.0039	3109.3	46.4205	55.8444	0.446152	0.961517	1.99123		082_23CR01A	999	4	0.293808	0.00891702	676.155	8.26699			0.330883		082_23CR01A	999	4	0.000434528	1.24811e-05	0.00147895	1.80824e-05			0.0760431		082_23CR01A	999	4	0.193347	0.554001	0.0254036	103.537	0.0389375	0.967232	0.0568217	1.41197	130.727	0.258386
083_23CR01A	999	4	0.183237	0.000213872	0.00142274	0.0543153	68.0567	3071.46	55.8143	55.4371	0.426601	109.204	24720.1		083_23CR01A	999	4	0.296422	0.0109508	669.975	9.02449			0.307499		083_23CR01A	999	4	0.000442437	1.55811e-05	0.00149259	2.01051e-05			0.0599131		083_23CR01A	999	4	0.183237	0.618489	0.000213872	11318.4	0.0366206	1.08812	0.0543155	1.74027	122.764	0.266554
084_23CR01A	999	4	0.17215	0.0348412	0.00162938	0.0523519	64.387	3043.81	44.3933	55.6096	0.41118	0.646112	0.868545		084_23CR01A	999	4	0.304107	0.00876396	672.577	7.63436			0.301105		084_23CR01A	999	4	0.000452152	1.24843e-05	0.00148682	1.68767e-05			0.0968257		084_23CR01A	999	4	0.172159	0.496186	0.0348412	67.1996	0.0347136	0.842642	0.0523753	1.35185	115.784	0.275436
086_23CR01A	999	4	0.159654	0.0339616	0.00165677	0.0461828	56.7367	3042.16	54.1327	54.3439	0.362727	0.584736	0.952784		086_23CR01A	999	4	0.289268	0.0103133	653.933	9.87366			0.360294		086_23CR01A	999	4	0.000442351	1.47457e-05	0.00152921	2.30894e-05			0.0675967		086_23CR01A	999	4	0.159664	0.69628	0.0339616	81.4548	0.0323108	1.08242	0.0462056	1.63972	104.403	0.291645
087_23CR01A	999	4	0.1846	0.00142836	0.0013437	0.0465801	55.1792	2988.36	52.58	50.0295	0.365848	14.0227	468.698		087_23CR01A	999	4	0.252331	0.00852903	597.473	6.62957			0.242758		087_23CR01A	999	4	0.00042233	1.39019e-05	0.00167372	1.85716e-05			0.0878127		087_23CR01A	999	4	0.1846	0.477081	0.00142836	1671.21	0.0367048	0.915848	0.0465811	1.62091	110.293	0.283167
088_23CR01A	999	4	0.153795	-0.00282228	0.00115225	0.0445898	50.5821	2924.84	58.9262	52.4171	0.350215	-6.79366	141.734		088_23CR01A	999	4	0.289929	0.0113654	627.452	11.0834			0.396292		088_23CR01A	999	4	0.000462074	1.66596e-05	0.00159375	2.8152e-05			0.0590544		088_23CR01A	999	4	0.153795	0.828251	-0.00282228	1043.13	0.0306826	1.56322	0.0445879	1.77595	96.4993	0.306632
090_23CR01A	999	4	0.130126	0.0463582	0.00183173	0.0420297	43.6812	2798.16	58.0974	52.9266	0.330108	0.389851	0.44932		090_23CR01A	999	4	0.322992	0.0125737	634.243	10.0421			0.331153		090_23CR01A	999	4	0.000509256	1.87661e-05	0.00157668	2.4964e-05			0.0798323		090_23CR01A	999	4	0.130139	0.71425	0.0463582	57.5987	0.0268695	1.28614	0.0420609	1.80878	82.5317	0.341243
091_23CR01A	999	4	0.130343	0.0291368	0.000719362	0.040443	43.639	2852.16	54.5663	52.8609	0.317645	0.596856	1.31747		091_23CR01A	999	4	0.31028	0.0111528	633.36	9.29147			0.32066		091_23CR01A	999	4	0.000489895	1.67501e-05	0.00157888	2.31624e-05			0.0919593		091_23CR01A	999	4	0.130351	0.650094	0.0291368	110.355	0.0257789	1.08935	0.0404626	1.67383	82.5544	0.33958
092_23CR01A	999	4	0.109301	0.060017	0.00205885	0.0369667	38.7478	2810.38	65.1205	54.2834	0.290343	0.264853	0.215104		092_23CR01A	999	4	0.338212	0.0148223	653.067	10.6707			0.293258		092_23CR01A	999	4	0.000517882	2.17736e-05	0.00153124	2.50195e-05			0.0829443		092_23CR01A	999	4	0.109317	0.724428	0.060017	40.5554	0.0231097	0.997627	0.0370071	2.06528	71.3806	0.377425
094_23CR01A	999	4	0.109159	0.0158328	0.00152801	0.0336886	35.0698	2800.51	66.0881	51.8321	0.264596	0.914945	3.06202		094_23CR01A	999	4	0.308619	0.0135472	619.832	11.1496			0.33186		094_23CR01A	999	4	0.000497908	2.06879e-05	0.00161334	2.90208e-05			0.0823257		094_23CR01A	999	4	0.109164	0.80932	0.0158328	167.321	0.0225125	1.38814	0.0336993	2.03879	67.6604	0.392205
095_23CR01A	999	4	0.10645	0.0319119	0.00147981	0.0346069	34.799	2751.02	66.1811	52.2659	0.271808	0.466314	0.738344		095_23CR01A	999	4	0.3251	0.0144541	625.465	12.0431			0.358684		095_23CR01A	999	4	0.000519774	2.16401e-05	0.00159881	3.07845e-05			0.0794397		095_23CR01A	999	4	0.106459	0.876058	0.0319119	79.1418	0.0219647	1.68673	0.0346284	2.04123	66.5807	0.399005
096_23CR01A	999	4	0.103797	0.0257598	0.00152324	0.0323568	32.6561	2756.25	67.7397	51.3092	0.254136	0.540121	1.28904		096_23CR01A	999	4	0.311732	0.0140533	613.175	11.9363			0.354817		096_23CR01A	999	4	0.00050839	2.15002e-05	0.00163085	3.17469e-05			0.0820708		096_23CR01A	999	4	0.103804	0.882196	0.0257598	119.311	0.0214808	1.23236	0.0323741	2.07212	63.6457	0.410989
098_23CR01A	999	4	0.0922237	-0.00077151	0.000644091	0.0311217	27.607	2575.14	70.1686	50.0659	0.244435	-17.3456	1233.39		098_23CR01A	999	4	0.337459	0.0159457	597.908	10.9383			0.288051		098_23CR01A	999	4	0.000564399	2.56752e-05	0.0016725	3.05972e-05			0.102947		098_23CR01A	999	4	0.0922237	0.788955	-0.00077151	3555.34	0.0184051	1.9412	0.0311212	2.22623	55.1413	0.462806
099_23CR01A	999	4	0.0891782	0.0404418	0.000872435	0.0294327	27.7448	2659.76	73.4448	51.0298	0.231169	0.312944	0.414201		099_23CR01A	999	4	0.330043	0.0162614	609.677	11.8334			0.30291		099_23CR01A	999	4	0.000541341	2.55347e-05	0.00164021	3.18354e-05			0.0950791		099_23CR01A	999	4	0.0891893	0.850848	0.0404418	66.1378	0.018039	2.08512	0.0294599	2.30893	54.3699	0.466495
100_23CR01A	999	4	0.0993547	0.0292533	0.00074967	0.0278612	27.0404	2700.78	81.2813	47.6872	0.218827	0.409537	0.682655		100_23CR01A	999	4	0.280422	0.0150576	570.721	11.5491			0.30166		100_23CR01A	999	4	0.000491347	2.52326e-05	0.00175217	3.54569e-05			0.0786312		100_23CR01A	999	4	0.0993627	0.905143	0.0292533	83.3063	0.0198154	2.05138	0.0278809	2.52513	56.7038	0.451977
102_23CR01A	999	4	0.0906922	0.0401182	0.0014728	0.0259145	23.9522	2632.22	88.9279	46.9382	0.203537	0.27776	0.348185		102_23CR01A	999	4	0.285741	0.0169442	562.665	11.9223			0.280358		102_23CR01A	999	4	0.000507835	2.89993e-05	0.00177726	3.76585e-05			0.0799262		102_23CR01A	999	4	0.0907035	0.938296	0.0401182	62.6143	0.0188821	1.9417	0.0259415	2.80884	51.0293	0.491703
103_23CR01A	999	4	0.0862986	0.0428697	0.000287648	0.0254295	22.8936	2595.61	87.2664	47.0491	0.199727	0.255068	0.339858		103_23CR01A	999	4	0.294669	0.0171919	563.843	11.0008			0.241972		103_23CR01A	999	4	0.000522608	2.97185e-05	0.00177354	3.46024e-05			0.0948356		103_23CR01A	999	4	0.08631	0.829657	0.0428697	66.5624	0.0168629	1.622	0.0254583	2.79246	48.6589	0.512877
104_23CR01A	999	4	0.0762124	0.02614	0.000418706	0.025726	21.4747	2491.76	84.5092	48.5538	0.202056	0.423189	0.726681		104_23CR01A	999	4	0.337557	0.0193336	580.335	12.7426			0.284907		104_23CR01A	999	4	0.000581659	3.21018e-05	0.00172314	3.78355e-05			0.102178		104_23CR01A	999	4	0.0762195	0.94632	0.02614	85.8151	0.0150963	1.96136	0.0257436	2.70035	44.2287	0.556377
106_23CR01A	999	4	0.0720228	-0.0162236	0.000802347	0.024806	20.4	2471.48	91.3727	48.6838	0.194831	-0.657475	1.90772		106_23CR01A	999	4	0.344419	0.0215644	581.804	13.2165			0.267229		106_23CR01A	999	4	0.000591985	3.58921e-05	0.00171879	3.90447e-05			0.0987117		106_23CR01A	999	4	0.0720188	0.974794	-0.0162236	145.049	0.014679	2.30649	0.0247951	2.97554	41.9032	0.582999
107_23CR01A	999	4	0.0743521	0.0300295	0.00109953	0.023277	20.6091	2572.52	97.1951	48.1435	0.182821	0.333309	0.530904		107_23CR01A	999	4	0.313065	0.0205074	575.743	15.0317			0.321862		107_23CR01A	999	4	0.000543758	3.38341e-05	0.00173689	4.53473e-05			0.0807534		107_23CR01A	999	4	0.0743605	1.17293	0.0300295	79.5826	0.0153968	2.32934	0.0232972	3.05455	42.8077	0.572684
108_23CR01A	999	4	0.0647711	0.0266189	0.000167416	0.0231049	19.4261	2501.56	101.846	50.1136	0.18147	0.373236	0.755189		108_23CR01A	999	4	0.356717	0.0251104	598.48	16.3577			0.306908		108_23CR01A	999	4	0.000596038	4.00778e-05	0.0016709	4.56693e-05			0.0851864		108_23CR01A	999	4	0.0647782	1.21482	0.0266189	101.114	0.0126566	2.49118	0.0231229	3.29981	38.7642	0.625615
		S	71.4799	8.12738	0.554309	12.7321	25069.8																																S	71.4823	0.0357823	8.12738	2.76854	14.1825	0.0434762	12.7376	0.0708917	46410.9	0.0304815
Information on Analysis				Results		40(r)/39(k)	± 2s	Age	± 2s	MSWD	39Ar(k)	K/Ca	± 2s		Results			40(a)/36(a)	± 2s	40(r)/39(k)	± 2s	Age	± 2s	MSWD		Results			40(a)/36(a)	± 2s	40(r)/39(k)	± 2s	Age	± 2s	MSWD		Information on Analysis and Constants Used in Calculations									Results		40(a)/36(a)	± 2s
								(Ma)			(%,n)											(Ma)											(Ma)
Sample = 003_23CR01A				Age Plateau Error Mean		1072.86	65.2097	2843.89	87.7442	42.8031	6.46594	0.322166	0.124114		Normal Isochron Error Chron			4959.94	1961.48	-14384.5	6502.67	0	844.309	14.6509		Inverse Isochron Error Chron			3874.08	7284.84	-10750.2	32980.2	0	5769.64	14.482		Sample = 003_23CR01A				Age Equations = Min et al. (2000)					Age Plateau Error Mean
Material = Quartz							0.060781		0.0308536	9.31198e-177	22								0.395464		0.45206			2.14839e-50						1.8804		3.06788			1.04869e-49		Material = Quartz				Negative Intensities = Allowed
Location = R1 Rursee				Full External Error					95.8676	1.61721	2σ Confidence Limit				Full External Error								845.016			Full External Error								5769.74			Location = R1 Rursee				Decay Constant 40K = 5.460 ± 0.053 E-10 1/a					Full External Error
Analyst = Klaudia Kuiper				Analytical Error					87.7253	6.54241	Error Magnification				Analytical Error								844.305			Analytical Error								5769.64			Analyst = Klaudia Kuiper				Decay Constant 39Ar = 2.940 ± 0.016 E-07 1/h					Analytical Error
Project = VU123																																					Project = VU123				Decay Constant 37Ar = 8.230 ± 0.012 E-04 1/h
Mass Discrimination Law = LIN				Total Fusion Age		1969.02	3.80932	3770.07	3.68708		67	0.673625	0.0373114																								Mass Discrimination Law = LIN				Decay Constant 36Cl = 2.257 ± 0.015 E-06 1/a					Total Fusion Age
Irradiation = VU123							0.00193462		0.000977986						Statistics			2σ Confidence Limit	1.63246		Convergence	0.042244				Statistics			2σ Confidence Limit	1.63246		Convergence	1.73476e-06				Irradiation = VU123				Decay Activity 40K(EC,β⁺) = 3.310 ± 0.030 1/gs
J = 0.00347370 ± 0.00000219				Full External Error					47.4819									Error Magnification	3.82766		Number of Iterations	11							Error Magnification	3.80553		Number of Iterations	8				J = 0.00347370 ± 0.00000219				Decay Activity 40K(β⁻) = 27.890 ± 0.150 1/gs					Full External Error
DRA = 25.522 ± 0.079 Ma				Analytical Error					3.08958									Number of Data Points	22		Calculated Line	Weighted York-2							Number of Data Points	22		Calculated Line	Weighted York-2				DRA = 25.522 ± 0.079 Ma				Atmospheric Ratio 40/36(a) = 298.56 ± 0.31					Analytical Error
																													Spreading Factor	1.25812							IGSN = Undefined				Atmospheric Ratio 38/36(a) = 0.1885 ± 0.0003
																																					Preferred Age = Undefined				Production Ratio 39/37(ca) = 0.000673 ± 0.000004					Normal Isochron Error Chron		4959.94	1961.48
																																					Classification = Undefined				Production Ratio 36/37(ca) = 0.000264 ± 0.000002								0.395464
																																					Experiment Type = Undefined				Production Ratio 40/39(k) = 0.000860 ± 0.000070					Full External Error
																																					Extraction Method = Undefined				Production Ratio 38/39(k) = 0.012110 ± 0.000030					Analytical Error
																																					Heating = 180 sec				Production Ratio 36/38(cl) = 262.80 ± 1.71
																																					Isolation = 5.00 min				Scaling Ratio K/Ca = 0.430
																																					Instrument = HELIX				Abundance Ratio 40K/K = 1.1700 ± 0.0100 E-04
																																					Lithology = Undefined				Atomic Weight K = 39.0983 ± 0.0001 g					Inverse Isochron Error Chron		3874.08	7284.84
																																					Lat-Lon = Undefined - Undefined												1.8804
																																					Feature = Undefined									Full External Error
																																														Analytical Error
[truncated: 149 more columns]

## Sheet: Rursee 1b BNV
	Incremental Crushing			36Ar(a) [fA]	37Ar(ca) [fA]	38Ar(cl) [fA]	39Ar(k) [fA]	40Ar(r) [fA]	Age	± 2s	40Ar(r)	39Ar(k)	K/Ca	± 2s		Normal Isochron			39(k)/36(a)	± 2s	40(a+r)/36(a)	± 2s			r.i.		Inverse Isochron			39(k)/40(a+r)	± 2s	36(a)/40(a+r)	± 2s			r.i.		Relative Abundances			36Ar [fA]	%1s	37Ar [fA]	%1s	38Ar [fA]	%1s	39Ar [fA]	%1s	40Ar [fA]
									(Ma)		(%)	(%)
	003_23CR01B	1		0.722864	0.339547	0.00841448	0.0246674	133.151	5461.32	82.458	38.1555	0.0276806	0.0312386	0.0559359		003_23CR01B	1		0.0341246	0.00152677	482.759	4.67228			0.178365		003_23CR01B	1		7.06865e-05	3.11419e-06	0.00207143	2.00479e-05			0.038543		003_23CR01B	1		0.722958	0.43922	0.339547	89.5032	0.144973	0.475319	0.0248959	2.01208	348.969
	004_23CR01B	3		2.4657	1.29495	0.0170841	0.0893979	569.534	5750.45	31.5889	43.6193	0.100318	0.0296855	0.0140954		004_23CR01B	3		0.0362566	0.000531906	529.543	4.17152			0.421301		004_23CR01B	3		6.84678e-05	9.18347e-07	0.00188842	1.48762e-05			0.12651		004_23CR01B	3		2.46605	0.348824	1.29495	23.7324	0.482951	0.22989	0.0902694	0.596504	1305.69
	005_23CR01B	5		3.28855	1.39348	0.0209795	0.126816	867.593	5875.43	33.4172	46.9116	0.142308	0.039133	0.0169844		005_23CR01B	5		0.038563	0.000650822	562.383	4.41116			0.368505		005_23CR01B	5		6.85708e-05	1.08157e-06	0.00177815	1.39473e-05			0.102992		005_23CR01B	5		3.28893	0.34917	1.39348	21.6873	0.642406	0.21577	0.127754	0.745735	1849.42
	013_23CR01B	7		2.32865	0.970513	0.0147295	0.100632	741.922	6007	35.5364	51.6241	0.112924	0.0445863	0.01228		013_23CR01B	7		0.0432146	0.000821797	617.166	4.86286			0.329788		013_23CR01B	7		7.0021e-05	1.2621e-06	0.00162031	1.2767e-05			0.0892043		013_23CR01B	7		2.32891	0.351436	0.970513	13.7426	0.454899	0.338737	0.101285	0.873295	1437.16
	014_23CR01B	9		2.58425	1.2655	0.012486	0.100461	750.69	6030.69	34.0915	49.3147	0.112733	0.0341351	0.00728091		014_23CR01B	9		0.0388743	0.000689749	589.047	4.69532			0.360015		014_23CR01B	9		6.59952e-05	1.09743e-06	0.00169766	1.35321e-05			0.0952115		014_23CR01B	9		2.58459	0.356732	1.2655	10.6339	0.500834	0.255177	0.101312	0.800432	1522.24
	015_23CR01B	11		2.1552	1.29498	0.0136676	0.0938028	707.658	6047.51	39.2851	52.3758	0.105261	0.0311474	0.00572137		015_23CR01B	11		0.0435239	0.000929274	626.909	5.04538			0.303385		015_23CR01B	11		6.94262e-05	1.41665e-06	0.00159513	1.28376e-05			0.0769656		015_23CR01B	11		2.15555	0.360949	1.29498	9.12925	0.421059	0.205968	0.0946743	0.991836	1351.12
	016_23CR01B	13		1.87477	1.10112	0.013726	0.0808365	596.758	6009.3	38.0654	51.6009	0.0907111	0.0315677	0.00853586		016_23CR01B	13		0.0431182	0.000885028	616.871	4.9637			0.314605		016_23CR01B	13		6.98982e-05	1.36638e-06	0.00162109	1.30442e-05			0.0812928		016_23CR01B	13		1.87506	0.360355	1.10112	13.4857	0.368098	0.314208	0.0815776	0.944257	1156.49
	018_23CR01B	17		1.39903	0.934096	0.00864338	0.0715906	481.733	5846.36	49.1548	53.56	0.0803358	0.0329559	0.0117279		018_23CR01B	17		0.0511717	0.00140212	642.894	5.40621			0.251412		018_23CR01B	17		7.95958e-05	2.11436e-06	0.00155547	1.30802e-05			0.0572375		018_23CR01B	17		1.39928	0.380473	0.934096	17.7446	0.273227	0.241022	0.0722193	1.29546	899.427
	019_23CR01B	21		1.17818	0.756585	0.00584913	0.0751507	406.198	5463.66	38.9152	53.5912	0.0843307	0.0427114	0.0178535		019_23CR01B	21		0.0637853	0.00137857	643.326	5.22385			0.303058		019_23CR01B	21		9.91492e-05	2.04803e-06	0.00155442	1.2622e-05			0.0760143		019_23CR01B	21		1.17839	0.364563	0.756585	20.8754	0.228847	0.385604	0.0756599	1.00059	757.956
	020_23CR01B	25		1.23214	0.64956	0.010226	0.0856505	449.389	5412.03	31.3739	54.9874	0.0961131	0.0566995	0.0264084		020_23CR01B	25		0.0695134	0.00120402	663.282	5.47599			0.387238		020_23CR01B	25		0.000104802	1.68147e-06	0.00150766	1.2447e-05			0.0965255		020_23CR01B	25		1.23232	0.372001	0.64956	23.2749	0.243522	0.265786	0.0860877	0.769029	817.258
	021_23CR01B	30		1.11212	0.797486	0.0125459	0.0971978	409.411	5033.24	39.1117	55.218	0.109071	0.0524085	0.0172827		021_23CR01B	30		0.0873989	0.00194207	666.697	5.37059			0.290447		021_23CR01B	30		0.000131092	2.79529e-06	0.00149993	1.20827e-05			0.0751105		021_23CR01B	30		1.11233	0.360436	0.797486	16.4549	0.223357	0.326851	0.0977345	1.04123	741.445
	023_23CR01B	35		1.14743	0.88594	0.0121815	0.108912	415.811	4865.39	29.2984	54.8284	0.122216	0.0528616	0.0210236		023_23CR01B	35		0.0949187	0.00155481	660.946	5.41713			0.40515		023_23CR01B	35		0.00014361	2.16232e-06	0.00151298	1.24005e-05			0.103574		023_23CR01B	35		1.14767	0.368659	0.88594	19.872	0.22979	0.386056	0.109508	0.71923	758.386
	024_23CR01B	40		0.859091	0.624749	0.00939889	0.114476	317.877	4330.1	31.0795	55.3438	0.12846	0.0787911	0.0398653		024_23CR01B	40		0.133252	0.00242108	668.575	6.01667			0.416617		024_23CR01B	40		0.000199308	3.30432e-06	0.00149572	1.34603e-05			0.0862345		024_23CR01B	40		0.859262	0.412565	0.624749	25.2852	0.172724	0.303854	0.114896	0.801024	574.367
	025_23CR01B	50		0.801457	0.512157	0.00573682	0.146464	308.193	3876.56	28.5126	56.2934	0.164355	0.122969	0.0638633		025_23CR01B	50		0.182747	0.00315913	683.1	6.35668			0.456924		025_23CR01B	50		0.000267526	4.13088e-06	0.00146391	1.36227e-05			0.09111		025_23CR01B	50		0.801596	0.428574	0.512157	25.9564	0.158585	0.40676	0.146809	0.746309	547.476
	026_23CR01B	60		0.829879	0.464613	0.00498918	0.181308	320.435	3598.72	21.6356	56.3943	0.203456	0.167801	0.116182		026_23CR01B	60		0.218475	0.0028431	684.682	5.79175			0.532817		026_23CR01B	60		0.00031909	3.54746e-06	0.00146053	1.23547e-05			0.137198		026_23CR01B	60		0.830005	0.382834	0.464613	34.6149	0.163617	0.497687	0.181621	0.521759	568.203
	028_23CR01B	70		0.833456	0.931937	0.00576791	0.212967	327.078	3379.94	18.8641	56.7928	0.238981	0.0982637	0.0350988		028_23CR01B	70		0.255522	0.00298611	690.996	6.29964			0.658376		028_23CR01B	70		0.000369788	3.29499e-06	0.00144719	1.31936e-05			0.159675		028_23CR01B	70		0.833706	0.418602	0.931937	17.8548	0.165453	0.356287	0.213594	0.402912	575.915
	029_23CR01B	80		0.753763	0.417391	0.00600756	0.25317	299.679	2987.24	18.4715	57.1119	0.284095	0.260818	0.188411		029_23CR01B	80		0.335874	0.00395061	696.137	6.03753			0.599122		029_23CR01B	80		0.000482483	4.61099e-06	0.0014365	1.24586e-05			0.170134		029_23CR01B	80		0.753876	0.390795	0.417391	36.1166	0.151158	0.423321	0.25345	0.437089	524.722
	030_23CR01B	90		0.672386	0.653938	0.0052455	0.271924	271.204	2739.38	16.25	57.4643	0.305141	0.178805	0.0704829		030_23CR01B	90		0.404417	0.00434757	701.906	5.938			0.643918		030_23CR01B	90		0.00057617	4.82106e-06	0.00142469	1.20527e-05			0.183756		030_23CR01B	90		0.672561	0.382493	0.653938	19.7058	0.135283	0.475229	0.272364	0.375554	471.951
	031_23CR01B	100		0.618695	0.718782	0.00786064	0.304393	259.629	2521.18	14.4512	58.4293	0.341576	0.182098	0.0713369		031_23CR01B	100		0.491992	0.00498047	718.199	6.37062			0.72766		031_23CR01B	100		0.000685035	4.86707e-06	0.00139237	1.23507e-05			0.211701		031_23CR01B	100		0.618889	0.403994	0.718782	19.5851	0.128171	0.427831	0.304876	0.302625	444.346
	033_23CR01B	120		0.562496	0.438298	0.00798479	0.342537	239.387	2255.57	12.9955	58.7704	0.38438	0.336052	0.191099		033_23CR01B	120		0.60896	0.00580543	724.14	6.21552			0.73925		033_23CR01B	120		0.000840941	5.55121e-06	0.00138095	1.18531e-05			0.232651		033_23CR01B	120		0.562616	0.388753	0.438298	28.4316	0.118163	0.427212	0.342832	0.274326	407.326
	034_23CR01B	140		0.550748	0.655518	0.00468267	0.389812	243.206	2110.94	12.2859	59.6623	0.437429	0.255704	0.106109		034_23CR01B	140		0.707786	0.00680543	740.152	6.54482			0.764534		034_23CR01B	140		0.000956271	6.09591e-06	0.00135107	1.19469e-05			0.233968		034_23CR01B	140		0.550924	0.402938	0.655518	20.7466	0.113219	0.584739	0.390253	0.260604	407.637
	035_23CR01B	180		0.567862	0.538958	0.00614836	0.453317	248.892	1954.1	12.317	59.4819	0.508692	0.361672	0.167985		035_23CR01B	180		0.798287	0.00806771	736.856	6.60921			0.742654		035_23CR01B	180		0.00108337	7.50174e-06	0.00135712	1.21726e-05			0.211424		035_23CR01B	180		0.568008	0.410098	0.538958	23.2215	0.11868	0.536008	0.45368	0.294208	418.433
	036_23CR01B	230		0.618682	0.816996	0.00728428	0.539148	273.577	1860.71	11.6746	59.695	0.605007	0.283763	0.0946268		036_23CR01B	230		0.871445	0.00897889	740.753	7.24611			0.819604		036_23CR01B	230		0.00117643	7.12064e-06	0.00134998	1.32056e-05			0.220948		036_23CR01B	230		0.618902	0.454244	0.816996	16.6718	0.130435	0.40397	0.539697	0.241817	458.291
	038_23CR01B	290		0.658884	0.471542	0.00586045	0.605909	290.016	1793.24	12.3992	59.5842	0.679924	0.55253	0.329715		038_23CR01B	290		0.919598	0.00995131	738.722	6.76859			0.71489		038_23CR01B	290		0.00124485	9.58533e-06	0.00135369	1.24033e-05			0.185257		038_23CR01B	290		0.659012	0.420839	0.471542	29.8349	0.137398	0.463394	0.606226	0.339388	486.733
	039_23CR01B	370		0.673406	0.682918	0.00623727	0.670048	293.349	1692.99	11.0946	59.3341	0.751897	0.421896	0.187113		039_23CR01B	370		0.995014	0.010091	734.18	6.95531			0.799493		039_23CR01B	370		0.00135527	8.46091e-06	0.00136206	1.29036e-05			0.218715		039_23CR01B	370		0.67359	0.438056	0.682918	22.1737	0.141289	0.402224	0.670508	0.254514	494.402
	040_23CR01B	470		0.693184	0.537305	0.00429559	0.756943	295.689	1569.95	10.5001	58.8264	0.849407	0.605774	0.28657		040_23CR01B	470		1.09198	0.0102983	725.126	6.04589			0.720862		040_23CR01B	470		0.00150592	1.01124e-05	0.00137907	1.14983e-05			0.229244		040_23CR01B	470		0.693328	0.376329	0.537305	23.6515	0.144127	0.449659	0.757305	0.283619	502.646
	041_23CR01B	590		0.773592	0.594219	0.00872193	0.92216	307.824	1409.8	9.62129	57.1327	1.03481	0.66731	0.280871		041_23CR01B	590		1.19205	0.0106007	696.476	5.82663			0.768515		041_23CR01B	590		0.00171154	1.00852e-05	0.0014358	1.20117e-05			0.259919		041_23CR01B	590		0.773754	0.377968	0.594219	21.0437	0.165711	0.406464	0.92256	0.233752	538.789
	049_23CR01B	750		0.713949	0.741838	0.00541043	1.10906	292.816	1191.8	8.76017	57.8718	1.24454	0.642859	0.226991		049_23CR01B	750		1.55342	0.0144926	708.695	6.35395			0.793292		049_23CR01B	750		0.00219195	1.29144e-05	0.00141104	1.2651e-05			0.265576		049_23CR01B	750		0.714148	0.407151	0.741838	17.6533	0.153421	0.423864	1.10956	0.227157	505.973
	050_23CR01B	300		0.496388	0.475736	0.00313757	0.87341	173.886	962.614	8.45476	53.987	0.980101	0.789442	0.573105		050_23CR01B	300		1.75953	0.0166273	648.862	6.10578			0.815632		050_23CR01B	300		0.00271171	1.55281e-05	0.00154116	1.45023e-05			0.297287		050_23CR01B	300		0.496516	0.42561	0.475736	36.2975	0.107284	0.533124	0.87373	0.204258	322.089
	051_23CR01B	500		0.74866	0.776362	0.00272247	1.58958	239.434	770.672	7.24588	51.7186	1.78376	0.880414	0.397128		051_23CR01B	500		2.12324	0.0193803	618.377	5.46847			0.790481		051_23CR01B	500		0.00343356	1.9993e-05	0.00161714	1.43008e-05			0.279583		051_23CR01B	500		0.748867	0.399238	0.776362	22.5524	0.163095	0.373269	1.59011	0.220646	462.955
	052_23CR01B	700		0.759089	0.730173	0.00268362	2.30665	239.593	564.21	5.49842	51.3896	2.58842	1.35839	0.505819		052_23CR01B	700		3.03871	0.0266342	614.193	5.34888			0.806666		052_23CR01B	700		0.00494748	2.68801e-05	0.00162815	1.41792e-05			0.301555		052_23CR01B	700		0.759283	0.392219	0.730173	18.6173	0.173705	0.430408	2.30714	0.195175	466.229
	054_23CR01B	900		0.72553	0.628909	0.00389826	3.10445	219.506	402.227	4.16895	50.3312	3.48367	2.12258	0.883413		054_23CR01B	900		4.27887	0.0366881	601.106	5.25857			0.827152		054_23CR01B	900		0.00711833	3.62689e-05	0.0016636	1.45534e-05			0.325003		054_23CR01B	900		0.725698	0.393719	0.628909	20.8092	0.178255	0.429297	3.10487	0.169321	436.123
	055_23CR01B	700		0.303826	0.194621	0.00121289	1.52735	92.0151	348.003	4.80725	50.3567	1.71392	3.37455	5.01236		055_23CR01B	700		5.02704	0.0591016	601.415	7.2979			0.870105		055_23CR01B	700		0.00835869	5.09846e-05	0.00166275	2.01767e-05			0.312308		055_23CR01B	700		0.303878	0.556835	0.194621	74.2669	0.0769802	0.559889	1.52748	0.187554	182.727
	056_23CR01B	999		0.378872	0.415237	0.00232932	2.3276	116.002	292.418	3.59367	50.6293	2.61192	2.41035	1.47631		056_23CR01B	999		6.1435	0.0619458	604.737	6.13196			0.817237		056_23CR01B	999		0.010159	6.21071e-05	0.00165361	1.67674e-05			0.310714		056_23CR01B	999		0.378983	0.456825	0.415237	30.6237	0.101934	0.388146	2.32788	0.212745	229.12
	057_23CR01B	999		0.318016	0.335692	0.00259824	2.37513	104.337	260.093	3.49756	52.3553	2.66526	3.04239	2.03449		057_23CR01B	999		7.46856	0.0913486	626.645	7.79693			0.877043		057_23CR01B	999		0.0119183	7.29539e-05	0.0015958	1.98554e-05			0.280199		057_23CR01B	999		0.318107	0.57741	0.335692	33.4352	0.0913071	0.483262	2.37535	0.200755	199.286
	059_23CR01B	999		0.303516	0.56247	0.00135479	2.28658	92.6397	241.151	3.39437	50.5511	2.5659	1.74806	0.771967		059_23CR01B	999		7.53364	0.0884001	603.782	7.27715			0.866043		059_23CR01B	999		0.0124774	7.69074e-05	0.00165623	1.99619e-05			0.306703		059_23CR01B	999		0.303665	0.552978	0.56247	22.0799	0.0862581	0.583439	2.28696	0.194913	183.259
	060_23CR01B	999		0.246278	0.116606	0.00099828	2.31598	86.5674	223.577	3.0961	54.0715	2.59888	8.54044	19.7861		060_23CR01B	999		9.40393	0.121525	650.064	8.67024			0.881751		060_23CR01B	999		0.0144662	9.25542e-05	0.00153831	2.05173e-05			0.303671		060_23CR01B	999		0.246309	0.616145	0.116606	115.838	0.0754681	0.543554	2.31606	0.193737	160.098
	061_23CR01B	999		0.274054	0.206693	0.000479658	2.2998	83.3791	217.241	3.42589	50.4708	2.58073	4.78445	5.28129		061_23CR01B	999		8.39179	0.113452	602.804	8.41541			0.898945		061_23CR01B	999		0.0139213	8.61996e-05	0.00165891	2.31592e-05			0.291877		061_23CR01B	999		0.274109	0.651052	0.206693	55.1919	0.0799894	0.537444	2.29994	0.180995	165.203
	062_23CR01B	999		0.214418	0.175012	0.00212129	2.22059	72.8219	197.581	3.14709	53.2166	2.49184	5.45593	9.91361		062_23CR01B	999		10.3563	0.152244	638.185	9.71727			0.898377		062_23CR01B	999		0.0162278	0.000109787	0.00156694	2.38589e-05			0.298541		062_23CR01B	999		0.214466	0.708604	0.175012	90.8516	0.0694305	0.456924	2.22071	0.193688	136.841
	064_23CR01B	999		0.198194	0.0649913	0.00117973	2.17089	67.1226	186.843	3.26437	53.1465	2.43608	14.3632	49.8957		064_23CR01B	999		10.9534	0.180794	637.231	10.9375			0.920196		064_23CR01B	999		0.017189	0.000116139	0.00156929	2.69355e-05			0.292382		064_23CR01B	999		0.198212	0.807096	0.0649913	173.692	0.0648288	0.76062	2.17094	0.171307	126.297
	065_23CR01B	999		0.194502	0.18435	0	2.10822	63.025	180.949	3.17539	52.045	2.36575	4.91745	8.34073		065_23CR01B	999		10.8391	0.167564	622.593	10.0843			0.905733		065_23CR01B	999		0.0174096	0.000120307	0.00160618	2.60158e-05			0.317689		065_23CR01B	999		0.19455	0.752495	0.18435	84.8072	0.0618302	0.720961	2.10834	0.174522	121.097
	066_23CR01B	999		0.172401	0.216584	0.000612291	2.03192	58.72	175.199	3.18368	53.2879	2.28012	4.03412	5.69104		066_23CR01B	999		11.786	0.196501	639.161	11.219			0.913341		066_23CR01B	999		0.0184397	0.000132325	0.00156455	2.74622e-05			0.324012		066_23CR01B	999		0.172459	0.816839	0.216584	70.5361	0.0577164	0.762387	2.03206	0.163339	110.194
	067_23CR01B	999		0.225345	0.151495	0.00175866	2.00538	55.8162	169.027	3.55245	45.3433	2.25035	5.69204	8.19547		067_23CR01B	999		8.89916	0.13096	546.252	8.40336			0.891073		067_23CR01B	999		0.0162913	0.000114926	0.00183066	2.81622e-05			0.321883		067_23CR01B	999		0.225386	0.709906	0.151495	71.9903	0.0685215	0.777385	2.00549	0.192525	123.097
	069_23CR01B	999		0.136523	0.121259	0.000793961	1.88977	49.8753	160.65	3.18803	55.0274	2.12061	6.70133	14.7982		069_23CR01B	999		13.8421	0.265966	663.885	13.4355			0.916273		069_23CR01B	999		0.0208501	0.000169595	0.00150629	3.04837e-05			0.323592		069_23CR01B	999		0.136556	0.943209	0.121259	110.413	0.0494137	0.714242	1.88985	0.179473	90.6374
	070_23CR01B	999		0.149907	0.00976956	0.000993497	1.8604	47.7174	156.313	3.33201	51.6001	2.08766	81.8843	2516.4		070_23CR01B	999		12.4104	0.226488	616.873	11.9177			0.910344		070_23CR01B	999		0.0201182	0.000161405	0.00162108	3.13185e-05			0.337268		070_23CR01B	999		0.149911	0.895371	0.00976956	1536.56	0.0517805	0.893266	1.86041	0.17377	92.4754
	071_23CR01B	999		0.178444	0.103216	0.00206052	1.81956	45.2176	151.645	3.51044	45.9083	2.04183	7.58033	20.964		071_23CR01B	999		10.1968	0.163679	551.959	9.41873			0.89116		071_23CR01B	999		0.0184739	0.000143871	0.00181173	3.09157e-05			0.354316		071_23CR01B	999		0.178473	0.780776	0.103216	138.279	0.0577322	0.567194	1.81963	0.184064	98.4955
	072_23CR01B	999		0.127267	0.245532	0.000387684	1.73638	41.3286	145.49	3.47975	52.0992	1.94849	3.04093	3.75931		072_23CR01B	999		13.6436	0.285349	623.301	13.7653			0.913003		072_23CR01B	999		0.0218893	0.000197895	0.00160436	3.54315e-05			0.330676		072_23CR01B	999		0.127332	1.02576	0.245532	61.8116	0.045405	0.623305	1.73655	0.198085	79.3269
	074_23CR01B	999		0.107986	0.223377	0.00103067	1.70052	38.9064	140.061	2.03417	54.6836	1.90825	3.27349	3.89321		074_23CR01B	999		15.7476	0.247539	658.85	10.3618			0.939648		074_23CR01B	999		0.0239016	0.000130565	0.0015178	2.38706e-05			0.175125		074_23CR01B	999		0.108046	0.760954	0.223377	59.4654	0.0419794	0.852375	1.70067	0.192232	71.1482
	075_23CR01B	999		0.102548	0.0383044	0	1.6532	36.4877	135.293	1.72154	54.3733	1.85515	18.5586	153.754		075_23CR01B	999		16.1212	0.205237	654.371	8.29941			0.90071		075_23CR01B	999		0.0246362	0.000139507	0.00152819	1.9382e-05			0.214771		075_23CR01B	999		0.102558	0.601537	0.0383044	414.24	0.0391705	0.73553	1.65323	0.203863	67.1059
	076_23CR01B	999		0.103156	0.464813	0.000129583	1.65666	35.6032	131.862	1.97072	53.6171	1.85903	1.53258	1.092		076_23CR01B	999		16.0598	0.248815	643.701	10.0214			0.940753		076_23CR01B	999		0.0249492	0.000133395	0.00155352	2.41857e-05			0.185779		076_23CR01B	999		0.103278	0.75109	0.464813	35.6256	0.0396365	0.855597	1.65697	0.180967	66.4028
	084_23CR01B	999		0.0923753	0.00619414	0.000773893	1.4858	29.7653	123.212	1.94665	51.9047	1.6673	103.145	4227.86		084_23CR01B	999		16.0844	0.24739	620.782	9.5778			0.937172		084_23CR01B	999		0.0259099	0.00014149	0.00161087	2.48535e-05			0.185722		084_23CR01B	999		0.0923773	0.744744	0.00619414	2049.47	0.0361797	0.956874	1.48581	0.188149	57.3462
	085_23CR01B	999		0.0919259	0.134048	0.0015225	1.48129	29.0216	120.586	1.95653	51.3945	1.66224	4.7517	9.55011		085_23CR01B	999		16.114	0.248195	614.266	9.44769			0.92809		085_23CR01B	999		0.0262329	0.000153122	0.00162796	2.50388e-05			0.18598		085_23CR01B	999		0.0919622	0.740085	0.134048	100.491	0.0367889	0.656746	1.48138	0.20831	56.4682
	086_23CR01B	999		0.0873347	0.290623	0	1.46196	26.7327	112.787	2.01256	50.6218	1.64054	2.16309	1.65896		086_23CR01B	999		16.7397	0.282744	604.655	10.2486			0.947706		086_23CR01B	999		0.0276847	0.000151498	0.00165384	2.80318e-05			0.172177		086_23CR01B	999		0.0874114	0.822173	0.290623	38.3467	0.0338209	1.08918	1.46215	0.186826	52.8086
	087_23CR01B	999		0.115368	0.114038	0.00049392	1.41977	25.9881	112.901	2.12038	43.0027	1.5932	5.35346	13.6796		087_23CR01B	999		12.3064	0.15952	523.822	6.77796			0.904981		087_23CR01B	999		0.0234935	0.000132639	0.00190904	2.47019e-05			0.214103		087_23CR01B	999		0.115399	0.614946	0.114038	127.764	0.0394342	0.702382	1.41984	0.201327	60.4336
	089_23CR01B	999		0.0859339	0.248099	0	1.38751	24.5505	109.245	2.09285	48.8974	1.557	2.40481	2.72208		089_23CR01B	999		16.1463	0.274952	584.25	10.0192			0.950391		089_23CR01B	999		0.0276359	0.000148793	0.0017116	2.93518e-05			0.179177		089_23CR01B	999		0.0859994	0.83122	0.248099	56.5964	0.0321714	1.09129	1.38768	0.176233	50.2081
	090_23CR01B	999		0.0844815	0.180547	0.000470599	1.36105	23.8434	108.192	2.31565	48.5931	1.52731	3.24156	5.12513		090_23CR01B	999		16.1107	0.309237	580.792	11.2171			0.961514		090_23CR01B	999		0.0277392	0.000148213	0.00172179	3.32536e-05			0.160508		090_23CR01B	999		0.0845294	0.942399	0.180547	79.0533	0.0328777	1.14828	1.36118	0.172939	49.0673
	091_23CR01B	999		0.0849679	0.0213656	0.00107797	1.34234	23.6343	108.722	1.9752	48.2298	1.50631	27.0158	406.312		091_23CR01B	999		15.7982	0.245025	576.716	8.90658			0.926936		091_23CR01B	999		0.0273934	0.000162074	0.00173396	2.67786e-05			0.18037		091_23CR01B	999		0.0849742	0.743296	0.0213656	751.991	0.0333502	0.807416	1.34236	0.215048	49.0035
	092_23CR01B	999		0.0870901	0.155516	0	1.30808	22.4656	106.129	1.87917	46.351	1.46787	3.61684	6.92768		092_23CR01B	999		15.0199	0.206616	556.518	7.71038			0.919685		092_23CR01B	999		0.026989	0.000149354	0.00179689	2.48953e-05			0.217444		092_23CR01B	999		0.0871311	0.660115	0.155516	95.7696	0.0319807	1.05336	1.30819	0.186593	48.4683
	094_23CR01B	999		0.0726068	-0.0975828	0	1.27331	21.6945	105.309	2.13503	50.0183	1.42885	-5.61084	14.6718		094_23CR01B	999		17.537	0.331431	597.354	11.276			0.946707		094_23CR01B	999		0.0293578	0.000181032	0.00167405	3.16002e-05			0.159696		094_23CR01B	999		0.0725811	0.918032	-0.0975828	130.745	0.0288427	1.11479	1.27324	0.220339	43.3731
	095_23CR01B	999		0.0725219	0.114007	0.000698653	1.25999	20.8666	102.442	1.88979	49.075	1.4139	4.75227	11.7295		095_23CR01B	999		17.3739	0.281181	586.288	9.56963			0.940937		095_23CR01B	999		0.0296337	0.000165588	0.00170565	2.78402e-05			0.195815		095_23CR01B	999		0.0725524	0.786295	0.114007	123.41	0.0296275	1.25134	1.26006	0.18262	42.5198
	096_23CR01B	999		0.0746742	0.182778	0.000907783	1.22418	20.0905	101.542	2.18919	47.3986	1.37372	2.87998	4.34661		096_23CR01B	999		16.3936	0.299258	567.602	10.4526			0.956534		096_23CR01B	999		0.0288823	0.000156203	0.0017618	3.24442e-05			0.176443		096_23CR01B	999		0.074723	0.894683	0.182778	75.4625	0.0298087	1.0722	1.2243	0.170668	42.3863
	097_23CR01B	999		0.0707816	0.0660171	0	1.21886	19.0667	96.9117	2.18745	47.4292	1.36774	7.93896	34.1307		097_23CR01B	999		17.2199	0.331362	567.933	10.9341			0.951349		097_23CR01B	999		0.0303204	0.000182042	0.00176077	3.38992e-05			0.15752		097_23CR01B	999		0.070799	0.936958	0.0660171	214.957	0.0275668	1.13577	1.2189	0.211032	40.2003
	099_23CR01B	999		0.0638584	-0.0671691	0	1.18509	18.7828	98.1551	2.08593	49.625	1.32986	-7.58666	29.9386		099_23CR01B	999		18.5581	0.364199	592.691	11.679			0.955952		099_23CR01B	999		0.0313116	0.000182774	0.00168722	3.32466e-05			0.161826		099_23CR01B	999		0.0638407	0.960048	-0.0671691	197.311	0.0262333	1.4692	1.18505	0.19646	37.8494
	100_23CR01B	999		0.0785272	-0.0374303	0	1.18322	18.4967	96.8482	2.38293	44.0998	1.32775	-13.5928	112.83		100_23CR01B	999		15.0676	0.276826	534.105	9.89624			0.953199		100_23CR01B	999		0.0282109	0.000159305	0.00187229	3.4691e-05			0.179953		100_23CR01B	999		0.0785173	0.899266	-0.0374303	415.035	0.0283904	0.949881	1.18319	0.180477	41.9428
	101_23CR01B	999		0.064188	-0.0178477	0	1.11695	17.1462	95.1483	2.55812	47.2203	1.25339	-26.9103	360.634		101_23CR01B	999		17.4012	0.404017	565.685	13.161			0.966274		101_23CR01B	999		0.0307612	0.000185687	0.00176777	4.11283e-05			0.137643		101_23CR01B	999		0.0641833	1.14135	-0.0178477	670.066	0.0250012	1.04452	1.11693	0.206683	36.3112
	102_23CR01B	999		0.0624444	-0.0391074	0	1.10555	16.8695	94.5921	2.24876	47.5011	1.2406	-12.1559	92.8964		102_23CR01B	999		17.7045	0.361069	568.712	11.6387			0.957326		102_23CR01B	999		0.0311309	0.000185813	0.00175836	3.59848e-05			0.15767		102_23CR01B	999		0.0624341	0.997612	-0.0391074	382.104	0.0248216	1.22695	1.10552	0.202079	35.5138
	104_23CR01B	999		0.0583586	0.258752	0.00106199	1.07408	16.0494	92.6787	2.12679	47.946	1.20529	1.78494	2.09669		104_23CR01B	999		18.4049	0.365534	573.573	11.3501			0.944898		104_23CR01B	999		0.0320882	0.00021119	0.00174346	3.45003e-05			0.155304		104_23CR01B	999		0.0584275	0.959941	0.258752	58.7324	0.0250697	1.1922	1.07426	0.240033	33.4738
	105_23CR01B	999		0.0569424	0.271484	0	1.06632	15.4554	89.9657	2.40714	47.618	1.19658	1.68893	1.86816		105_23CR01B	999		18.7263	0.436774	569.981	13.3469			0.965844		105_23CR01B	999		0.0328542	0.000200703	0.00175444	4.10827e-05			0.14552		105_23CR01B	999		0.057014	1.14483	0.271484	55.3056	0.0232333	1.56207	1.0665	0.202858	32.457
	106_23CR01B	999		0.054769	0.0583809	0	1.03237	15.0347	90.3847	1.99272	47.9004	1.15848	7.60382	33.4663		106_23CR01B	999		18.8495	0.354071	573.071	10.7773			0.941559		106_23CR01B	999		0.0328921	0.000211356	0.00174498	3.28166e-05			0.174282		106_23CR01B	999		0.0547844	0.909524	0.0583809	220.062	0.0224919	1.3658	1.03241	0.224721	31.3874
	107_23CR01B	999		0.0567101	0.0540158	0	1.02158	14.4671	87.9501	2.3872	46.0745	1.14637	8.13239	48.1544		107_23CR01B	999		18.014	0.399433	553.666	12.3334			0.961794		107_23CR01B	999		0.0325358	0.000199912	0.00180614	4.02333e-05			0.154532		107_23CR01B	999		0.0567244	1.08698	0.0540158	296.066	0.0223371	1.43028	1.02161	0.203449	31.3993
	109_23CR01B	999		0.0533708	0.0806553	0.000188386	0.995836	14.2465	88.8261	2.4181	47.2023	1.11748	5.30913	17.0834		109_23CR01B	999		18.6588	0.434079	565.494	13.1544			0.958323		109_23CR01B	999		0.0329956	0.000221608	0.00176837	4.11353e-05			0.144027		109_23CR01B	999		0.0533922	1.13638	0.0806553	160.887	0.0223084	1.23798	0.995891	0.237558	30.1817
	110_23CR01B	999		0.053829	-0.118289	0	0.985078	13.9394	87.8838	2.12885	46.4471	1.10541	-3.58091	8.74236		110_23CR01B	999		18.3001	0.359937	557.518	11.0287			0.949604		110_23CR01B	999		0.0328243	0.000205588	0.00179366	3.54819e-05			0.176349		110_23CR01B	999		0.0537977	0.959025	-0.118289	122.069	0.0217519	1.44381	0.984998	0.208226	30.0115
	111_23CR01B	999	4	0.0577266	0.317084	0	0.976156	13.407	85.3588	2.77632	43.7527	1.0954	1.32377	1.17307		111_23CR01B	999	4	16.91	0.415686	530.81	13.1065			0.968783		111_23CR01B	999	4	0.0318569	0.000196142	0.00188391	4.65165e-05			0.142366		111_23CR01B	999	4	0.0578103	1.209	0.317084	44.3073	0.0218477	1.58186	0.976369	0.201374	30.6427
	112_23CR01B	999	4	0.0674163	0.185405	0.000616452	0.967226	13.383	85.9779	2.83592	39.9354	1.08538	2.24324	3.98578		112_23CR01B	999	4	14.3471	0.305113	497.073	10.6219			0.960098		112_23CR01B	999	4	0.0288631	0.000173844	0.00201178	4.29897e-05			0.157889		112_23CR01B	999	4	0.0674656	1.04165	0.185405	88.8396	0.0250375	1.18137	0.96735	0.19937	33.5116
	114_23CR01B	999	4	0.0520744	0.195369	0.000218351	0.944596	12.8004	84.2451	2.75248	45.1535	1.05998	2.07902	2.7754		114_23CR01B	999	4	18.1394	0.474524	544.369	14.2796			0.969897		114_23CR01B	999	4	0.0333218	0.000214195	0.00183699	4.81871e-05			0.133652		114_23CR01B	999	4	0.0521261	1.28695	0.195369	66.7473	0.0214734	1.06235	0.944728	0.216473	28.3485
	115_23CR01B	999	4	0.0557755	0.0836258	0	0.935598	12.6993	84.3805	2.97055	43.2648	1.04989	4.8108	18.8369		115_23CR01B	999	4	16.7744	0.439238	526.245	13.8682			0.973559		115_23CR01B	999	4	0.0318755	0.000192629	0.00190025	5.00778e-05			0.14239		115_23CR01B	999	4	0.0557976	1.29314	0.0836258	195.777	0.0217521	1.09751	0.935654	0.185648	29.3524
	116_23CR01B	999	4	0.0551112	0.225418	0	0.924343	12.5575	84.4525	2.54887	43.2833	1.03726	1.76325	2.47616		116_23CR01B	999	4	16.7723	0.369905	526.417	11.6738			0.957994		116_23CR01B	999	4	0.0318613	0.00020427	0.00189964	4.21263e-05			0.163447		116_23CR01B	999	4	0.0551707	1.07846	0.225418	70.2156	0.0211165	1.20859	0.924494	0.210989	29.0122
	117_23CR01B	999	4	0.0497815	-0.00683728	0	0.894873	12.3311	85.6335	2.38978	45.3439	1.00419	-56.279	3629.33		117_23CR01B	999	4	17.976	0.406205	546.265	12.2729			0.962751		117_23CR01B	999	4	0.0329071	0.000202422	0.00183061	4.11282e-05			0.115673		117_23CR01B	999	4	0.0497797	1.09925	-0.00683728	3224.41	0.0200674	1.26962	0.894869	0.233145	27.1947
	119_23CR01B	999	4	0.0500686	0.25836	0	0.870782	11.8315	84.4641	2.30552	44.1791	0.977152	1.44928	1.92198		119_23CR01B	999	4	17.3918	0.365881	534.866	11.1366			0.953351		119_23CR01B	999	4	0.0325162	0.000207987	0.00186963	3.8928e-05			0.119609		119_23CR01B	999	4	0.0501368	1.01637	0.25836	66.3074	0.0198576	1.21867	0.870956	0.249521	26.7807
	120_23CR01B	999	4	0.0509	-0.0243116	0	0.879971	11.5982	81.9901	2.81659	43.2839	0.987463	-15.5641	222.068		120_23CR01B	999	4	17.2882	0.449287	526.423	13.5882			0.969494		120_23CR01B	999	4	0.0328409	0.000210177	0.00189961	4.90334e-05			0.0964098		120_23CR01B	999	4	0.0508936	1.27208	-0.0243116	713.4	0.0196911	1.34756	0.879954	0.249811	26.7957
	121_23CR01B	999	4	0.0525238	0.0863453	0	0.860815	11.5468	83.4108	2.7156	42.4063	0.965968	4.28686	15.0484		121_23CR01B	999	4	16.389	0.386141	518.4	12.2468			0.974176		121_23CR01B	999	4	0.0316147	0.000169521	0.00192901	4.55714e-05			0.125271		121_23CR01B	999	4	0.0525466	1.1613	0.0863453	175.518	0.0201828	1.06225	0.860873	0.179064	27.2291
	122_23CR01B	999	4	0.0500884	-0.0564098	0	0.840885	10.9832	81.2674	2.53323	42.3435	0.943603	-6.40989	38.1842		122_23CR01B	999	4	16.788	0.376933	517.836	11.5631			0.961703		122_23CR01B	999	4	0.0324196	0.000200939	0.00193111	4.3121e-05			0.118906		122_23CR01B	999	4	0.0500735	1.09465	-0.0564098	297.854	0.01949	0.818627	0.840847	0.233928	25.9383
	123_23CR01B	999	4	0.0496444	0.0991478	0.000614734	0.84008	10.9714	81.2581	2.74035	42.5347	0.9427	3.64339	12.8027		123_23CR01B	999	4	16.9219	0.417169	519.559	12.7354			0.967073		123_23CR01B	999	4	0.0325698	0.00020551	0.00192471	4.71785e-05			0.106373		123_23CR01B	999	4	0.0496709	1.20451	0.0991478	175.698	0.0201461	1.13871	0.840147	0.241248	25.7939
			S	41.3495	31.1484	0.293294	89.1143	13761																																S	41.3579	0.0679301	31.1484	4.50981	9.15787	0.0564427	89.1352	0.0261633	26106.4
	Information on Analysis				Results		40(r)/39(k)	± 2s	Age	± 2s	MSWD	39Ar(k)	K/Ca	± 2s		Results			40(a)/36(a)	± 2s	40(r)/39(k)	± 2s	Age	± 2s	MSWD		Results			40(a)/36(a)	± 2s	40(r)/39(k)	± 2s	Age	± 2s	MSWD		Information on Analysis and Constants Used in Calculations									Results		40(a)/36(a)
									(Ma)			(%,n)											(Ma)											(Ma)
	Sample = 003_23CR01B				Age Plateau		13.4912	0.166078	83.8808	1.01455	1.59642	11.149	1.53805	0.855196		Normal Isochron			326.983	50.7855	11.7982	3.01419	73.5635	18.4214	1.57552		Inverse Isochron			325.711	51.1395	11.8844	2.6132	74.0902	15.9662	1.55881		Sample = 003_23CR01B				Age Equations = Min et al. (2000)					Age Plateau
	Material = Quartz							0.0123101		0.0120952	0.100663	11								0.155316		0.255478		0.250415	0.116075						0.157009		0.219884		0.215497	0.121288		Material = Quartz				Negative Intensities = Allowed
	Location = R1 Rursee				Full External Error					2.0021	1.89443	2σ Confidence Limit				Full External Error								18.4837			Full External Error								16.0391			Location = R1 Rursee				Decay Constant 40K = 5.460 ± 0.053 E-10 1/a					Full External Error
	Analyst = Klaudia Kuiper				Analytical Error					1.00928	1.26349	Error Magnification				Analytical Error								18.4212			Analytical Error								15.9659			Analyst = Klaudia Kuiper				Decay Constant 39Ar = 2.940 ± 0.016 E-07 1/h					Analytical Error
	Project = VU123																																					Project = VU123				Decay Constant 37Ar = 8.230 ± 0.012 E-04 1/h
	Mass Discrimination Law = LIN				Total Fusion Age		154.42	0.282289	786.443	1.41938		83	1.23021	0.110962																								Mass Discrimination Law = LIN				Decay Constant 36Cl = 2.257 ± 0.015 E-06 1/a					Total Fusion Age
	Irradiation = VU123							0.00182806		0.00180481						Statistics			2σ Confidence Limit	1.94281		Convergence	9.53307e-05				Statistics			2σ Confidence Limit	1.94281		Convergence	3.37885e-05				Irradiation = VU123				Decay Activity 40K(EC,β⁺) = 3.310 ± 0.030 1/gs
	J = 0.00347370 ± 0.00000219				Full External Error					14.1947									Error Magnification	1.2552		Number of Iterations	13							Error Magnification	1.24852		Number of Iterations	4				J = 0.00347370 ± 0.00000219				Decay Activity 40K(β⁻) = 27.890 ± 0.150 1/gs					Full External Error
	DRA = 25.522 ± 0.079 Ma				Analytical Error					1.16867									Number of Data Points	11		Calculated Line	Weighted York-2							Number of Data Points	11		Calculated Line	Weighted York-2				DRA = 25.522 ± 0.079 Ma				Atmospheric Ratio 40/36(a) = 298.56 ± 0.31					Analytical Error
																														Spreading Factor	0.0529976							IGSN = Undefined				Atmospheric Ratio 38/36(a) = 0.1885 ± 0.0003
																																						Preferred Age = Undefined				Production Ratio 39/37(ca) = 0.000673 ± 0.000004					Normal Isochron		326.983
																																						Classification = Undefined				Production Ratio 36/37(ca) = 0.000264 ± 0.000002
																																						Experiment Type = Undefined				Production Ratio 40/39(k) = 0.000860 ± 0.000070					Full External Error
																																						Extraction Method = Undefined				Production Ratio 38/39(k) = 0.012110 ± 0.000030					Analytical Error
																																						Heating = 180 sec				Production Ratio 36/38(cl) = 262.80 ± 1.71
																																						Isolation = 5.00 min				Scaling Ratio K/Ca = 0.430
																																						Instrument = HELIX				Abundance Ratio 40K/K = 1.1700 ± 0.0100 E-04
																																						Lithology = Undefined				Atomic Weight K = 39.0983 ± 0.0001 g					Inverse Isochron		325.711
																																						Lat-Lon = Undefined - Undefined
																																						Feature = Undefined									Full External Error
																																															Analytical Error
[truncated: 150 more columns]

## Sheet: Rursee 2 BPV
	Incremental Crushing			36Ar(a) [fA]	37Ar(ca) [fA]	38Ar(cl) [fA]	39Ar(k) [fA]	40Ar(r) [fA]	Age	± 2s	40Ar(r)	39Ar(k)	K/Ca	± 2s		Normal Isochron			39(k)/36(a)	± 2s	40(a+r)/36(a)	± 2s			r.i.		Inverse Isochron			39(k)/40(a+r)	± 2s	36(a)/40(a+r)	± 2s			r.i.		Relative Abundances			36Ar [fA]	%1s	37Ar [fA]	%1s	38Ar [fA]	%1s	39Ar [fA]	%1s	40Ar [fA]
									(Ma)		(%)	(%)
	003_23CR02A	1		0.355234	0.211954	0.00448718	0.00990955	275.424	8404.2	178.97	72.1983	0.0167433	0.0201039	0.00558527		003_23CR02A	1		0.0278958	0.00276165	1073.89	10.4076			0.0842006		003_23CR02A	1		2.59764e-05	2.56274e-06	0.000931194	9.02467e-06			0.0137423		003_23CR02A	1		0.355292	0.449327	0.211954	12.9869	0.0715688	0.464875	0.0100522	4.85603	381.482
	004_23CR02A	3		0.914268	0.264904	0.00876923	0.0279353	853.183	8575.08	89.3231	75.7613	0.0471999	0.0453454	0.0108539		004_23CR02A	3		0.0305548	0.00150609	1231.75	7.95187			0.0910889		004_23CR02A	3		2.48061e-05	1.21862e-06	0.000811855	5.24115e-06			0.0400164		004_23CR02A	3		0.914342	0.269169	0.264904	11.7146	0.181447	0.410903	0.0281135	2.43316	1126.15
	005_23CR02A	5		2.4298	0.376422	0.0199585	0.073419	2323.55	8639.62	48.5062	76.2071	0.12405	0.0838691	0.0124981		005_23CR02A	5		0.030216	0.000801298	1254.83	6.15728			0.0882121		005_23CR02A	5		2.40798e-05	6.39079e-07	0.00079692	3.91038e-06			0.096743		005_23CR02A	5		2.42991	0.169393	0.376422	7.33397	0.478866	0.293627	0.0736723	1.31032	3048.99
	013_23CR02A	7		2.50339	0.236962	0.0187784	0.0809303	2173.87	8342.36	36.8011	74.4149	0.136741	0.146859	0.0298114		013_23CR02A	7		0.0323283	0.0006474	1166.93	5.88602			0.127504		013_23CR02A	7		2.77037e-05	5.54571e-07	0.00085695	4.32248e-06			0.124421		013_23CR02A	7		2.50346	0.179433	0.236962	10.1018	0.491647	0.13271	0.0810897	0.982943	2921.28
	014_23CR02A	9		1.8174	0.212794	0.0131649	0.0688715	1906.85	8397.23	69.5142	77.848	0.116366	0.139171	0.0359195		014_23CR02A	9		0.0378956	0.00145107	1347.78	7.31143			0.0804085		014_23CR02A	9		2.81171e-05	1.07518e-06	0.00074196	4.02498e-06			0.0613467		014_23CR02A	9		1.81746	0.204337	0.212794	12.7636	0.356579	0.257472	0.0690147	1.89949	2449.46
	016_23CR02A	11		1.63415	0.172834	0.0144679	0.061873	1648.29	8327.39	43.9242	77.1606	0.104542	0.153936	0.0560289		016_23CR02A	11		0.0378625	0.000912819	1307.21	7.01819			0.124451		016_23CR02A	11		2.89643e-05	6.96253e-07	0.000764986	4.10707e-06			0.0985285		016_23CR02A	11		1.6342	0.200669	0.172834	18.16	0.323254	0.28678	0.0619893	1.1859	2136.18
	017_23CR02A	13		1.01846	0.151446	0.0083247	0.0474864	1314.04	8396.24	67.0442	81.2083	0.0802338	0.134828	0.0472511		017_23CR02A	13		0.0466257	0.00172617	1588.78	9.45015			0.10147		017_23CR02A	13		2.93468e-05	1.08278e-06	0.000629413	3.74377e-06			0.0593953		017_23CR02A	13		1.0185	0.236338	0.151446	17.4263	0.20088	0.255122	0.0475883	1.83163	1618.11
	019_23CR02A	17		1.02609	0.151259	0.0137551	0.0554976	1240.84	8010.41	42.4521	80.1996	0.0937697	0.157769	0.0705335		019_23CR02A	17		0.0540865	0.00126015	1507.85	7.76802			0.109009		019_23CR02A	17		3.587e-05	8.36014e-07	0.000663197	3.4166e-06			0.112068		019_23CR02A	17		1.02614	0.180851	0.151259	22.3238	0.207845	0.361969	0.0555994	1.14798	1547.19
	020_23CR02A	21		0.981908	0.147145	0.00795702	0.0594417	1199.63	7825.41	48.9287	80.3617	0.100434	0.173705	0.0803045		020_23CR02A	21		0.0605369	0.00163495	1520.3	8.03748			0.107024		020_23CR02A	21		3.98191e-05	1.07348e-06	0.000657766	3.47746e-06			0.0888881		020_23CR02A	21		0.98195	0.195445	0.147145	23.0765	0.193767	0.326363	0.0595407	1.33338	1492.79
	021_23CR02A	25		0.655923	0.0955587	0.00576333	0.0569818	856.495	7294.79	35.7132	81.3905	0.0962774	0.25641	0.157242		021_23CR02A	25		0.0868727	0.00174427	1604.35	10.3671			0.223123		021_23CR02A	25		5.41484e-05	1.06523e-06	0.000623307	4.02775e-06			0.100748		021_23CR02A	25		0.655951	0.269008	0.0955587	30.6469	0.130095	0.468823	0.0570461	0.965498	1052.33
	023_23CR02A	30		0.656459	0.0887908	0.00752653	0.0663905	871.654	7052.11	32.6985	81.6426	0.112174	0.321519	0.225035		023_23CR02A	30		0.101134	0.00185274	1626.37	9.72257			0.209863		023_23CR02A	30		6.2184e-05	1.12169e-06	0.000614865	3.67571e-06			0.118274		023_23CR02A	30		0.656485	0.239692	0.0887908	34.9844	0.132073	0.5627	0.0664502	0.882704	1067.65
	024_23CR02A	35		0.661268	0.0853415	0.00826765	0.0782171	903.682	6823.39	37.2154	82.0701	0.132157	0.394103	0.337834		024_23CR02A	35		0.118284	0.00250388	1665.15	11.5101			0.238976		024_23CR02A	35		7.10348e-05	1.46605e-06	0.000600547	4.1512e-06			0.0898124		024_23CR02A	35		0.661294	0.295654	0.0853415	42.8491	0.133864	0.5727	0.0782746	1.01506	1101.11
	025_23CR02A	40		0.525886	0.092519	0.00620821	0.0805566	712.99	6349.03	34.1636	81.953	0.13611	0.374402	0.235187		025_23CR02A	40		0.153183	0.00301041	1654.35	11.5479			0.262307		025_23CR02A	40		9.25939e-05	1.76409e-06	0.000604468	4.2194e-06			0.0958107		025_23CR02A	40		0.525913	0.299912	0.092519	31.3944	0.106313	0.521243	0.0806188	0.934689	869.998
	027_23CR02A	50		0.479837	0.0715649	0.00497957	0.0953192	669.279	5940.03	29.6075	82.3688	0.161053	0.572729	0.501121		027_23CR02A	50		0.198649	0.00343792	1693.36	11.9335			0.302581		027_23CR02A	50		0.00011731	1.94668e-06	0.000590541	4.16166e-06			0.109109		027_23CR02A	50		0.479858	0.303723	0.0715649	43.7411	0.0965832	0.409697	0.0953674	0.809553	812.539
	028_23CR02A	60		0.44055	0.0903552	0.00560164	0.111962	605.644	5483.75	23.1416	82.1575	0.189172	0.532825	0.309098		028_23CR02A	60		0.254141	0.00354299	1673.3	11.9619			0.383946		028_23CR02A	60		0.000151879	1.97402e-06	0.00059762	4.27217e-06			0.138185		028_23CR02A	60		0.440577	0.309267	0.0903552	28.9988	0.0900012	0.386251	0.112023	0.624141	737.175
	029_23CR02A	70		0.423846	0.0568401	0.00717557	0.126887	584.474	5205.46	25.4159	82.2025	0.21439	0.95991	0.912564		029_23CR02A	70		0.29937	0.00494788	1677.54	16.0538			0.497663		029_23CR02A	70		0.000178458	2.56953e-06	0.000596112	5.70471e-06			0.0933903		029_23CR02A	70		0.423864	0.443582	0.0568401	47.5287	0.0886071	0.584395	0.126925	0.696866	711.018
	031_23CR02A	80		0.399559	0.0533716	0.00591144	0.151868	546.884	4784.34	24.2292	82.093	0.256599	1.22356	1.48244		031_23CR02A	80		0.380089	0.00561733	1667.28	11.6012			0.345018		031_23CR02A	80		0.00022797	3.19056e-06	0.00059978	4.17338e-06			0.132841		031_23CR02A	80		0.399576	0.297805	0.0533716	60.5753	0.0830675	0.583171	0.151904	0.675962	666.177
	032_23CR02A	90		0.353151	0.0748224	0.00539322	0.15804	499.601	4564.48	19.6628	82.5735	0.267027	0.908245	0.756514		032_23CR02A	90		0.447513	0.00555767	1713.26	12.2056			0.428095		032_23CR02A	90		0.000261206	2.96943e-06	0.000583684	4.15829e-06			0.159016		032_23CR02A	90		0.353173	0.307689	0.0748224	41.6435	0.073876	0.621279	0.15809	0.539006	605.038
	033_23CR02A	100		0.307207	0.0377804	0.00348697	0.190301	433.377	4021.96	16.8348	82.5328	0.321536	2.16592	3.16437		033_23CR02A	100		0.619456	0.00713557	1709.26	13.2402			0.5268		033_23CR02A	100		0.000362411	3.60014e-06	0.000585048	4.53187e-06			0.168907		033_23CR02A	100		0.307218	0.342783	0.0377804	73.0476	0.0637	0.507629	0.190326	0.462663	525.097
	035_23CR02A	120		0.285781	0.00761509	0.00338073	0.222649	405.458	3662.98	11.7142	82.6148	0.376192	12.5723	126.225		035_23CR02A	120		0.77909	0.00792109	1717.33	15.8259			0.763703		035_23CR02A	120		0.000453664	3.04952e-06	0.000582299	5.36614e-06			0.215827		035_23CR02A	120		0.285785	0.42293	0.00761509	501.996	0.0599468	0.83192	0.222655	0.281782	490.781
	036_23CR02A	140		0.241908	0.0561112	0.00270315	0.237292	333.253	3259.4	13.9154	82.1878	0.400933	1.81846	1.9929		036_23CR02A	140		0.980917	0.0105442	1676.16	13.7665			0.614466		036_23CR02A	140		0.000585217	5.0514e-06	0.000596602	4.89994e-06			0.186293		036_23CR02A	140		0.241924	0.368227	0.0561112	54.795	0.0511765	0.613224	0.23733	0.391309	405.478
	037_23CR02A	180		0.275404	0.0804947	0.00348237	0.314943	402.593	3117.39	11.0323	83.04	0.532133	1.68242	1.33666		037_23CR02A	180		1.14357	0.00970007	1760.39	12.6422			0.631243		037_23CR02A	180		0.000649613	4.43539e-06	0.000568057	4.07952e-06			0.267605		037_23CR02A	180		0.275427	0.31001	0.0804947	39.7234	0.05921	0.871583	0.314998	0.28925	484.817
	039_23CR02A	230		0.307283	0.0893848	0.00308071	0.375468	444.026	3001.72	13.0573	82.8764	0.634397	1.80625	1.36467		039_23CR02A	230		1.2219	0.0149612	1743.57	18.086			0.745265		039_23CR02A	230		0.000700803	5.78785e-06	0.000573537	5.94931e-06			0.151087		039_23CR02A	230		0.307308	0.486408	0.0893848	37.7745	0.0655505	0.705589	0.375528	0.371595	535.769
	040_23CR02A	290		0.292486	0.0614197	0.00299861	0.450381	422.365	2667.62	10.045	82.867	0.760971	3.15312	2.9118		040_23CR02A	290		1.53984	0.0117946	1742.61	11.1192			0.567746		040_23CR02A	290		0.000883638	5.85392e-06	0.000573851	3.66162e-06			0.306735		040_23CR02A	290		0.292503	0.263355	0.0614197	46.1724	0.0635863	0.568976	0.450422	0.277979	509.69
	041_23CR02A	370		0.333189	0.0863335	0.00486772	0.545369	472.617	2557.79	10.1378	82.6117	0.921465	2.71631	2.38124		041_23CR02A	370		1.63682	0.0171828	1717.03	16.4343			0.783098		041_23CR02A	370		0.000953286	6.3553e-06	0.000582402	5.57438e-06			0.202598		041_23CR02A	370		0.333214	0.443475	0.0863335	43.8312	0.0742782	0.656598	0.545427	0.280634	572.094
	049_23CR02A	470		0.33175	0.101217	0.00343867	0.631975	466.816	2342.16	7.68382	82.4962	1.0678	2.68481	2.02443		049_23CR02A	470		1.90498	0.0158825	1705.69	14.3284			0.822013		049_23CR02A	470		0.00111683	5.57694e-06	0.000586272	4.92489e-06			0.309785		049_23CR02A	470		0.331778	0.379334	0.101217	37.7011	0.0736267	0.625777	0.632043	0.17271	565.864
	050_23CR02A	590		0.323947	0.0974486	0.00348306	0.735763	422.421	2021.31	6.69696	81.3695	1.24316	3.24661	2.39767		050_23CR02A	590		2.27124	0.0154747	1602.54	11.4748			0.785029		050_23CR02A	590		0.00141728	6.50952e-06	0.000624009	4.46812e-06			0.394454		050_23CR02A	590		0.323974	0.309387	0.0974486	36.9254	0.0734572	0.572865	0.735829	0.142453	519.139
	051_23CR02A	750		0.311973	0.112473	0.00437068	0.901582	373.956	1645.62	7.17175	80.0592	1.52333	3.44688	2.28461		051_23CR02A	750		2.88994	0.0244549	1497.24	12.0548			0.760048		051_23CR02A	750		0.00193018	1.10653e-05	0.000667896	5.37746e-06			0.282543		051_23CR02A	750		0.312005	0.359752	0.112473	33.1396	0.0740958	0.506496	0.901658	0.222584	467.099
	053_23CR02A	200		0.15822	0.0198085	0.00258655	0.502935	161.536	1382.67	7.16925	77.3734	0.849767	10.9176	35.8218		053_23CR02A	200		3.17871	0.0375725	1319.52	15.2109			0.872996		053_23CR02A	200		0.002409	1.41898e-05	0.000757853	8.73625e-06			0.205218		053_23CR02A	200		0.158226	0.545276	0.0198085	164.055	0.0385015	0.767064	0.502948	0.227775	208.774
	054_23CR02A	350		0.242065	-0.024614	0.00238977	0.901207	229.648	1170.31	5.15956	76.0627	1.52269	-15.7439	48.6216		054_23CR02A	350		3.723	0.0254888	1247.27	8.9704			0.780846		054_23CR02A	350		0.00298493	1.39052e-05	0.000801753	5.76625e-06			0.396296		054_23CR02A	350		0.242059	0.310012	-0.024614	154.414	0.0589326	0.556968	0.90119	0.145094	301.92
	055_23CR02A	500		0.287465	0.0576883	0.0015511	1.22556	226.137	914.713	4.62373	72.4882	2.07072	9.13512	13.2533		055_23CR02A	500		4.26333	0.0345165	1085.22	9.26329			0.857922		055_23CR02A	500		0.00392854	1.74945e-05	0.000921474	7.86558e-06			0.357053		055_23CR02A	500		0.287481	0.384956	0.0576883	72.54	0.0705797	0.481889	1.2256	0.12506	311.963
	057_23CR02A	700		0.337536	0.091872	0.00281009	1.70086	219.169	683.552	3.77475	68.502	2.8738	7.96076	6.1695		057_23CR02A	700		5.03905	0.0325262	947.881	6.56603			0.774024		057_23CR02A	700		0.00531613	2.40293e-05	0.00105499	7.30795e-06			0.427179		057_23CR02A	700		0.337561	0.294111	0.091872	38.7492	0.087033	0.411291	1.70092	0.132801	319.945
	058_23CR02A	900		0.38162	0.0679476	0.00220565	2.25474	207.685	513.192	2.96666	64.5739	3.80964	14.2689	15.976		058_23CR02A	900		5.90833	0.0325343	842.778	5.38234			0.784916		058_23CR02A	900		0.00701054	2.79561e-05	0.00118655	7.57783e-06			0.517659		058_23CR02A	900		0.381639	0.262667	0.0679476	55.9819	0.101446	0.499019	2.25478	0.0824305	321.623
	059_23CR02A	250		0.0515428	0.0103075	0.000410632	0.379293	32.3	479.1	5.41839	67.7306	0.64086	15.8231	106.654		059_23CR02A	250		7.3588	0.13423	925.223	17.1159			0.917758		059_23CR02A	250		0.00795354	5.929e-05	0.00108082	1.99944e-05			0.235913		059_23CR02A	250		0.0515457	0.879669	0.0103075	337.019	0.0147197	1.87707	0.3793	0.239901	47.6889
	061_23CR02A	500		0.112001	0.0587815	0.000987528	0.831857	61.9411	425.369	3.72851	64.9408	1.40552	6.08522	7.17299		061_23CR02A	500		7.42722	0.0913873	851.6	10.6786			0.902827		061_23CR02A	500		0.00872149	4.78021e-05	0.00117426	1.47246e-05			0.261033		061_23CR02A	500		0.112017	0.58998	0.0587815	58.9376	0.0321735	0.839853	0.831896	0.173898	95.3808
	062_23CR02A	750		0.138197	0.0613162	0.00149098	1.29922	82.3528	368.028	2.9398	66.6208	2.19518	9.11117	10.5117		062_23CR02A	750		9.40115	0.110049	894.467	10.7532			0.91364		062_23CR02A	750		0.0105103	5.1924e-05	0.00111798	1.34404e-05			0.268593		062_23CR02A	750		0.138214	0.566845	0.0613162	57.6856	0.0432747	0.726239	1.29926	0.145364	123.614
	063_23CR02A	999		0.179242	0.062446	0.00183759	1.83856	98.2647	314.986	2.42972	64.7412	3.10646	12.6603	13.9205		063_23CR02A	999		10.2574	0.101765	846.782	8.74945			0.89657		063_23CR02A	999		0.0121134	5.60036e-05	0.00118094	1.22022e-05			0.310957		063_23CR02A	999		0.17926	0.47927	0.062446	54.977	0.0578898	0.661775	1.8386	0.127664	151.781
	065_23CR02A	999		0.159853	0.107331	0.000989178	1.80449	83.8848	276.911	2.4738	63.7364	3.0489	7.22933	4.7899		065_23CR02A	999		11.2884	0.138658	823.322	10.4226			0.930659		065_23CR02A	999		0.0137108	6.38783e-05	0.00121459	1.53758e-05			0.263533		065_23CR02A	999		0.159882	0.601347	0.107331	33.128	0.0529739	0.6916	1.80456	0.124115	131.612
	066_23CR02A	999		0.133478	0.0719065	0	1.82754	75.7339	248.799	1.90754	65.5212	3.08784	10.9287	10.6292		066_23CR02A	999		13.6916	0.12773	865.947	8.60388			0.886925		066_23CR02A	999		0.0158112	7.30238e-05	0.00115481	1.14739e-05			0.359789		066_23CR02A	999		0.133497	0.453232	0.0719065	48.6296	0.0470705	0.686523	1.82759	0.109765	115.587
	067_23CR02A	999		0.132748	0.0481434	0.000387214	1.84504	68.528	224.509	2.006	63.3564	3.1174	16.4792	21.3409		067_23CR02A	999		13.8988	0.155335	814.787	9.45533			0.907884		067_23CR02A	999		0.0170582	8.3703e-05	0.00122731	1.42426e-05			0.297141		067_23CR02A	999		0.132761	0.542471	0.0481434	64.7506	0.0477536	0.647432	1.84507	0.133761	108.163
	069_23CR02A	999		0.113318	0.0749896	0.000846051	1.78565	62.5991	212.609	2.17105	64.9147	3.01706	10.2391	9.21184		069_23CR02A	999		15.7578	0.243529	850.979	13.5048			0.953863		069_23CR02A	999		0.0185173	8.84251e-05	0.00117512	1.86488e-05			0.236279		069_23CR02A	999		0.113338	0.764583	0.0749896	44.9833	0.0438307	0.697306	1.7857	0.110641	96.4329
	070_23CR02A	999		0.109234	0.0340002	0.00191139	1.7841	59.4303	202.587	2.15207	64.5669	3.01444	22.5635	50.6784		070_23CR02A	999		16.3329	0.259717	842.627	13.7222			0.952924		070_23CR02A	999		0.0193833	9.59978e-05	0.00118677	1.93265e-05			0.228589		070_23CR02A	999		0.109243	0.785312	0.0340002	112.302	0.0441073	0.915257	1.78412	0.123399	92.0446
	071_23CR02A	999		0.0998182	0.0701405	2.90386e-05	1.7552	53.6031	186.56	2.06853	64.2674	2.96562	10.7604	9.86225		071_23CR02A	999		17.584	0.288398	835.567	14.0504			0.954144		071_23CR02A	999		0.0210444	0.000106196	0.00119679	2.01245e-05			0.231131		071_23CR02A	999		0.0998367	0.810893	0.0701405	45.8265	0.0401003	0.978916	1.75525	0.120949	83.4063
	073_23CR02A	999		0.0888894	0.108432	0.000764207	1.69001	49.2961	178.583	1.84955	65.0032	2.85548	6.70196	4.47538		073_23CR02A	999		19.0125	0.281914	853.138	13.1028			0.943641		073_23CR02A	999		0.0222854	0.000113526	0.00117214	1.80022e-05			0.268205		073_23CR02A	999		0.0889184	0.732649	0.108432	33.3884	0.0379859	0.808734	1.69009	0.111418	75.8364
	074_23CR02A	999		0.100832	0.0440685	0.000906782	1.6615	45.8223	169.284	1.72723	60.3497	2.8073	16.2121	25.8179		074_23CR02A	999		16.478	0.182733	753.004	8.91339			0.909015		074_23CR02A	999		0.021883	0.000108195	0.00132801	1.57198e-05			0.355274		074_23CR02A	999		0.100844	0.546036	0.0440685	79.6252	0.0400343	0.74606	1.66153	0.0955521	75.928
	075_23CR02A	999		0.09006	0.0455643	0.00197198	1.62112	42.5136	161.328	2.26607	61.2559	2.73907	15.2988	26.9763		075_23CR02A	999		18.0004	0.350248	770.618	15.3476			0.965861		075_23CR02A	999		0.0233584	0.000120628	0.00129766	2.58442e-05			0.217361		075_23CR02A	999		0.0900729	0.967119	0.0455643	88.1644	0.03858	0.637427	1.62115	0.103828	69.4033
	082_23CR02A	999		0.0734594	0.0346495	0	1.5199	37.5958	152.539	1.85926	63.1553	2.56804	18.8619	34.886		082_23CR02A	999		20.6903	0.334858	810.35	13.4907			0.933932		082_23CR02A	999		0.0255325	0.000152806	0.00123404	2.05442e-05			0.256138		082_23CR02A	999		0.0734686	0.792968	0.0346495	92.4775	0.0319324	1.16437	1.51992	0.160437	59.5291
	083_23CR02A	999		0.0717427	0.0484036	0.000721119	1.508	36.8497	150.765	2.07696	63.239	2.54793	13.3965	18.985		083_23CR02A	999		21.0195	0.416492	812.196	16.4111			0.95482		083_23CR02A	999		0.0258798	0.00015599	0.00123123	2.48781e-05			0.213446		083_23CR02A	999		0.0717558	0.97734	0.0484036	70.858	0.0325065	1.05022	1.50803	0.160728	58.2705
	084_23CR02A	999		0.0766074	0.0453552	8.31273e-05	1.48977	34.2895	142.338	1.80536	59.9858	2.51715	14.1241	19.5297		084_23CR02A	999		19.4469	0.285815	746.16	11.5362			0.935074		084_23CR02A	999		0.0260626	0.000142963	0.0013402	2.07204e-05			0.313154		084_23CR02A	999		0.0766194	0.728635	0.0453552	69.1357	0.0325648	0.865866	1.4898	0.0939476	57.1627
	086_23CR02A	999		0.0729612	0.0157779	6.8169e-05	1.40212	31.4405	138.806	1.88894	59.0709	2.36905	38.2125	152.813		086_23CR02A	999		19.2174	0.292428	729.48	11.5759			0.924198		086_23CR02A	999		0.0263439	0.000160315	0.00137084	2.17534e-05			0.296658		086_23CR02A	999		0.0729654	0.746809	0.0157779	199.952	0.0308011	1.05115	1.40213	0.144776	53.225
	087_23CR02A	999		0.0676897	0.0241831	0	1.40811	30.3086	133.439	1.89863	59.9942	2.37916	25.0376	78.3815		087_23CR02A	999		20.8024	0.347755	746.318	12.8558			0.925128		087_23CR02A	999		0.0278733	0.000183582	0.00133991	2.30809e-05			0.26726		087_23CR02A	999		0.0676961	0.815882	0.0241831	156.528	0.0296282	0.847298	1.40812	0.180667	50.5193
	088_23CR02A	999		0.0684139	0.0400275	0.00103253	1.40287	30.1521	133.252	1.96299	59.6139	2.37031	15.0705	28.6689		088_23CR02A	999		20.5056	0.362145	739.29	13.587			0.946802		088_23CR02A	999		0.0277369	0.000164208	0.00135265	2.48596e-05			0.279927		088_23CR02A	999		0.0684249	0.876249	0.0400275	95.1161	0.0309173	0.948693	1.4029	0.107121	50.5789
	090_23CR02A	999		0.0642331	0.0296906	0	1.33781	27.0884	125.793	1.93261	58.548	2.26039	19.3751	46.8689		090_23CR02A	999		20.8275	0.359262	720.28	12.9727			0.935935		090_23CR02A	999		0.0289158	0.000183759	0.00138835	2.5005e-05			0.293665		090_23CR02A	999		0.0642409	0.852367	0.0296906	120.951	0.0281232	0.970809	1.33783	0.130118	46.2669
	091_23CR02A	999		0.0735295	0.00748275	0.000741365	1.33964	27.124	125.787	1.9841	55.267	2.26348	76.983	680.1		091_23CR02A	999		18.2191	0.284053	667.447	10.9194			0.927102		091_23CR02A	999		0.0272967	0.000167779	0.00149825	2.45112e-05			0.310016		091_23CR02A	999		0.0735318	0.768769	0.00748275	441.721	0.0308247	1.46735	1.33964	0.128493	49.0782
	092_23CR02A	999		0.102119	0.00899578	0	1.32516	25.7679	120.965	2.61909	45.8033	2.239	63.3427	561.745		092_23CR02A	999		12.9766	0.211726	550.892	9.15059			0.918321		092_23CR02A	999		0.0235556	0.000156887	0.00181524	3.0152e-05			0.244308		092_23CR02A	999		0.102121	0.788712	0.00899578	443.417	0.035108	0.734419	1.32516	0.208145	56.2577
	094_23CR02A	999		0.0646433	0.00705825	0.000247414	1.25217	23.2108	115.487	1.9489	54.5985	2.11568	76.284	843.211		094_23CR02A	999		19.3704	0.30742	657.619	11.1089			0.925478		094_23CR02A	999		0.0294553	0.000188613	0.00152064	2.56876e-05			0.344311		094_23CR02A	999		0.0646453	0.787402	0.00705825	552.678	0.0275964	0.824418	1.25217	0.0969154	42.5118
	095_23CR02A	999		0.0663312	0.00652286	0.000558505	1.23493	22.5444	113.79	2.2113	53.2344	2.08656	81.4093	804.679		095_23CR02A	999		18.6177	0.344661	638.436	12.3731			0.941924		095_23CR02A	999		0.0291614	0.000189942	0.00156633	3.03558e-05			0.298277		095_23CR02A	999		0.0663332	0.919043	0.00652286	494.218	0.028017	1.10559	1.23494	0.109222	42.3493
	096_23CR02A	999		0.0599016	-0.01156	0.000528316	1.21166	21.6084	111.238	2.11027	54.7136	2.04724	-45.0705	297.503		096_23CR02A	999		20.2275	0.378313	659.291	12.9109			0.934749		096_23CR02A	999		0.0306807	0.000213825	0.00151678	2.97031e-05			0.301389		096_23CR02A	999		0.0598988	0.925039	-0.01156	330.042	0.026493	1.1915	1.21165	0.13635	39.4937
	098_23CR02A	999		0.0610023	0.0279927	0	1.16235	20.3563	109.297	2.1214	52.7774	1.96393	17.855	44.0594		098_23CR02A	999		19.0542	0.330292	632.257	11.5038			0.914181		098_23CR02A	999		0.0301368	0.000223244	0.00158163	2.87775e-05			0.316977		098_23CR02A	999		0.0610097	0.848778	0.0279927	123.381	0.0255357	1.1237	1.16237	0.174279	38.5701
	099_23CR02A	999		0.0637728	0.027383	0.000575233	1.18204	20.5675	108.612	1.94562	51.9269	1.99719	18.5617	46.2857		099_23CR02A	999		18.5351	0.27156	621.072	9.706			0.888656		099_23CR02A	999		0.0298437	0.000215086	0.00161012	2.51627e-05			0.36187		099_23CR02A	999		0.0637802	0.712993	0.027383	124.681	0.0269108	1.14883	1.18205	0.1672	39.6085
	100_23CR02A	999		0.0558756	0.0210649	0	1.15708	19.3631	104.574	2.08794	53.7172	1.95502	23.6196	89.676		100_23CR02A	999		20.7081	0.383529	645.098	12.5691			0.922809		100_23CR02A	999		0.0321007	0.000241585	0.00155015	3.02033e-05			0.317968		100_23CR02A	999		0.0558812	0.912134	0.0210649	189.834	0.0240219	1.60794	1.15709	0.1582	36.0463
	102_23CR02A	999		0.0541106	0.0234728	0.000342994	1.11468	18.6126	104.351	2.71416	53.5325	1.88338	20.4199	60.9368		102_23CR02A	999		20.6	0.550824	642.533	17.6008			0.957633		102_23CR02A	999		0.0320605	0.000253442	0.00155634	4.26324e-05			0.225996		102_23CR02A	999		0.054117	1.32396	0.0234728	149.209	0.0240416	1.33756	1.11469	0.184058	34.7688
	103_23CR02A	999		0.0535166	0.0452828	0.000325072	1.12236	18.2238	101.55	2.20123	53.2819	1.89637	10.6578	15.4519		103_23CR02A	999		20.9723	0.423585	639.087	13.5077			0.928763		103_23CR02A	999		0.032816	0.000257771	0.00156473	3.30721e-05			0.302653		103_23CR02A	999		0.0535287	0.995234	0.0452828	72.4908	0.0240048	1.51317	1.1224	0.169204	34.2027
	104_23CR02A	999	4	0.0559013	0.0114558	1.40073e-05	1.10713	17.6111	99.5413	2.37464	51.3413	1.87062	41.5567	232.995		104_23CR02A	999	4	19.805	0.422018	613.598	13.7103			0.944162		104_23CR02A	999	4	0.0322768	0.000237719	0.00162973	3.64147e-05			0.302128		104_23CR02A	999	4	0.0559044	1.05995	0.0114558	280.334	0.0239587	1.15889	1.10713	0.106329	34.3019
	106_23CR02A	999	4	0.0521071	0.0360206	0.000537336	1.05551	16.228	96.2953	2.28278	51.0538	1.7834	12.6002	25.3093		106_23CR02A	999	4	20.2565	0.407897	609.995	12.9036			0.919276		106_23CR02A	999	4	0.0332077	0.000277447	0.00163936	3.46783e-05			0.31628		106_23CR02A	999	4	0.0521168	0.989058	0.0360206	100.432	0.0231417	1.32429	1.05553	0.186438	31.786
	107_23CR02A	999	4	0.0525573	0.0216721	8.9968e-05	1.07005	16.4658	96.3766	2.20716	51.2024	1.80798	21.2311	74.455		107_23CR02A	999	4	20.3597	0.392817	611.852	12.5701			0.925762		107_23CR02A	999	4	0.0332755	0.000258644	0.00163438	3.35773e-05			0.345154		107_23CR02A	999	4	0.0525631	0.957507	0.0216721	175.345	0.0229553	1.20743	1.07007	0.11508	32.1582
	108_23CR02A	999	4	0.0519146	0.0290759	0.000610786	1.05553	15.8965	94.3765	2.29094	50.6306	1.78344	15.6101	39.2146		108_23CR02A	999	4	20.332	0.413094	604.765	12.9871			0.925755		108_23CR02A	999	4	0.0336197	0.000273389	0.00165354	3.55091e-05			0.327808		108_23CR02A	999	4	0.0519225	1.00456	0.0290759	125.607	0.0231791	0.988466	1.05555	0.148992	31.397
			S	24.5666	4.8753	0.232335	59.185	25735																																S	24.568	0.0476591	4.8753	5.70542	5.57821	0.0688817	59.1883	0.0216862	33069.7
	Information on Analysis				Results		40(r)/39(k)	± 2s	Age	± 2s	MSWD	39Ar(k)	K/Ca	± 2s		Results			40(a)/36(a)	± 2s	40(r)/39(k)	± 2s	Age	± 2s	MSWD		Results			40(a)/36(a)	± 2s	40(r)/39(k)	± 2s	Age	± 2s	MSWD		Information on Analysis and Constants Used in Calculations									Results		40(a)/36(a)
									(Ma)			(%,n)											(Ma)											(Ma)
	Sample = 003_23CR02A				Age Plateau Error Mean		15.4227	0.342362	96.589	2.08942	3.33716	7.24543	14.2796	20.3691		Normal Isochron Overestimated Error			859.395	826.393	-12.3456	40.9064	-81.168	274.997	0.193679		Inverse Isochron Overestimated Error			858.002	860.165	-12.2752	33.4478	-80.6945	224.797	0.193816		Sample = 003_23CR02A				Age Equations = Min et al. (2000)					Age Plateau Error Mean
	Material = Quartz							0.0221986		0.0216321	0.0184688	4								0.961599		3.31343		3.388	0.823922						1.00252		2.72483		2.78578	0.823809		Material = Quartz				Negative Intensities = Allowed
	Location = R2 Rursee				Full External Error					2.88008	2.63299	2σ Confidence Limit				Full External Error								275.002			Full External Error								224.804			Location = R2 Rursee				Decay Constant 40K = 5.460 ± 0.053 E-10 1/a					Full External Error
	Analyst = Klaudia Kuiper				Analytical Error					2.08855	1.82679	Error Magnification				Analytical Error								274.997			Analytical Error								224.797			Analyst = Klaudia Kuiper				Decay Constant 39Ar = 2.940 ± 0.016 E-07 1/h					Analytical Error
	Project = VU123																																					Project = VU123				Decay Constant 37Ar = 8.230 ± 0.012 E-04 1/h
	Mass Discrimination Law = LIN				Total Fusion Age		434.823	0.473309	1697.34	1.39687		67	5.2201	0.595662																								Mass Discrimination Law = LIN				Decay Constant 36Cl = 2.257 ± 0.015 E-06 1/a					Total Fusion Age
	Irradiation = VU123							0.00108851		0.000822978						Statistics			2σ Confidence Limit	3		Convergence	0.000108268				Statistics			2σ Confidence Limit	3		Convergence	0.00010608				Irradiation = VU123				Decay Activity 40K(EC,β⁺) = 3.310 ± 0.030 1/gs
	J = 0.00351130 ± 0.00000112				Full External Error					26.4243									Error Magnification	1		Number of Iterations	7							Error Magnification	1		Number of Iterations	5				J = 0.00351130 ± 0.00000112				Decay Activity 40K(β⁻) = 27.890 ± 0.150 1/gs					Full External Error
	DRA = 25.522 ± 0.079 Ma				Analytical Error					1.20416									Number of Data Points	4		Calculated Line	Weighted York-2							Number of Data Points	4		Calculated Line	Weighted York-2				DRA = 25.522 ± 0.079 Ma				Atmospheric Ratio 40/36(a) = 298.56 ± 0.31					Analytical Error
																														Spreading Factor	0.0164856							IGSN = Undefined				Atmospheric Ratio 38/36(a) = 0.1885 ± 0.0003
																																						Preferred Age = Undefined				Production Ratio 39/37(ca) = 0.000673 ± 0.000004					Normal Isochron Overestimated Error		859.395
																																						Classification = Undefined				Production Ratio 36/37(ca) = 0.000264 ± 0.000002
																																						Experiment Type = Undefined				Production Ratio 40/39(k) = 0.000860 ± 0.000070					Full External Error
																																						Extraction Method = Undefined				Production Ratio 38/39(k) = 0.012110 ± 0.000030					Analytical Error
																																						Heating = 180 sec				Production Ratio 36/38(cl) = 262.80 ± 1.71
																																						Isolation = 5.00 min				Scaling Ratio K/Ca = 0.430
																																						Instrument = HELIX				Abundance Ratio 40K/K = 1.1700 ± 0.0100 E-04
																																						Lithology = Undefined				Atomic Weight K = 39.0983 ± 0.0001 g					Inverse Isochron Overestimated Error		858.002
																																						Lat-Lon = Undefined - Undefined
																																						Feature = Undefined									Full External Error
																																															Analytical Error
[truncated: 150 more columns]

## Sheet: Rursee 2.1 BNV
	`
	Incremental Crushing			36Ar(a) [fA]	37Ar(ca) [fA]	38Ar(cl) [fA]	39Ar(k) [fA]	40Ar(r) [fA]	Age	± 2s	40Ar(r)	39Ar(k)	K/Ca	± 2s		Normal Isochron			39(k)/36(a)	± 2s	40(a+r)/36(a)	± 2s			r.i.		Inverse Isochron			39(k)/40(a+r)	± 2s	36(a)/40(a+r)	± 2s			r.i.		Relative Abundances			36Ar [fA]	%1s	37Ar [fA]	%1s	38Ar [fA]	%1s	39Ar [fA]	%1s	40Ar [fA]
									(Ma)		(%)	(%)
	003_22CR21A	1		1.26054	0.00884608	0.0099426	0.00490472	245.606	9460.73	429.02	39.4895	0.0524915	0.238414	0.158142		003_22CR21A	1		0.00389096	0.000916922	493.402	2.05226			0.0165793		003_22CR21A	1		7.88599e-06	1.85811e-06	0.00202675	8.43008e-06			0.00107131		003_22CR21A	1		1.26055	0.201561	0.00884608	31.0024	0.247614	0.368391	0.00491068	11.7667	621.954
	004_22CR21A	3		2.04352	0.0152782	0.0102763	0.00490633	610.232	11119.7	460.206	50.0048	0.0525087	0.138087	0.0608568		004_22CR21A	3		0.00240092	0.000605008	597.177	2.37975			0.0140639		004_22CR21A	3		4.02044e-06	1.01301e-06	0.00167454	6.67304e-06			0.00175036		004_22CR21A	3		2.04353	0.1879	0.0152782	18.0792	0.39554	0.195965	0.00491661	12.5717	1220.35
	005_22CR21A	5		4.68407	0.0246281	0.0106156	0.0188428	1523.17	10333.3	135.139	52.134	0.20166	0.32899	0.0699125		005_22CR21A	5		0.00402273	0.000297829	623.741	2.6093			0.0499586		005_22CR21A	5		6.44936e-06	4.76902e-07	0.00160323	6.70682e-06			0.00655289		005_22CR21A	5		4.68408	0.196679	0.0246281	9.96158	0.893792	0.210563	0.0188593	3.69334	2921.65
	011_22CR21A	7		3.23619	0.0183918	0.0113568	0.0145876	1450.46	10711	214.914	60.0192	0.15612	0.341058	0.0938857		011_22CR21A	7		0.00450764	0.000530863	746.759	2.77166			0.0296468		011_22CR21A	7		6.03627e-06	7.10579e-07	0.00133912	4.97027e-06			0.00186968		011_22CR21A	7		3.2362	0.179993	0.0183918	12.442	0.621556	0.193818	0.0146	5.88073	2416.65
	012_22CR21A	9		3.20954	0.0199168	0.0179754	0.0196876	1339.19	10018.6	129.001	58.2907	0.210701	0.425051	0.0983819		012_22CR21A	9		0.00613407	0.000434273	715.812	2.60235			0.0497718		012_22CR21A	9		8.56939e-06	6.05935e-07	0.00139701	5.07888e-06			0.0015816		012_22CR21A	9		3.20955	0.178958	0.0199168	11.0198	0.623213	0.244264	0.019701	3.5329	2297.43
	014_22CR21A	11		2.02299	0.0129946	0.0135578	0.0156221	962.764	9838.74	203.485	61.4499	0.167191	0.516944	0.173465		014_22CR21A	11		0.00772227	0.000862666	774.472	2.81434			0.0311758		014_22CR21A	11		9.97102e-06	1.11334e-06	0.0012912	4.69208e-06			0.00135407		014_22CR21A	11		2.02299	0.177874	0.0129946	15.8219	0.39508	0.259442	0.0156308	5.57961	1566.75
	015_22CR21A	13		1.43804	0.0134791	0.0121192	0.0171579	782.29	9290.14	147.013	64.5651	0.183628	0.54736	0.225594		015_22CR21A	13		0.0119315	0.000965246	842.559	3.90604			0.0557482		015_22CR21A	13		1.4161e-05	1.14383e-06	0.00118686	5.5022e-06			0.00155926		015_22CR21A	13		1.43804	0.228625	0.0134791	20.2079	0.283397	0.240284	0.017167	4.03634	1211.63
	017_22CR21A	17		1.29761	0.0105761	0.0136351	0.0188144	692.889	8902.04	177.349	64.1384	0.201356	0.764951	0.430355		017_22CR21A	17		0.0144993	0.00141694	832.535	4.28179			0.0512773		017_22CR21A	17		1.74159e-05	1.69972e-06	0.00120115	6.17762e-06			0.00135298		017_22CR21A	17		1.29761	0.25383	0.0105761	27.7032	0.258462	0.291702	0.0188216	4.87775	1080.3
	018_22CR21A	21		1.30319	0.0116185	0.0097034	0.0208626	685.45	8694.86	128.233	63.7906	0.223276	0.772121	0.3392		018_22CR21A	21		0.0160088	0.00113269	824.538	3.8688			0.0645344		018_22CR21A	21		1.94155e-05	1.37086e-06	0.0012128	5.69055e-06			0.00178468		018_22CR21A	21		1.3032	0.231431	0.0116185	21.68	0.255608	0.32666	0.0208704	3.52879	1074.53
	019_22CR21A	25		1.1054	0.0112027	0.00879354	0.0264129	623.423	8095.68	121.069	65.386	0.282677	1.01383	0.431128		019_22CR21A	25		0.0238945	0.00160114	862.541	3.45012			0.0567999		019_22CR21A	25		2.77025e-05	1.85332e-06	0.00115936	4.6374e-06			0.00289784		019_22CR21A	25		1.1054	0.19509	0.0112027	20.9977	0.217481	0.352011	0.0264205	3.34379	953.45
	021_22CR21A	30		1.04671	0.0140906	0.00550968	0.028459	582.378	7837.82	111.302	65.0786	0.304575	0.86848	0.307634		021_22CR21A	30		0.027189	0.00167854	854.948	3.70252			0.0665809		021_22CR21A	30		3.18019e-05	1.95898e-06	0.00116966	5.06545e-06			0.00357555		021_22CR21A	30		1.04672	0.210956	0.0140906	17.4413	0.20316	0.428609	0.0284685	3.07856	894.885
	022_22CR21A	35		0.815829	0.0118466	0.00784431	0.0356367	492.897	7132.91	66.8858	66.9269	0.381393	1.29351	0.707747		022_22CR21A	35		0.0436816	0.0016376	902.727	4.43462			0.125532		022_22CR21A	35		4.83885e-05	1.79974e-06	0.00110775	5.44181e-06			0.00554787		022_22CR21A	35		0.815834	0.240408	0.0118466	27.2943	0.16206	0.444769	0.0356447	1.85857	736.471
	023_22CR21A	40		0.707897	0.00561682	0.0069535	0.0395291	427.362	6692.4	70.5978	66.91	0.42305	3.02618	2.05341		023_22CR21A	40		0.0558403	0.0022271	902.267	5.41553			0.146123		023_22CR21A	40		6.18888e-05	2.44187e-06	0.00110832	6.65229e-06			0.00441637		023_22CR21A	40		0.707899	0.295717	0.00561682	33.87	0.140871	0.345224	0.0395329	1.97193	638.712
	025_22CR21A	50		0.661812	0.0137147	0.006261	0.0488833	405.68	6222.59	58.6876	67.2468	0.523161	1.53265	0.541276		025_22CR21A	50		0.0738628	0.0024853	911.543	6.29182			0.200075		025_22CR21A	50		8.10305e-05	2.67138e-06	0.00109704	7.57219e-06			0.00516786		025_22CR21A	50		0.661817	0.340831	0.0137147	17.5811	0.131605	0.355545	0.0488925	1.64717	603.271
	026_22CR21A	60		0.591674	0.0136956	0.00430801	0.0644299	375.443	5601.12	38.3741	68.0035	0.689544	2.0229	0.713056		026_22CR21A	60		0.108894	0.00244731	933.103	5.41046			0.247579		026_22CR21A	60		0.000116701	2.54126e-06	0.00107169	6.21405e-06			0.0107554		026_22CR21A	60		0.591679	0.284	0.0136956	17.591	0.116619	0.418156	0.0644391	1.08707	552.093
	027_22CR21A	70		0.593801	0.0154566	0.00597348	0.0784155	372.977	5248.72	30.2922	67.7817	0.839221	2.1815	0.661513		027_22CR21A	70		0.132057	0.00242861	926.679	6.25697			0.356201		027_22CR21A	70		0.000142506	2.44904e-06	0.00107912	7.28628e-06			0.0117134		027_22CR21A	70		0.593806	0.332528	0.0154566	15.1376	0.118855	0.603163	0.0784259	0.857181	550.263
	029_22CR21A	80		0.488779	0.0125161	0.00587401	0.0871478	321.966	4815.94	26.3864	68.8115	0.932676	2.99403	1.12544		029_22CR21A	80		0.178297	0.00294531	957.275	6.55068			0.399763		029_22CR21A	80		0.000186255	2.82057e-06	0.00104463	7.14847e-06			0.0158028		029_22CR21A	80		0.488784	0.336113	0.0125161	18.7795	0.0990642	0.472661	0.0871562	0.754398	467.896
	030_22CR21A	90		0.384634	0.013479	0.0024634	0.0963645	260.395	4291.21	29.8642	69.3959	1.03132	3.07416	0.967625		030_22CR21A	90		0.250535	0.00474471	975.554	6.94153			0.357759		030_22CR21A	90		0.000256813	4.54254e-06	0.00102506	7.29378e-06			0.0192305		030_22CR21A	90		0.384638	0.347162	0.013479	15.7133	0.0761339	0.638928	0.0963735	0.880892	375.231
	031_22CR21A	100		0.352748	0.0148557	0.00310272	0.103834	241.421	4044.35	29.4604	69.6265	1.11125	3.00547	0.936064		031_22CR21A	100		0.294356	0.00568493	982.962	8.09105			0.40886		031_22CR21A	100		0.000299458	5.27893e-06	0.00101733	8.37398e-06			0.0190006		031_22CR21A	100		0.352753	0.403099	0.0148557	15.5479	0.0708531	0.878488	0.103844	0.877408	346.738
	033_22CR21A	120		0.353818	0.0196571	0.0043568	0.12352	240.398	3757.48	24.6838	69.4723	1.32195	2.70201	0.706756		033_22CR21A	120		0.349107	0.00579789	977.998	7.31332			0.428302		033_22CR21A	120		0.000356961	5.35862e-06	0.0010225	7.64607e-06			0.0242953		033_22CR21A	120		0.353824	0.364654	0.0196571	13.057	0.0725474	0.607328	0.123534	0.745953	346.034
	034_22CR21A	140		0.318384	0.0175601	0.00238686	0.135403	222.889	3493.3	20.3186	70.1028	1.44912	3.31566	1.02485		034_22CR21A	140		0.425282	0.00636134	998.624	8.82152			0.56617		034_22CR21A	140		0.000425868	5.25311e-06	0.00100138	8.84585e-06			0.0295858		034_22CR21A	140		0.31839	0.432457	0.0175601	15.4427	0.0640421	0.54411	0.135415	0.610129	317.946
	035_22CR21A	180		0.328107	0.024452	0.00331163	0.161043	229.823	3273.15	18.304	70.1144	1.72352	2.83201	0.629812		035_22CR21A	180		0.490825	0.00683397	999.012	8.49402			0.584828		035_22CR21A	180		0.00049131	5.55172e-06	0.00100099	8.51083e-06			0.0318242		035_22CR21A	180		0.328114	0.416025	0.024452	11.1055	0.06711	0.812655	0.16106	0.558127	327.783
	037_22CR21A	230		0.337495	0.0351852	0.00320926	0.184956	241.472	3138.52	13.8071	70.5574	1.97944	2.26035	0.294628		037_22CR21A	230		0.548025	0.00604736	1014.04	7.57045			0.641688		037_22CR21A	230		0.000540436	4.57862e-06	0.000986153	7.36224e-06			0.0454081		037_22CR21A	230		0.337505	0.363525	0.0351852	6.50407	0.0690669	0.907492	0.184979	0.414988	342.234
	038_22CR21A	290		0.344261	0.0378698	0.00356145	0.191866	250.095	3136.13	14.7678	70.873	2.0534	2.17858	0.274942		038_22CR21A	290		0.557329	0.00616207	1025.03	6.52217			0.537475		038_22CR21A	290		0.000543719	5.0746e-06	0.000975581	6.20752e-06			0.0450377		038_22CR21A	290		0.344271	0.307447	0.0378698	6.29337	0.0707781	0.867718	0.191892	0.459375	352.878
	039_22CR21A	370		0.348601	0.044101	0.00379232	0.203215	233.354	2948.19	15.7963	69.1558	2.17485	1.98142	0.230105		039_22CR21A	370		0.582945	0.00739467	967.962	7.93319			0.618357		039_22CR21A	370		0.000602239	6.00754e-06	0.0010331	8.46703e-06			0.0352767		039_22CR21A	370		0.348613	0.40088	0.044101	5.78573	0.0719645	0.60665	0.203245	0.491413	337.433
	047_22CR21A	470		0.297158	0.0466625	0.00322542	0.221643	212.449	2688.51	12.2847	70.5415	2.37208	2.04247	0.27818		047_22CR21A	470		0.745878	0.00804557	1013.5	7.33612			0.661273		047_22CR21A	470		0.000735946	5.95549e-06	0.000986684	7.14204e-06			0.0130337		047_22CR21A	470		0.297171	0.359259	0.0466625	6.79801	0.0619237	0.782279	0.221675	0.40219	301.168
	048_22CR21A	590		0.216504	0.0392621	0.0027372	0.192676	161.963	2506.4	11.2867	71.4744	2.06206	2.11019	0.330518		048_22CR21A	590		0.889939	0.00856081	1046.64	5.96029			0.576229		048_22CR21A	590		0.000850282	6.68611e-06	0.000955438	5.44092e-06			0.0192815		048_22CR21A	590		0.216515	0.280904	0.0392621	7.82173	0.0458816	0.866039	0.192702	0.390361	226.602
	049_22CR21A	750		0.16423	0.0345365	0.00108272	0.175666	123.24	2265.45	12.3211	71.5377	1.88001	2.18714	0.333738		049_22CR21A	750		1.06963	0.0140836	1048.97	10.7897			0.768246		049_22CR21A	750		0.0010197	8.59659e-06	0.000953318	9.8058e-06			0.0202387		049_22CR21A	750		0.164239	0.509986	0.0345365	7.6182	0.0341674	0.809197	0.175689	0.416233	172.272
	051_22CR21A	200		0.145803	0.0211055	0.00115824	0.148847	92.8137	2114.94	16.3936	68.0729	1.593	3.03258	0.765628		051_22CR21A	200		1.02088	0.0175258	935.131	12.0638			0.743682		051_22CR21A	200		0.0010917	1.25302e-05	0.00106937	1.37956e-05			0.0116448		051_22CR21A	200		0.145808	0.641659	0.0211055	12.6105	0.0304446	1.27294	0.148861	0.570063	136.345
	052_22CR21A	350		0.204837	0.0336805	0.0019865	0.233901	132.813	1999.28	7.69989	68.4711	2.50326	2.98622	0.512396		052_22CR21A	350		1.14189	0.00997193	946.944	6.77475			0.801576		052_22CR21A	350		0.00120587	6.29895e-06	0.00105603	7.55518e-06			0.0295392		052_22CR21A	350		0.204846	0.353822	0.0336805	8.57553	0.0434308	0.766388	0.233924	0.255815	193.969
	053_22CR21A	500		0.253353	0.0421431	0.0037497	0.327883	147.853	1730.03	9.65254	66.1552	3.50908	3.34551	0.402344		053_22CR21A	500		1.29417	0.015803	882.146	9.10526			0.837897		053_22CR21A	500		0.00146708	9.779e-06	0.0011336	1.17007e-05			0.0135426		053_22CR21A	500		0.253365	0.5138	0.0421431	6.00416	0.0554775	0.671739	0.327912	0.32974	223.495
	055_22CR21A	700		0.209422	0.0356598	0.00180366	0.320357	116.504	1499.55	7.67559	65.0753	3.42853	3.86299	0.641205		055_22CR21A	700		1.52972	0.0142101	854.871	5.9912			0.736155		055_22CR21A	700		0.00178941	1.12544e-05	0.00116977	8.1981e-06			0.027017		055_22CR21A	700		0.209432	0.346125	0.0356598	8.29355	0.0451592	0.722907	0.320381	0.309678	179.029
	056_22CR21A	900		0.184599	0.0294612	0.00223684	0.302243	81.1906	1210.34	8.43047	59.5655	3.23467	4.41137	0.818454		056_22CR21A	900		1.63729	0.018576	738.382	6.84074			0.799003		056_22CR21A	900		0.00221741	1.51345e-05	0.00135431	1.2547e-05			0.0292103		056_22CR21A	900		0.184607	0.458193	0.0294612	9.27061	0.0406939	0.682345	0.302262	0.334409	136.305
	057_22CR21A	500		0.081615	0.0186164	0.00109434	0.175375	34.4869	956.208	10.5764	58.5973	1.8769	4.05079	0.991504		057_22CR21A	500		2.14881	0.0359253	721.116	10.5374			0.841761		057_22CR21A	500		0.00297984	2.69428e-05	0.00138674	2.0264e-05			0.0596669		057_22CR21A	500		0.0816202	0.716973	0.0186164	12.2308	0.0186026	1.64455	0.175387	0.429704	58.854
	059_22CR21A	999		0.0746773	0.0121571	0.000447175	0.177583	31.3243	877.843	11.0729	58.4189	1.90053	6.28114	2.69427		059_22CR21A	999		2.378	0.0454992	718.022	12.4094			0.875675		059_22CR21A	999		0.00331188	3.06502e-05	0.00139271	2.40699e-05			0.0570644		059_22CR21A	999		0.0746807	0.850794	0.0121571	21.4429	0.0166744	1.99593	0.177591	0.43736	53.6201
	060_22CR21A	999		0.0576348	0.017049	0.000635213	0.180307	26.2844	752.62	10.3612	60.435	1.92969	4.5476	1.70969		060_22CR21A	999		3.12845	0.0647336	754.611	13.879			0.852963		060_22CR21A	999		0.00414578	4.48827e-05	0.00132519	2.43732e-05			0.0686161		060_22CR21A	999		0.0576394	0.900779	0.017049	18.7909	0.0136829	1.96343	0.180319	0.508744	43.492
	061_22CR21A	999		0.0568922	0.014544	0.000488933	0.181321	23.0142	671.034	10.8162	57.5354	1.94054	5.36083	1.9921		061_22CR21A	999		3.1871	0.0686544	703.083	12.9009			0.809881		061_22CR21A	999		0.00453303	5.74256e-05	0.00142231	2.60979e-05			0.0712874		061_22CR21A	999		0.0568961	0.894526	0.014544	18.5704	0.0134089	2.5024	0.181331	0.599787	40.0001
	063_22CR21A	999		0.0566116	0.0126231	6.59999e-05	0.184082	19.1613	567.072	9.57999	53.1322	1.97009	6.27066	2.76695		063_22CR21A	999		3.25167	0.0632015	637.029	11.2441			0.850862		063_22CR21A	999		0.00510442	5.2434e-05	0.00156979	2.77081e-05			0.108344		063_22CR21A	999		0.0566149	0.854215	0.0126231	22.0578	0.0129665	2.53235	0.184091	0.463322	36.0634
	064_22CR21A	999		0.0585894	0.0147859	0	0.185439	16.7411	501.19	10.2275	48.9024	1.98461	5.39289	2.03673		064_22CR21A	999		3.16507	0.0647096	584.296	11.104			0.873947		064_22CR21A	999		0.00541689	5.41766e-05	0.00171146	3.25248e-05			0.113614		064_22CR21A	999		0.0585933	0.921297	0.0147859	18.8783	0.0131999	2.01101	0.185449	0.44279	34.2337
	065_22CR21A	999		0.0542613	0.0113121	4.38601e-05	0.184711	14.7287	449.28	8.50764	47.6208	1.97682	7.02129	3.5418		065_22CR21A	999		3.4041	0.0580295	570	8.81738			0.808109		065_22CR21A	999		0.0059721	6.08138e-05	0.00175439	2.71387e-05			0.166286		065_22CR21A	999		0.0542643	0.729854	0.0113121	25.218	0.012509	1.95567	0.184718	0.44015	30.9291
	067_22CR21A	999		0.0480823	0.0146275	0	0.181998	12.3647	389.352	10.7151	46.2746	1.94779	5.35016	2.33868		067_22CR21A	999		3.78514	0.0920433	555.717	12.7112			0.876502		067_22CR21A	999		0.00681127	8.04383e-05	0.00179948	4.11603e-05			0.132064		067_22CR21A	999		0.0480861	1.10391	0.0146275	21.8502	0.0111761	1.70442	0.182008	0.509364	26.7203
	068_22CR21A	999		0.046725	0.0120347	0.00018822	0.181055	10.9497	350.422	10.3247	43.9746	1.93769	6.4691	3.36322		068_22CR21A	999		3.87491	0.0899136	532.904	12.0392			0.896187		068_22CR21A	999		0.00727131	7.59898e-05	0.00187651	4.23934e-05			0.171899		068_22CR21A	999		0.0467282	1.08366	0.0120347	25.9912	0.0111885	2.38326	0.181063	0.414199	24.9001
	069_22CR21A	999		0.0476613	0.0124157	0.000146583	0.179346	10.2262	332.097	10.5147	41.8145	1.9194	6.21137	3.09564		069_22CR21A	999		3.76293	0.0848975	513.12	11.5858			0.917117		069_22CR21A	999		0.00733342	6.73897e-05	0.00194886	4.40037e-05			0.205411		069_22CR21A	999		0.0476646	1.08066	0.0124157	24.9171	0.0113026	1.89647	0.179354	0.323342	24.4561
	071_22CR21A	999		0.0495464	0.0119591	0.000613868	0.175912	8.9058	297.724	10.514	37.5796	1.88265	6.32504	2.88081		071_22CR21A	999		3.55045	0.0754525	478.307	9.9657			0.879827		071_22CR21A	999		0.00742295	7.66381e-05	0.00209071	4.35607e-05			0.207049		071_22CR21A	999		0.0495496	0.986814	0.0119591	22.7697	0.0120836	2.48508	0.17592	0.393858	23.6985
	072_22CR21A	999		0.0584111	0.0101952	0	0.177578	8.12573	271.112	10.0997	31.7844	1.90048	7.48967	3.97148		072_22CR21A	999		3.04014	0.0572112	437.673	7.25153			0.756851		072_22CR21A	999		0.00694615	8.69485e-05	0.00228481	3.78557e-05			0.185779		072_22CR21A	999		0.0584138	0.768049	0.0101952	26.5075	0.0130791	2.16349	0.177585	0.543482	25.5651
	073_22CR21A	999		0.0482715	0.00931632	0.000606489	0.173357	7.48818	256.94	9.79554	34.1922	1.85531	8.0014	4.8247		073_22CR21A	999		3.5913	0.0739477	453.686	8.38092			0.759194		073_22CR21A	999		0.00791581	0.000108443	0.00220417	4.07174e-05			0.207345		073_22CR21A	999		0.0482741	0.849624	0.00931632	30.1435	0.011805	1.77625	0.173363	0.581365	21.9003
	075_22CR21A	999		0.044123	0.0113368	0.000300018	0.169428	6.63036	234.261	11.6194	33.4801	1.81325	6.42631	3.43892		075_22CR21A	999		3.83989	0.0967996	448.83	10.956			0.864003		075_22CR21A	999		0.00855534	0.000110893	0.00222802	5.43862e-05			0.202869		075_22CR21A	999		0.0441261	1.15282	0.0113368	26.7517	0.010669	2.64166	0.169435	0.509442	19.8039
	076_22CR21A	999		0.0477943	0.00774173	0.000446935	0.162142	6.2454	230.798	14.3862	30.4431	1.73528	9.00586	6.67898		076_22CR21A	999		3.39249	0.0941395	429.232	11.8566			0.918209		076_22CR21A	999		0.00790362	8.85077e-05	0.00232974	6.43538e-05			0.191369		076_22CR21A	999		0.0477965	1.32642	0.00774173	37.0791	0.0114197	2.36617	0.162147	0.406825	20.515
	077_22CR21A	999		0.0423747	0.00843558	0.000146595	0.165546	5.82757	212.035	12.2071	31.536	1.77171	8.43864	5.26584		077_22CR21A	999		3.90672	0.103833	436.085	11.3674			0.874346		077_22CR21A	999		0.00895862	0.000118298	0.00229313	5.9775e-05			0.214209		077_22CR21A	999		0.042377	1.23054	0.00843558	31.1967	0.010139	1.99658	0.165552	0.50157	18.4791
	085_22CR21A	999		0.0414875	0.00951554	0	0.154878	5.18779	202.305	10.5871	29.519	1.65754	6.99882	3.58042		085_22CR21A	999		3.73313	0.0820816	423.605	8.86719			0.795627		085_22CR21A	999		0.00881276	0.000121232	0.00236069	4.94156e-05			0.249988		085_22CR21A	999		0.04149	0.956747	0.00951554	25.573	0.00968933	2.24793	0.154884	0.541393	17.5744
	086_22CR21A	999		0.0439151	0.0119541	0	0.153232	5.17359	203.832	10.5037	28.2942	1.63993	5.5119	2.05825		086_22CR21A	999		3.48928	0.0719972	416.369	8.0874			0.776909		086_22CR21A	999		0.00838026	0.000112523	0.00240172	4.66501e-05			0.2527		086_22CR21A	999		0.0439183	0.882224	0.0119541	18.6633	0.0101042	2.17232	0.15324	0.534719	18.285
	087_22CR21A	999		0.0480735	0.00803543	0	0.14864	4.66088	190.033	12.8266	24.5131	1.59078	7.95416	4.63395		087_22CR21A	999		3.09193	0.0701742	395.513	8.58783			0.833765		087_22CR21A	999		0.00781751	0.000100359	0.00252836	5.48986e-05			0.217333		087_22CR21A	999		0.0480756	1.01346	0.00803543	29.1246	0.0107059	2.63506	0.148645	0.510436	19.0138
	089_22CR21A	999		0.0383313	0.0116815	0	0.145763	4.16614	173.988	11.6425	26.6882	1.55999	5.36557	2.40157		089_22CR21A	999		3.80272	0.0898641	407.248	9.6014			0.832157		089_22CR21A	999		0.00933759	0.0001277	0.00245551	5.78918e-05			0.28599		089_22CR21A	999		0.0383343	1.07652	0.0116815	22.3741	0.00871311	2.19447	0.145771	0.486847	15.6105
	090_22CR21A	999	4	0.0384007	0.00753012	0.000228984	0.142425	3.93383	168.398	10.6513	25.5462	1.52426	8.13301	4.62354		090_22CR21A	999	4	3.7089	0.075766	401.002	8.28662			0.791047		090_22CR21A	999	4	0.0092491	0.000122868	0.00249376	5.15329e-05			0.339137		090_22CR21A	999	4	0.0384027	0.913645	0.00753012	28.4209	0.00919228	2.62643	0.14243	0.456528	15.3989
	091_22CR21A	999	4	0.0420207	0.00968573	0.000156505	0.138787	3.85756	169.413	15.0702	23.5169	1.48533	6.16149	2.71022		091_22CR21A	999	4	3.30283	0.0937957	390.361	10.6436			0.853488		091_22CR21A	999	4	0.00846095	0.000127807	0.00256173	6.9848e-05			0.200465		091_22CR21A	999	4	0.0420233	1.28529	0.00968573	21.9849	0.00975813	2.16898	0.138794	0.603318	16.4034
	093_22CR21A	999	4	0.0355946	0.00943016	0	0.131915	3.37055	156.303	11.5807	24.0791	1.41178	6.0151	2.97918		093_22CR21A	999	4	3.70603	0.0790051	393.253	8.86743			0.824382		093_22CR21A	999	4	0.00942405	0.000123002	0.00254289	5.73396e-05			0.381152		093_22CR21A	999	4	0.0355971	0.995267	0.00943016	24.7613	0.0082886	2.2416	0.131921	0.381351	13.9978
	094_22CR21A	999	4	0.0371122	0.00742969	3.6588e-06	0.128605	3.27033	155.59	14.1252	22.7887	1.37636	7.44313	3.96876		094_22CR21A	999	4	3.4653	0.0934834	386.68	10.1607			0.820574		094_22CR21A	999	4	0.00896168	0.00014307	0.00258612	6.79546e-05			0.25933		094_22CR21A	999	4	0.0371142	1.20583	0.00742969	26.6537	0.00855672	2.71503	0.12861	0.604294	14.3507
	095_22CR21A	999	4	0.0357492	0.00870232	0.000184488	0.122451	3.14045	156.864	15.7415	22.7341	1.3105	6.05055	2.81547		095_22CR21A	999	4	3.42527	0.100049	386.407	11.3179			0.868585		095_22CR21A	999	4	0.00886442	0.000132927	0.00258795	7.58014e-05			0.261377		095_22CR21A	999	4	0.0357515	1.36291	0.00870232	23.2603	0.00840609	2.50281	0.122457	0.524533	13.8138
	097_22CR21A	999	4	0.0330565	0.00852076	0	0.119779	2.89041	147.96	12.8386	22.6523	1.2819	6.04462	3.17802		097_22CR21A	999	4	3.62344	0.086013	385.998	9.41321			0.791421		097_22CR21A	999	4	0.0093872	0.000146003	0.00259069	6.31781e-05			0.360048		097_22CR21A	999	4	0.0330588	1.07014	0.00852076	26.283	0.00752534	3.17083	0.119784	0.513159	12.7599
	098_22CR21A	999	4	0.0332656	0.0102613	0	0.114384	2.61626	140.532	15.0238	20.8498	1.22416	4.79324	2.15627		098_22CR21A	999	4	3.4385	0.0935519	377.208	10.4014			0.827959		098_22CR21A	999	4	0.00911566	0.000146497	0.00265106	7.31022e-05			0.31412		098_22CR21A	999	4	0.0332683	1.24605	0.0102613	22.4862	0.00745048	2.59756	0.114391	0.545567	12.5481
	099_22CR21A	999	4	0.0329317	0.00489678	0.000142835	0.113877	2.56103	138.264	15.4241	20.6648	1.21874	9.99989	8.40148		099_22CR21A	999	4	3.45799	0.0990467	376.328	10.7101			0.815758		099_22CR21A	999	4	0.00918876	0.000159262	0.00265726	7.56239e-05			0.293888		099_22CR21A	999	4	0.032933	1.2893	0.00489678	42.0033	0.00772952	2.3839	0.113881	0.623364	12.3932
	101_22CR21A	999	4	0.0345808	0.00567582	0	0.111296	2.56611	141.619	13.1347	19.9068	1.19112	8.43179	7.14239		101_22CR21A	999	4	3.21844	0.0679483	372.766	8.249			0.763494		101_22CR21A	999	4	0.00863393	0.000128649	0.00268265	5.93647e-05			0.403351		101_22CR21A	999	4	0.0345823	0.944283	0.00567582	42.3513	0.00763021	2.54673	0.1113	0.471746	12.8907
	102_22CR21A	999	4	0.0318773	0.00877249	0.000150234	0.110825	2.79007	154.1	13.8814	22.6698	1.18608	5.4323	2.5704		102_22CR21A	999	4	3.47661	0.0853954	386.085	9.82883			0.805259		102_22CR21A	999	4	0.00900478	0.00014076	0.0025901	6.59379e-05			0.363252		102_22CR21A	999	4	0.0318797	1.1219	0.00877249	23.6532	0.0075012	3.40724	0.110831	0.499457	12.3075
	103_22CR21A	999	4	0.0340331	0.00706543	6.47057e-05	0.10794	2.44794	139.384	14.0593	19.4143	1.1552	6.5692	3.76269		103_22CR21A	999	4	3.17162	0.0731635	370.488	8.70105			0.764402		103_22CR21A	999	4	0.00856065	0.000136824	0.00269914	6.33903e-05			0.366143		103_22CR21A	999	4	0.034035	1.01745	0.00706543	28.6337	0.0077871	2.87784	0.107945	0.543149	12.609
	105_22CR21A	999	4	0.0382487	0.00407121	0.000624698	0.104488	2.44258	143.509	14.3478	17.6204	1.11826	11.036	13.9013		105_22CR21A	999	4	2.73182	0.0592374	362.42	7.50126			0.698243		105_22CR21A	999	4	0.0075377	0.000124278	0.00275923	5.71096e-05			0.33703		105_22CR21A	999	4	0.0382499	0.8851	0.00407121	62.9782	0.00909994	2.24917	0.104491	0.626133	13.8622
	106_22CR21A	999	4	0.0303721	0.00592246	0	0.104747	2.14861	126.519	15.3485	19.1556	1.12103	7.60517	6.10696		106_22CR21A	999	4	3.44879	0.0916753	369.303	10.3315			0.817613		106_22CR21A	999	4	0.00933866	0.000154358	0.00270781	7.57524e-05			0.377636		106_22CR21A	999	4	0.0303737	1.23283	0.00592246	40.147	0.00691232	3.31214	0.104751	0.496424	11.2166
	107_22CR21A	999	4	0.0301129	0.00979987	0	0.10014	2.16954	133.376	17.0501	19.4401	1.07172	4.39394	2.16184		107_22CR21A	999	4	3.32548	0.0978133	370.607	11.2216			0.832685		107_22CR21A	999	4	0.00897306	0.0001551	0.00269828	8.1701e-05			0.334797		107_22CR21A	999	4	0.0301155	1.36149	0.00979987	24.5939	0.00677997	3.0254	0.100146	0.555725	11.1601
	109_22CR21A	999	4	0.0300805	0.0101594	0.000145127	0.0974285	2.00886	127.154	16.5282	18.2794	1.0427	4.1237	1.527		109_22CR21A	999	4	3.23893	0.0865502	365.343	10.3696			0.820127		109_22CR21A	999	4	0.00886544	0.00014718	0.00273715	7.76894e-05			0.389599		109_22CR21A	999	4	0.0300832	1.24691	0.0101594	18.5087	0.00699516	3.00141	0.0974353	0.479625	10.9898
	110_22CR21A	999	4	0.0333134	0.00896016	0	0.0957059	1.99528	128.518	17.9901	16.7089	1.02427	4.59295	2.3155		110_22CR21A	999	4	2.87289	0.0811202	358.454	9.91973			0.783042		110_22CR21A	999	4	0.00801467	0.000147649	0.00278976	7.72028e-05			0.30199		110_22CR21A	999	4	0.0333158	1.23671	0.00896016	25.1979	0.00742907	3.19438	0.0957119	0.680807	11.9414
	111_22CR21A	999	4	0.0297153	0.00569863	0	0.0930734	2.0405	134.91	16.3069	18.699	0.996094	7.02302	5.04485		111_22CR21A	999	4	3.13218	0.0802724	367.228	9.89826			0.784464		111_22CR21A	999	4	0.00852923	0.000147616	0.0027231	7.33983e-05			0.395761		111_22CR21A	999	4	0.0297168	1.16387	0.00569863	35.9125	0.00667834	2.9904	0.0930773	0.535967	10.9124
	113_22CR21A	999	4	0.0283168	0.00646887	0	0.0894022	1.71754	118.749	16.347	16.8852	0.956803	5.94276	3.81565		113_22CR21A	999	4	3.15722	0.0827254	359.214	9.69519			0.731554		113_22CR21A	999	4	0.00878923	0.000171403	0.00278385	7.51361e-05			0.401088		113_22CR21A	999	4	0.0283185	1.13719	0.00646887	32.0968	0.00638102	2.83303	0.0894066	0.650344	10.1719
	114_22CR21A	999	4	0.0310249	0.00806562	0	0.088497	1.72164	120.202	17.0792	15.6734	0.947116	4.71802	2.71965		114_22CR21A	999	4	2.85245	0.0686244	354.052	9.1187			0.778457		114_22CR21A	999	4	0.00805658	0.000134191	0.00282444	7.27441e-05			0.421891		114_22CR21A	999	4	0.0310271	1.09804	0.00806562	28.8177	0.00676108	2.84254	0.0885025	0.490992	10.9845
	115_22CR21A	999		0.0583337	0.00748817	0	0.122667	3.53658	175.433	15.0006	16.8788	1.31281	7.04404	4.9608		115_22CR21A	999		2.10286	0.0378864	359.187	6.23863			0.803098		115_22CR21A	999		0.00585449	6.51012e-05	0.00278407	4.83558e-05			0.260761		115_22CR21A	999		0.0583357	0.792611	0.00748817	35.2102	0.0124243	1.86287	0.122672	0.428023	20.9528
			S	32.6948	1.11848	0.21179	9.34384	15197.8																																S	32.6951	0.0509439	1.11848	1.94015	6.48605	0.0696039	9.3446	0.0702812	24959.1
	Information on Analysis				Results		40(r)/39(k)	± 2s	Age	± 2s	MSWD	39Ar(k)	K/Ca	± 2s		Results			40(a)/36(a)	± 2s	40(r)/39(k)	± 2s	Age	± 2s	MSWD		Results			40(a)/36(a)	± 2s	40(r)/39(k)	± 2s	Age	± 2s	MSWD		Information on Analysis and Constants Used in Calculations									Results		40(a)/36(a)
									(Ma)			(%,n)											(Ma)											(Ma)
	Sample = 003_22CR21A				Age Plateau Error Mean		23.6084	1.17206	144.878	6.91625	4.33665	22.6434	5.32683	0.680478		Normal Isochron Error Chron			257.989	38.2996	35.7192	11.5634	214.973	65.6622	3.79805		Inverse Isochron Error Chron			258.184	38.3653	35.8032	8.92213	215.45	50.6508	3.81891		Sample = 003_22CR21A				Age Equations = Min et al. (2000)					Age Plateau Error Mean
	Material = quartz							0.0496457		0.0477385	1.86846e-09	19								0.148454		0.323731		0.305443	1.81823e-07						0.148597		0.249199		0.235093	1.58434e-07		Material = quartz				Negative Intensities = Allowed
	Location = R2.1 Rursee				Full External Error					7.51657	1.66667	2σ Confidence Limit				Full External Error								65.8032			Full External Error								50.8342			Location = R2.1 Rursee				Decay Constant 40K = 5.460 ± 0.053 E-10 1/a					Full External Error
	Analyst = Klaudia Kuiper				Analytical Error					6.91526	2.08246	Error Magnification				Analytical Error								65.662			Analytical Error								50.6505			Analyst = Klaudia Kuiper				Decay Constant 39Ar = 2.940 ± 0.016 E-07 1/h					Analytical Error
	Project = VU123																																					Project = VU123				Decay Constant 37Ar = 8.230 ± 0.012 E-04 1/h
	Mass Discrimination Law = LIN				Total Fusion Age		1626.5	2.66283	3474.63	2.86338		73	3.59224	0.139481																								Mass Discrimination Law = LIN				Decay Constant 36Cl = 2.257 ± 0.015 E-06 1/a					Total Fusion Age
	Irradiation = VU123							0.00163715		0.000824082						Statistics			2σ Confidence Limit	1.68599		Convergence	0.000225273				Statistics			2σ Confidence Limit	1.68599		Convergence	2.27247e-05				Irradiation = VU123				Decay Activity 40K(EC,β⁺) = 3.310 ± 0.030 1/gs
	J = 0.00348680 ± 0.00000146				Full External Error					44.7109									Error Magnification	1.94886		Number of Iterations	10							Error Magnification	1.9542		Number of Iterations	5				J = 0.00348680 ± 0.00000146				Decay Activity 40K(β⁻) = 27.890 ± 0.150 1/gs					Full External Error
	DRA = 25.522 ± 0.079 Ma				Analytical Error					2.54761									Number of Data Points	19		Calculated Line	Weighted York-2							Number of Data Points	19		Calculated Line	Weighted York-2				DRA = 25.522 ± 0.079 Ma				Atmospheric Ratio 40/36(a) = 298.56 ± 0.31					Analytical Error
																														Spreading Factor	0.0679173							IGSN = Undefined				Atmospheric Ratio 38/36(a) = 0.1885 ± 0.0003
																																						Preferred Age = Undefined				Production Ratio 39/37(ca) = 0.000673 ± 0.000004					Normal Isochron Error Chron		257.989
																																						Classification = Undefined				Production Ratio 36/37(ca) = 0.000264 ± 0.000002
																																						Experiment Type = Undefined				Production Ratio 40/39(k) = 0.000860 ± 0.000070					Full External Error
																																						Extraction Method = Undefined				Production Ratio 38/39(k) = 0.012110 ± 0.000030					Analytical Error
																																						Heating = 180 sec				Production Ratio 36/38(cl) = 262.80 ± 1.71
																																						Isolation = 5.00 min				Scaling Ratio K/Ca = 0.430
																																						Instrument = HELIX				Abundance Ratio 40K/K = 1.1700 ± 0.0100 E-04
																																						Lithology = Undefined				Atomic Weight K = 39.0983 ± 0.0001 g					Inverse Isochron Error Chron		258.184
																																						Lat-Lon = Undefined - Undefined
																																						Feature = Undefined									Full External Error
																																															Analytical Error
[truncated: 150 more columns]

## Sheet: Rursee 3 BPV
	Incremental Crushing			36Ar(a) [fA]	37Ar(ca) [fA]	38Ar(cl) [fA]	39Ar(k) [fA]	40Ar(r) [fA]	Age	± 2s	40Ar(r)	39Ar(k)	K/Ca	± 2s		Normal Isochron			39(k)/36(a)	± 2s	40(a+r)/36(a)	± 2s			r.i.		Inverse Isochron			39(k)/40(a+r)	± 2s	36(a)/40(a+r)	± 2s			r.i.		Relative Abundances			36Ar [fA]	%1s	37Ar [fA]	%1s	38Ar [fA]	%1s	39Ar [fA]	%1s	40Ar [fA]
									(Ma)		(%)	(%)
	003_23CR03A	1		0.535445	0.147188	0.0055887	0.0116994	265.658	8038.37	186.053	62.4313	0.189579	0.0341789	0.0143474		003_23CR03A	1		0.0218498	0.00224689	794.704	6.15439			0.0536284		003_23CR03A	1		2.74943e-05	2.82393e-06	0.00125833	9.74483e-06			0.0217065		003_23CR03A	1		0.535486	0.326728	0.147188	20.3518	0.106662	0.74701	0.0117984	5.08532	425.52
	004_23CR03A	3		1.50504	0.230625	0.0163053	0.0336957	1125.49	8737.48	89.3825	71.4672	0.546013	0.0628255	0.0204962		004_23CR03A	3		0.0223886	0.00109984	1046.38	5.71642			0.0623437		004_23CR03A	3		2.13963e-05	1.05031e-06	0.000955679	5.22093e-06			0.0488999		004_23CR03A	3		1.50511	0.20451	0.230625	16.1273	0.300413	0.244739	0.0338509	2.43538	1574.84
	005_23CR03A	5		2.5235	0.25775	0.0230213	0.0539599	1681.34	8611.38	71.4014	69.0558	0.874379	0.0900205	0.0282123		005_23CR03A	5		0.021383	0.000836842	964.832	4.79562			0.0613703		005_23CR03A	5		2.21624e-05	8.67579e-07	0.00103645	5.15158e-06			0.065616		005_23CR03A	5		2.52358	0.17275	0.25775	15.5483	0.499354	0.233613	0.0541334	1.94227	2434.75
	013_23CR03A	7		2.5758	0.260435	0.0310777	0.0613159	2068.8	8755.78	62.93	72.9007	0.993577	0.101237	0.0269225		013_23CR03A	7		0.0238046	0.000821326	1101.73	5.75421			0.0813994		013_23CR03A	7		2.16066e-05	7.44845e-07	0.000907666	4.74065e-06			0.070037		013_23CR03A	7		2.57589	0.191492	0.260435	13.1857	0.517359	0.163386	0.0614912	1.70918	2837.83
	014_23CR03A	9		1.96767	0.205074	0.0250998	0.0508349	1869.44	8912.15	86.7236	76.0891	0.823741	0.106591	0.0389367		014_23CR03A	9		0.0258351	0.00123125	1248.64	6.58419			0.0603294		014_23CR03A	9		2.06907e-05	9.85528e-07	0.000800873	4.22308e-06			0.0503433		014_23CR03A	9		1.96773	0.194679	0.205074	18.1095	0.39662	0.277928	0.0509729	2.36799	2456.9
	015_23CR03A	11		1.6456	0.192297	0.0214765	0.0473637	1628.91	8790.49	81.9822	76.8274	0.767492	0.105911	0.039508		015_23CR03A	11		0.028782	0.00129774	1288.42	6.96929			0.0683211		015_23CR03A	11		2.23391e-05	1.00623e-06	0.000776146	4.19832e-06			0.0516985		015_23CR03A	11		1.64566	0.204094	0.192297	18.5158	0.332245	0.246436	0.0474931	2.23849	2120.22
	016_23CR03A	13		1.20176	0.189445	0.0177073	0.0383319	1292.07	8754.02	90.5739	78.2662	0.621139	0.0870053	0.0390426		016_23CR03A	13		0.0318966	0.00159207	1373.71	8.31592			0.0792967		016_23CR03A	13		2.32193e-05	1.15633e-06	0.000727956	4.40677e-06			0.0420807		016_23CR03A	13		1.20181	0.244732	0.189445	22.299	0.244703	0.230156	0.0384594	2.47431	1650.86
	018_23CR03A	17		1.00479	0.190526	0.0157683	0.0383108	1142.47	8531.8	104.589	79.2029	0.620797	0.0864642	0.0320202		018_23CR03A	17		0.0381283	0.00219907	1435.59	8.26159			0.0616919		018_23CR03A	17		2.65594e-05	1.53002e-06	0.000696579	4.00871e-06			0.0381325		018_23CR03A	17		1.00484	0.22624	0.190526	18.2919	0.205635	0.345007	0.038439	2.86465	1442.46
	019_23CR03A	21		0.769683	0.127713	0.0124407	0.0319373	899.483	8428.17	88.4358	79.651	0.51752	0.10753	0.0733357		019_23CR03A	21		0.0414941	0.00203067	1467.2	10.2591			0.105214		019_23CR03A	21		2.82812e-05	1.37735e-06	0.00068157	4.76577e-06			0.0378487		019_23CR03A	21		0.769722	0.299996	0.127713	34.0134	0.157913	0.427443	0.0320233	2.42024	1129.28
	020_23CR03A	25		0.710334	0.149212	0.0121217	0.040312	908.277	8024.32	71.4824	81.0705	0.653225	0.116172	0.063719		020_23CR03A	25		0.0567508	0.00224415	1577.22	9.11978			0.090068		020_23CR03A	25		3.59815e-05	1.41932e-06	0.000634026	3.66605e-06			0.0562935		020_23CR03A	25		0.710379	0.226884	0.149212	27.3541	0.146508	0.437417	0.0404124	1.95807	1120.35
	021_23CR03A	30		0.720172	0.129442	0.0117533	0.0429955	886.919	7864.91	69.7113	80.4875	0.696708	0.142829	0.081607		021_23CR03A	30		0.0597016	0.00230873	1530.1	9.64646			0.109198		021_23CR03A	30		3.90182e-05	1.50205e-06	0.000653553	4.1203e-06			0.0540749		021_23CR03A	30		0.720212	0.257967	0.129442	28.5038	0.148026	0.53602	0.0430826	1.91152	1101.93
	023_23CR03A	35		0.636016	0.152792	0.0114725	0.0478244	838.683	7572.12	56.1536	81.5386	0.774958	0.134591	0.0700288		023_23CR03A	35		0.0751937	0.0023676	1617.21	11.9359			0.178122		023_23CR03A	35		4.6496e-05	1.44294e-06	0.000618349	4.56374e-06			0.0571008		023_23CR03A	35		0.636062	0.321662	0.152792	25.9697	0.131941	0.56309	0.0479273	1.5368	1028.57
	024_23CR03A	40		0.563956	0.12466	0.011816	0.0531015	769.319	7228.68	57.5538	82.0437	0.860469	0.183168	0.124354		024_23CR03A	40		0.094159	0.00303021	1662.71	10.9064			0.139556		024_23CR03A	40		5.66299e-05	1.80842e-06	0.000601429	3.94504e-06			0.0647665		024_23CR03A	40		0.563994	0.271358	0.12466	33.9083	0.118765	0.493565	0.0531854	1.58264	937.693
	025_23CR03A	50		0.411766	0.102331	0.00845535	0.0616178	560.12	6396.38	48.2126	82.002	0.998469	0.258922	0.211071		025_23CR03A	50		0.149643	0.00407719	1658.85	10.2052			0.148894		025_23CR03A	50		9.02089e-05	2.43778e-06	0.000602828	3.70858e-06			0.0775312		025_23CR03A	50		0.411796	0.249753	0.102331	40.7377	0.0868194	0.423333	0.0616867	1.33694	683.057
	026_23CR03A	60		0.450472	0.0854017	0.00957717	0.0737239	620.272	6259.24	43.7597	82.1808	1.19464	0.371202	0.334902		026_23CR03A	60		0.163659	0.00405856	1675.5	10.3073			0.162409		026_23CR03A	60		9.76779e-05	2.39913e-06	0.000596838	3.67162e-06			0.0864852		026_23CR03A	60		0.450499	0.248856	0.0854017	45.0941	0.095384	0.435345	0.0737814	1.21325	754.765
	028_23CR03A	70		0.363231	0.0755711	0.00693796	0.0872569	511.676	5624.35	42.4562	82.5121	1.41393	0.496492	0.614328		028_23CR03A	70		0.240224	0.00593112	1707.24	12.32			0.219344		028_23CR03A	70		0.000140709	3.39895e-06	0.000585741	4.22691e-06			0.0745477		028_23CR03A	70		0.363254	0.312535	0.0755711	61.8553	0.0764636	0.535155	0.0873078	1.19303	620.122
	029_23CR03A	80		0.304306	0.0881406	0.00562694	0.097288	423.819	5109.46	35.6177	82.3473	1.57648	0.474626	0.419297		029_23CR03A	80		0.319705	0.00694385	1691.3	14.8907			0.336906		029_23CR03A	80		0.000189029	3.87581e-06	0.000591261	5.20565e-06			0.072516		029_23CR03A	80		0.304332	0.401278	0.0881406	44.1598	0.0641668	0.941649	0.0973474	1.00813	514.673
	030_23CR03A	90		0.278922	0.0576489	0.00662567	0.116884	404.156	4715.57	28.8092	82.9155	1.89402	0.871832	1.03104		030_23CR03A	90		0.419056	0.00749023	1747.55	13.9901			0.355439		030_23CR03A	90		0.000239796	4.02579e-06	0.00057223	4.58102e-06			0.0984272		030_23CR03A	90		0.278941	0.356545	0.0576489	59.1248	0.060618	0.691321	0.116923	0.818977	487.431
	031_23CR03A	100		0.252774	0.0977891	0.00592768	0.124773	371.378	4463.58	29.0095	83.1109	2.02186	0.548656	0.4286		031_23CR03A	100		0.493618	0.00909864	1767.77	15.0891			0.380008		031_23CR03A	100		0.000279231	4.78e-06	0.000565683	4.82848e-06			0.0894444		031_23CR03A	100		0.252802	0.38655	0.0977891	39.0501	0.0550865	0.661454	0.124839	0.835923	446.846
	033_23CR03A	120		0.264535	0.0774058	0.00625899	0.146795	393.027	4287.54	25.2992	83.2672	2.3787	0.815465	0.754329		033_23CR03A	120		0.554916	0.00926785	1784.29	16.1687			0.450361		033_23CR03A	120		0.000311002	4.66224e-06	0.000560448	5.07861e-06			0.102732		033_23CR03A	120		0.264558	0.41274	0.0774058	46.2457	0.0579015	0.759156	0.146847	0.725464	472.007
	034_23CR03A	140		0.219667	0.0900688	0.00484175	0.164446	346.557	3896.36	17.1851	84.087	2.66472	0.785085	0.632458		034_23CR03A	140		0.748613	0.00950385	1876.21	16.9571			0.598296		034_23CR03A	140		0.000399004	4.09943e-06	0.00053299	4.81714e-06			0.140393		034_23CR03A	140		0.219693	0.414199	0.0900688	40.2767	0.0482404	0.770166	0.164506	0.480535	412.141
	035_23CR03A	180		0.229919	0.102569	0.00605737	0.189844	352.351	3693.1	16.494	83.6946	3.07628	0.795886	0.58629		035_23CR03A	180		0.825699	0.0107898	1831.06	18.1198			0.655963		035_23CR03A	180		0.000450941	4.48762e-06	0.000546132	5.40442e-06			0.133049		035_23CR03A	180		0.229949	0.460421	0.102569	36.8296	0.0516962	0.830266	0.189913	0.463139	420.996
	036_23CR03A	230		0.254025	0.100684	0.00518934	0.212607	393.517	3688.75	14.1714	83.8414	3.44513	0.907999	0.731094		036_23CR03A	230		0.836953	0.00898423	1847.69	15.3735			0.629289		036_23CR03A	230		0.000452973	3.84487e-06	0.000541216	4.50313e-06			0.184413		036_23CR03A	230		0.254054	0.374783	0.100684	40.2567	0.0556477	0.527441	0.212675	0.383797	469.359
	038_23CR03A	290		0.243068	0.0693414	0.005552	0.207598	366.935	3615.84	18.3584	83.4881	3.36397	1.28736	1.34215		038_23CR03A	290		0.854074	0.0119645	1808.16	17.6886			0.603432		038_23CR03A	290		0.000472345	5.3137e-06	0.000553049	5.41029e-06			0.118165		038_23CR03A	290		0.243089	0.454632	0.0693414	52.1252	0.0538843	0.636707	0.207645	0.53255	439.505
	039_23CR03A	370		0.243469	0.076075	0.00557676	0.218699	365.336	3527.18	15.8465	83.405	3.54385	1.23616	1.41733		039_23CR03A	370		0.898261	0.010576	1799.1	15.0765			0.579353		039_23CR03A	370		0.000499283	4.85421e-06	0.000555833	4.65789e-06			0.160333		039_23CR03A	370		0.243492	0.377963	0.076075	57.3263	0.0541191	0.67865	0.21875	0.450974	438.026
	040_23CR03A	470		0.245755	0.120386	0.00483123	0.219205	377.846	3576.34	14.2909	83.739	3.55205	0.782968	0.555049		040_23CR03A	470		0.891967	0.00952064	1836.05	14.9071			0.605583		040_23CR03A	470		0.000485807	4.20406e-06	0.000544647	4.42206e-06			0.191279		040_23CR03A	470		0.245788	0.362139	0.120386	35.443	0.0538105	0.793163	0.219286	0.391581	451.218
	041_23CR03A	590		0.227463	0.139419	0.00451996	0.200569	348.548	3589.13	18.2675	83.6931	3.25007	0.618601	0.306531		041_23CR03A	590		0.881765	0.0110649	1830.88	13.8076			0.459518		041_23CR03A	590		0.000481606	5.4353e-06	0.000546184	4.11904e-06			0.157292		041_23CR03A	590		0.227502	0.329642	0.139419	24.7704	0.0498257	0.817262	0.200663	0.533435	416.459
	049_23CR03A	750		0.21773	0.114303	0.00398207	0.182849	322.303	3611.51	17.9732	83.2161	2.96292	0.687862	0.37405		049_23CR03A	750		0.839795	0.0111814	1778.85	16.1239			0.572366		049_23CR03A	750		0.0004721	5.19915e-06	0.000562161	5.09555e-06			0.131074		049_23CR03A	750		0.217762	0.415482	0.114303	27.1844	0.0472385	0.719107	0.182926	0.519746	387.309
	050_23CR03A	200		0.11158	0.0608126	0.00260008	0.0781711	148.417	3729.18	38.4342	81.6688	1.2667	0.55274	0.560377		050_23CR03A	200		0.700583	0.0192964	1628.7	24.2218			0.505835		050_23CR03A	200		0.000430149	1.02282e-05	0.000613987	9.13115e-06			0.0395101		050_23CR03A	200		0.111597	0.719576	0.0608126	50.6773	0.0245796	1.5022	0.078212	1.17322	181.73
	051_23CR03A	350		0.190403	0.1133	0.00402922	0.124598	231.332	3693.64	21.6851	80.2738	2.01901	0.472879	0.226596		051_23CR03A	350		0.654391	0.0106808	1513.52	16.5891			0.597676		051_23CR03A	350		0.000432363	5.68176e-06	0.00066071	7.24176e-06			0.0917312		051_23CR03A	350		0.190435	0.516915	0.1133	23.9508	0.0414291	0.894004	0.124674	0.630867	288.179
	052_23CR03A	500		0.218225	0.102669	0.00367118	0.152437	271.212	3626.2	19.114	80.6302	2.47013	0.638443	0.377793		052_23CR03A	500		0.698534	0.00980818	1541.37	14.4695			0.569554		052_23CR03A	500		0.00045319	5.26814e-06	0.000648774	6.09031e-06			0.119597		052_23CR03A	500		0.218253	0.43315	0.102669	29.5819	0.0466525	0.716524	0.152506	0.552035	336.365
	054_23CR03A	700		0.254201	0.0768145	0.00272004	0.174023	271.084	3418.46	16.6809	78.127	2.81992	0.974166	0.818269		054_23CR03A	700		0.684589	0.00821151	1364.97	11.1599			0.54789		054_23CR03A	700		0.00050154	5.09648e-06	0.000732615	5.98978e-06			0.157853		054_23CR03A	700		0.254223	0.366459	0.0768145	41.9958	0.0527444	0.608012	0.174075	0.474418	346.978
	055_23CR03A	900		0.272484	0.0799941	0.00321313	0.182379	237.507	3145.24	16.8678	74.4864	2.95531	0.98036	0.825885		055_23CR03A	900		0.669322	0.00821077	1170.2	9.669			0.543567		055_23CR03A	900		0.000571972	5.95966e-06	0.000854555	7.06093e-06			0.15304		055_23CR03A	900		0.272506	0.37109	0.0799941	42.1186	0.0567849	0.651426	0.182433	0.488037	318.86
	056_23CR03A	250		0.128386	0.0246383	0.000806597	0.0866281	90.5331	2821.59	30.2681	70.2547	1.40374	1.51187	3.71192		056_23CR03A	250		0.674746	0.0154096	1003.72	12.2916			0.48164		056_23CR03A	250		0.000672244	1.34805e-05	0.000996292	1.22007e-05			0.0621641		056_23CR03A	250		0.128393	0.580238	0.0246383	122.755	0.0260565	1.00035	0.0866447	0.982962	128.864
	057_23CR03A	500		0.155482	0.0800211	0.00102184	0.120873	103.211	2537.45	22.7978	68.9767	1.95866	0.649523	0.589524		057_23CR03A	500		0.777412	0.01413	962.375	10.7473			0.539566		057_23CR03A	500		0.000807806	1.24105e-05	0.0010391	1.16041e-05			0.0885584		057_23CR03A	500		0.155503	0.523148	0.0800211	45.3752	0.0317939	1.20273	0.120927	0.74242	149.632
	059_23CR03A	750		0.175787	0.0677116	0.00147248	0.11224	85.743	2386.79	26.5468	62.0309	1.81877	0.712779	0.591321		059_23CR03A	750		0.638501	0.0129339	786.325	7.95423			0.426204		059_23CR03A	750		0.000812006	1.49284e-05	0.00127174	1.28645e-05			0.0806215		059_23CR03A	750		0.175806	0.467194	0.0677116	41.4702	0.0359676	0.961537	0.112286	0.898089	138.226
	060_23CR03A	999		0.149658	0.0312964	0.00110351	0.107835	71.8673	2208.22	23.5652	61.6626	1.74738	1.48161	2.87047		060_23CR03A	999		0.720543	0.0137899	778.771	8.97455			0.530719		060_23CR03A	999		0.000925232	1.50609e-05	0.00128408	1.47977e-05			0.0839805		060_23CR03A	999		0.149667	0.540888	0.0312964	96.8667	0.0306199	0.935723	0.107856	0.788953	116.549
	061_23CR03A	999		0.152069	0.0763445	0.00167658	0.106033	64.0374	2083.76	24.2563	58.5142	1.71819	0.597218	0.453898		061_23CR03A	999		0.697273	0.0137847	719.668	8.42056			0.521979		061_23CR03A	999		0.000968881	1.63925e-05	0.00138953	1.62583e-05			0.0816483		061_23CR03A	999		0.152089	0.549313	0.0763445	37.9921	0.0316256	0.761754	0.106085	0.821114	109.439
	062_23CR03A	999		0.138497	0.0451432	0.000793132	0.104317	55.233	1923.57	21.1492	57.1873	1.69037	0.993642	1.3097		062_23CR03A	999		0.753207	0.0133555	697.363	8.20313			0.58167		062_23CR03A	999		0.00108008	1.56567e-05	0.00143397	1.68679e-05			0.0999715		062_23CR03A	999		0.138509	0.550655	0.0451432	65.9004	0.028163	1.00451	0.104347	0.694305	96.5826
	064_23CR03A	999		0.130565	0.0423589	0.00168517	0.0961021	46.8216	1825.98	27.4353	54.5687	1.55726	0.975566	1.6174		064_23CR03A	999		0.73605	0.0169655	657.169	7.17368			0.401867		064_23CR03A	999		0.00112003	2.37121e-05	0.00152168	1.66107e-05			0.0780897		064_23CR03A	999		0.130576	0.502679	0.0423589	82.8889	0.0274604	1.027	0.0961306	1.03642	85.8031
	065_23CR03A	999		0.131558	0.0526111	0.000371419	0.100401	40.4598	1614.49	23.0712	50.741	1.62692	0.820594	0.933099		065_23CR03A	999		0.763168	0.015036	606.104	5.44217			0.348236		065_23CR03A	999		0.00125914	2.34073e-05	0.00164988	1.48142e-05			0.113932		065_23CR03A	999		0.131572	0.392354	0.0526111	56.8479	0.0263859	0.930252	0.100436	0.903018	79.7378
	066_23CR03A	999		0.121534	0.0253935	0.00132374	0.0938629	36.3858	1573.2	24.3444	50.0692	1.52098	1.58942	3.66342		066_23CR03A	999		0.772319	0.0163023	597.948	7.97342			0.557768		066_23CR03A	999		0.00129162	2.27185e-05	0.00167239	2.23007e-05			0.088756		066_23CR03A	999		0.121541	0.626419	0.0253935	115.24	0.0253696	1.07031	0.09388	0.848942	72.671
	067_23CR03A	999		0.11305	0.0361815	0.000800417	0.0950986	32.3624	1439.54	26.6978	48.9488	1.541	1.1302	1.55725		067_23CR03A	999		0.841208	0.0207222	584.826	8.45286			0.526522		067_23CR03A	999		0.00143839	3.01994e-05	0.00170991	2.47144e-05			0.0706513		067_23CR03A	999		0.11306	0.68451	0.0361815	68.8848	0.023262	1.12688	0.095123	1.0235	66.1147
	069_23CR03A	999		0.117814	-0.0171818	0.00104991	0.0888372	30.6572	1453.52	26.9127	46.569	1.43954	-2.22328	7.87701		069_23CR03A	999		0.754048	0.017916	558.778	6.89442			0.438693		069_23CR03A	999		0.00134946	2.89285e-05	0.00178962	2.2081e-05			0.0893388		069_23CR03A	999		0.11781	0.567001	-0.0171818	177.145	0.0243336	1.24015	0.0888257	1.04381	65.8318
	070_23CR03A	999		0.118374	0.103204	0.000919546	0.0917232	26.9033	1296.44	25.5019	43.2216	1.4863	0.382164	0.209761		070_23CR03A	999		0.774862	0.0176594	525.834	6.79848			0.489936		070_23CR03A	999		0.00147359	2.93919e-05	0.00190174	2.45875e-05			0.0883939		070_23CR03A	999		0.118401	0.600582	0.103204	27.4269	0.0243438	1.1677	0.0917927	0.967344	62.245
	071_23CR03A	999		0.131961	0.0947306	0.00113215	0.0900817	23.3778	1186.17	26.5425	37.2399	1.4597	0.408898	0.270377		071_23CR03A	999		0.682638	0.0157271	475.716	5.67496			0.43681		071_23CR03A	999		0.00143497	2.98593e-05	0.00210209	2.50765e-05			0.0896641		071_23CR03A	999		0.131987	0.547697	0.0947306	33.0461	0.0270977	1.10628	0.0901455	1.01234	62.7762
	072_23CR03A	999		0.115615	0.0153976	0.000477405	0.0929782	21.5432	1090.12	21.6441	38.4279	1.50664	2.59655	9.91307		072_23CR03A	999		0.804204	0.0160193	484.895	4.87807			0.382443		072_23CR03A	999		0.00165851	3.07926e-05	0.0020623	2.07469e-05			0.131528		072_23CR03A	999		0.11562	0.437648	0.0153976	190.887	0.0233969	1.16507	0.0929886	0.894278	56.0614
	074_23CR03A	999		0.110241	0.0259082	0.000790363	0.0899739	19.7912	1048.04	27.9063	37.5511	1.45796	1.4933	3.6899		074_23CR03A	999		0.816159	0.021998	478.088	6.70064			0.451454		074_23CR03A	999		0.00170713	4.11776e-05	0.00209167	2.93158e-05			0.076591		074_23CR03A	999		0.110248	0.652871	0.0259082	123.543	0.0226603	1.4793	0.0899913	1.17843	52.7048
	075_23CR03A	999		0.119702	0.000938481	0.00143917	0.0862505	19.5088	1070.47	25.603	35.3119	1.39762	39.5188	1906.09		075_23CR03A	999		0.720542	0.0154391	461.538	5.88141			0.503096		075_23CR03A	999		0.00156118	2.90717e-05	0.00216667	2.761e-05			0.105428		075_23CR03A	999		0.119703	0.585996	0.000938481	2411.62	0.0250475	0.885228	0.0862511	0.896686	55.2472
	076_23CR03A	999		0.114993	0.0223996	0.000805458	0.0880886	16.7262	935.512	28.1757	32.7587	1.42741	1.69102	5.2427		076_23CR03A	999		0.766033	0.0199782	444.013	6.15354			0.456988		076_23CR03A	999		0.00172525	4.01612e-05	0.00225218	3.12128e-05			0.0833657		076_23CR03A	999		0.115	0.642516	0.0223996	155.012	0.0235485	1.11123	0.0881037	1.13417	51.0587
	077_23CR03A	999		0.0998669	-0.0197931	0.000566642	0.0894466	15.7172	880.047	25.8231	34.5178	1.44941	-1.94321	7.36058		077_23CR03A	999		0.895658	0.0218185	455.941	6.81903			0.530686		077_23CR03A	999		0.00196442	4.07546e-05	0.00219326	3.28023e-05			0.0977644		077_23CR03A	999		0.0998619	0.695207	-0.0197931	189.39	0.0204747	1.55044	0.0894332	0.999851	45.5335
	085_23CR03A	999		0.0952693	0.028605	0.000222985	0.0793713	13.4906	857.049	31.5027	32.1708	1.28615	1.19313	2.30769		085_23CR03A	999		0.833126	0.0174997	440.165	7.81548			0.598487		085_23CR03A	999		0.00189276	3.33283e-05	0.00227188	4.0339e-05			0.294444		085_23CR03A	999		0.0952769	0.746913	0.028605	96.7041	0.0191424	1.72032	0.0793906	0.73768	41.9343
	086_23CR03A	999		0.0876535	0.0239903	0.000531569	0.0822373	13.3798	827.538	33.2244	33.8304	1.33259	1.47402	4.09759		086_23CR03A	999		0.93821	0.0205656	451.204	9.93415			0.785755		086_23CR03A	999		0.00207934	2.99024e-05	0.00221629	4.8796e-05			0.333308		086_23CR03A	999		0.08766	0.973547	0.0239903	138.993	0.0180501	1.59913	0.0822535	0.502332	39.5497
	087_23CR03A	999		0.0847022	0.0777565	0.000174592	0.0831722	11.7755	739.023	31.5354	31.7706	1.34774	0.45995	0.331004		087_23CR03A	999		0.981937	0.0239101	437.583	8.4854			0.554533		087_23CR03A	999		0.002244	4.73516e-05	0.00228528	4.43151e-05			0.279066		087_23CR03A	999		0.0847228	0.808831	0.0777565	35.9711	0.0171482	1.41375	0.0832245	0.908924	37.0643
	088_23CR03A	999		0.0916911	-0.0115339	0.000455261	0.0807733	10.8431	707.23	35.4946	28.3714	1.30887	-3.01136	17.577		088_23CR03A	999		0.880929	0.0220096	416.817	8.52044			0.606037		088_23CR03A	999		0.00211347	4.34703e-05	0.00239913	4.90423e-05			0.257685		088_23CR03A	999		0.0916883	0.879631	-0.0115339	291.844	0.0187172	1.35228	0.0807656	0.886643	38.2185
	090_23CR03A	999		0.0775684	0.0062558	0.000166325	0.0782132	10.0857	683.968	33.1628	30.3379	1.26738	5.37608	41.7566		090_23CR03A	999		1.00831	0.0231661	428.584	9.07205			0.637013		090_23CR03A	999		0.00235266	4.44103e-05	0.00233327	4.93895e-05			0.34604		090_23CR03A	999		0.0775701	0.879993	0.0062558	388.355	0.0157351	1.9101	0.0782174	0.738006	33.2446
	091_23CR03A	999		0.0801046	0.0456565	0.000245558	0.0795516	9.47547	639.888	35.6585	28.3768	1.28907	0.749229	0.939127		091_23CR03A	999		0.993097	0.0247004	416.849	9.4147			0.661868		091_23CR03A	999		0.00238239	4.67531e-05	0.00239895	5.41813e-05			0.312027		091_23CR03A	999		0.0801168	0.963916	0.0456565	62.6679	0.0163086	2.02884	0.0795824	0.784848	33.3916
	092_23CR03A	999		0.0784285	0.0501593	0.000173338	0.0785696	9.15474	628.093	34.0629	28.1075	1.27316	0.673552	0.749043		092_23CR03A	999		1.0018	0.0207025	415.287	9.04503			0.735351		092_23CR03A	999		0.0024123	3.73305e-05	0.00240797	5.24461e-05			0.425455		092_23CR03A	999		0.0784418	0.909436	0.0501593	55.6018	0.0159086	1.5007	0.0786033	0.489303	32.5704
	093_23CR03A	999	4	0.081249	-0.0133171	0.000447457	0.0767182	8.77272	618.175	33.9423	26.5595	1.24316	-2.47718	9.19517		093_23CR03A	999	4	0.944236	0.0194907	406.533	8.14677			0.631157		093_23CR03A	999	4	0.00232265	4.05972e-05	0.00245982	4.92939e-05			0.401139		093_23CR03A	999	4	0.0812457	0.807891	-0.0133171	185.596	0.016692	1.95572	0.0767093	0.641975	33.0305
	095_23CR03A	999	4	0.0887729	0.0401217	0.000891962	0.075457	7.56653	552.442	36.3681	22.2084	1.22272	0.808702	1.26682		095_23CR03A	999	4	0.850001	0.0184117	383.795	7.32041			0.559619		095_23CR03A	999	4	0.00221473	4.26347e-05	0.00260556	4.96979e-05			0.361132		095_23CR03A	999	4	0.0887839	0.760125	0.0401217	78.3203	0.0185394	1.30702	0.075484	0.770549	34.0706
	096_23CR03A	999	4	0.0838242	0.0267825	0.000277586	0.0738281	7.30494	546.103	41.575	22.5939	1.19633	1.18533	2.3578		096_23CR03A	999	4	0.880749	0.0205024	385.706	9.01845			0.73663		096_23CR03A	999	4	0.00228347	3.86648e-05	0.00259265	6.06204e-05			0.368178		096_23CR03A	999	4	0.0838314	1.00105	0.0267825	99.4556	0.0169725	1.42259	0.0738461	0.592955	32.3316
	097_23CR03A	999	4	0.0758336	-0.0314221	0.00103997	0.0751179	6.94858	515.096	36.6626	23.4833	1.21723	-1.02796	1.69689		097_23CR03A	999	4	0.990563	0.020149	390.189	8.66269			0.709586		097_23CR03A	999	4	0.00253867	4.13858e-05	0.00256286	5.68987e-05			0.476476		097_23CR03A	999	4	0.0758257	0.895097	-0.0314221	82.5355	0.0162443	1.20017	0.0750968	0.482563	29.5895
			S	24.864	5.13824	0.344705	6.17123	23603.9																																S	24.8655	0.0490459	5.13824	5.22644	5.1063	0.0726846	6.17469	0.11043	31027.3
	Information on Analysis				Results		40(r)/39(k)	± 2s	Age	± 2s	MSWD	39Ar(k)	K/Ca	± 2s		Results			40(a)/36(a)	± 2s	40(r)/39(k)	± 2s	Age	± 2s	MSWD		Results			40(a)/36(a)	± 2s	40(r)/39(k)	± 2s	Age	± 2s	MSWD		Information on Analysis and Constants Used in Calculations									Results		40(a)/36(a)
									(Ma)			(%,n)											(Ma)											(Ma)
	Sample = 003_23CR03A				Age Plateau Error Mean		101.84	9.57134	559.866	45.3333	6.05246	4.87944	0.284687	1.07414		Normal Isochron Error Chron			331.473	179.041	65.6792	195.858	380.047	1023.39	8.47861		Inverse Isochron Error Chron			328.602	183.434	69.3676	82.2132	399.219	425.103	8.82987		Sample = 003_23CR03A				Age Equations = Min et al. (2000)					Age Plateau Error Mean
	Material = Quartz							0.0939838		0.0809717	0.000408169	4								0.540139		2.98204		2.69281	0.000207868						0.558224		1.18518		1.06484	0.000146297		Material = Quartz				Negative Intensities = Allowed
	Location = R3 Rursee				Full External Error					46.5289	2.63299	2σ Confidence Limit				Full External Error								1023.42			Full External Error								425.173			Location = R3 Rursee				Decay Constant 40K = 5.460 ± 0.053 E-10 1/a					Full External Error
	Analyst = Klaudia Kuiper				Analytical Error					45.3322	2.46017	Error Magnification				Analytical Error								1023.39			Analytical Error								425.103			Analyst = Klaudia Kuiper				Decay Constant 39Ar = 2.940 ± 0.016 E-07 1/h					Analytical Error
	Project = VU123																																					Project = VU123				Decay Constant 37Ar = 8.230 ± 0.012 E-04 1/h
	Mass Discrimination Law = LIN				Total Fusion Age		3824.83	9.34833	4886.83	4.30409		62	0.516447	0.0539957																								Mass Discrimination Law = LIN				Decay Constant 36Cl = 2.257 ± 0.015 E-06 1/a					Total Fusion Age
	Irradiation = VU123							0.00244411		0.000880752						Statistics			2σ Confidence Limit	3		Convergence	0.000187884				Statistics			2σ Confidence Limit	3		Convergence	6.72151e-06				Irradiation = VU123				Decay Activity 40K(EC,β⁺) = 3.310 ± 0.030 1/gs
	J = 0.00351130 ± 0.00000112				Full External Error					57.5331									Error Magnification	2.9118		Number of Iterations	8							Error Magnification	2.97151		Number of Iterations	7				J = 0.00351130 ± 0.00000112				Decay Activity 40K(β⁻) = 27.890 ± 0.150 1/gs					Full External Error
	DRA = 25.522 ± 0.079 Ma				Analytical Error					4.16371									Number of Data Points	4		Calculated Line	Weighted York-2							Number of Data Points	4		Calculated Line	Weighted York-2				DRA = 25.522 ± 0.079 Ma				Atmospheric Ratio 40/36(a) = 298.56 ± 0.31					Analytical Error
																														Spreading Factor	0.0241092							IGSN = Undefined				Atmospheric Ratio 38/36(a) = 0.1885 ± 0.0003
																																						Preferred Age = Undefined				Production Ratio 39/37(ca) = 0.000673 ± 0.000004					Normal Isochron Error Chron		331.473
																																						Classification = Undefined				Production Ratio 36/37(ca) = 0.000264 ± 0.000002
																																						Experiment Type = Undefined				Production Ratio 40/39(k) = 0.000860 ± 0.000070					Full External Error
																																						Extraction Method = Undefined				Production Ratio 38/39(k) = 0.012110 ± 0.000030					Analytical Error
																																						Heating = 180 sec				Production Ratio 36/38(cl) = 262.80 ± 1.71
																																						Isolation = 5.00 min				Scaling Ratio K/Ca = 0.430
																																						Instrument = HELIX				Abundance Ratio 40K/K = 1.1700 ± 0.0100 E-04
																																						Lithology = Undefined				Atomic Weight K = 39.0983 ± 0.0001 g					Inverse Isochron Error Chron		328.602
																																						Lat-Lon = Undefined - Undefined
																																						Feature = Undefined									Full External Error
																																															Analytical Error
[truncated: 150 more columns]

## Sheet: Rursee 4 BPV
	Incremental Crushing			36Ar(a) [fA]	37Ar(ca) [fA]	38Ar(cl) [fA]	39Ar(k) [fA]	40Ar(r) [fA]	Age	± 2s	40Ar(r)	39Ar(k)	K/Ca	± 2s		Normal Isochron			39(k)/36(a)	± 2s	40(a+r)/36(a)	± 2s			r.i.		Inverse Isochron			39(k)/40(a+r)	± 2s	36(a)/40(a+r)	± 2s			r.i.		Relative Abundances			36Ar [fA]	%1s	37Ar [fA]	%1s	38Ar [fA]	%1s	39Ar [fA]	%1s	40Ar [fA]
									(Ma)		(%)	(%)
	003_23CR04A	1		0.0622364	-0.053174	0.000754412	0.00232327	26.9503	6830.58	446.039	59.1903	0.00394309	-0.0187875	0.0361409		003_23CR04A	1		0.0373298	0.0093193	731.59	13.1891			0.060335		003_23CR04A	1		5.10255e-05	1.27161e-05	0.00136689	2.46422e-05			0.0118995		003_23CR04A	1		0.0622227	0.823834	-0.053174	95.3734	0.0125141	2.3118	0.00228749	12.5617	45.5316
	004_23CR04A	3		0.196392	0.0375911	0.00230003	0.00635361	70.3967	6748.64	193.186	54.5578	0.0107834	0.0726782	0.175511		004_23CR04A	3		0.0323517	0.00349569	657.01	5.95512			0.0653116		004_23CR04A	3		4.92407e-05	5.31016e-06	0.00152205	1.37958e-05			0.0186095		004_23CR04A	3		0.196403	0.399823	0.0375911	120.625	0.0393968	0.904019	0.00637891	5.34508	129.032
	005_23CR04A	5		0.973594	0.137385	0.00665613	0.014762	300.494	7840.92	104.992	50.8303	0.0250542	0.0462036	0.0311271		005_23CR04A	5		0.0151624	0.000874891	607.204	3.56698			0.0629677		005_23CR04A	5		2.49708e-05	1.43908e-06	0.00164689	9.67457e-06			0.0388875		005_23CR04A	5		0.973633	0.230984	0.137385	33.5618	0.190357	0.549254	0.0148545	2.85026	591.17
	013_23CR04A	7		0.753545	0.162774	0.00753888	0.0173851	245.215	7180.62	185.663	52.152	0.0295062	0.0459261	0.0203417		013_23CR04A	7		0.0230711	0.00238232	623.975	4.33698			0.0490586		013_23CR04A	7		3.69743e-05	3.81402e-06	0.00160263	1.11391e-05			0.0182715		013_23CR04A	7		0.753591	0.29667	0.162774	21.5379	0.149793	0.335956	0.0174946	5.12043	470.194
	014_23CR04A	9		0.467684	0.15868	0.00389643	0.0166293	175.501	6661.89	152.519	55.6911	0.0282234	0.0450628	0.0162948		014_23CR04A	9		0.0355566	0.00303744	673.815	5.60824			0.0784611		014_23CR04A	9		5.27691e-05	4.49474e-06	0.00148409	1.23522e-05			0.0190255		014_23CR04A	9		0.467728	0.373413	0.15868	17.5723	0.0922562	0.561142	0.0167361	4.22628	315.132
	015_23CR04A	11		0.659261	0.178151	0.00363442	0.0238291	243.139	6601.76	103.794	55.2629	0.0404431	0.0575159	0.0196855		015_23CR04A	11		0.0361452	0.00209731	667.366	4.90004			0.0963105		015_23CR04A	11		5.41609e-05	3.1295e-06	0.00149843	1.1002e-05			0.0303556		015_23CR04A	11		0.65931	0.320255	0.178151	16.8684	0.128194	0.39304	0.023949	2.86781	439.968
	016_23CR04A	13		0.602442	0.149852	0.00528352	0.0306915	224.602	6012.86	84.1062	55.5303	0.0520901	0.0880691	0.0274854		016_23CR04A	13		0.0509452	0.00241221	671.379	4.05067			0.0814287		016_23CR04A	13		7.58815e-05	3.58479e-06	0.00148947	8.98653e-06			0.0460988		016_23CR04A	13		0.602484	0.241135	0.149852	15.4257	0.119215	0.465365	0.0307924	2.34688	404.467
	018_23CR04A	17		1.13637	0.237923	0.00987586	0.0420658	436.572	6632.02	74.3604	56.2703	0.0713947	0.0760258	0.019932		018_23CR04A	17		0.0370176	0.00153	682.74	4.07967			0.0927008		018_23CR04A	17		5.42191e-05	2.23434e-06	0.00146469	8.75215e-06			0.0520263		018_23CR04A	17		1.13644	0.239227	0.237923	12.947	0.224592	0.386557	0.0422259	2.04431	775.848
	019_23CR04A	21		1.02385	0.24793	0.00738628	0.0466415	413.003	6349.84	66.7841	57.4665	0.0791606	0.0808933	0.0195481		019_23CR04A	21		0.0455548	0.00169647	701.941	4.07068			0.0967856		019_23CR04A	21		6.48984e-05	2.4097e-06	0.00142462	8.26164e-06			0.0591127		019_23CR04A	21		1.02392	0.228577	0.24793	11.9405	0.200948	0.438942	0.0468084	1.84084	718.685
	020_23CR04A	25		0.698543	0.102246	0.00956238	0.0477144	303.034	5763.86	55.6915	59.2337	0.0809815	0.200665	0.137493		020_23CR04A	25		0.0683056	0.00214103	732.369	4.22483			0.112622		020_23CR04A	25		9.32666e-05	2.91233e-06	0.00136543	7.87679e-06			0.07169		020_23CR04A	25		0.698574	0.225621	0.102246	34.2241	0.141815	0.328433	0.0477832	1.5479	511.591
	021_23CR04A	30		0.714327	0.183439	0.00695143	0.0611357	313.134	5388.94	56.1707	59.4855	0.10376	0.143308	0.0479358		021_23CR04A	30		0.0855851	0.00273495	736.922	4.18314			0.10636		021_23CR04A	30		0.000116139	3.69973e-06	0.001357	7.70299e-06			0.0714987		021_23CR04A	30		0.714378	0.219603	0.183439	16.6497	0.142342	0.279358	0.0612592	1.57908	526.403
	023_23CR04A	35		0.729562	0.106348	0.00714785	0.074285	323.357	5108.11	49.8936	59.7509	0.126077	0.300357	0.193697		023_23CR04A	35		0.101821	0.00291492	741.781	4.61743			0.145231		023_23CR04A	35		0.000137266	3.8983e-06	0.00134811	8.39169e-06			0.0727882		023_23CR04A	35		0.729593	0.25435	0.106348	32.2137	0.14557	0.319608	0.0743566	1.40691	541.175
	024_23CR04A	40		0.77919	0.0871826	0.00678522	0.0787219	345.274	5121.12	39.6071	59.7454	0.133608	0.38827	0.293412		024_23CR04A	40		0.10103	0.00225729	741.679	4.85784			0.184407		024_23CR04A	40		0.000136219	3.00954e-06	0.00134829	8.83103e-06			0.109971		024_23CR04A	40		0.779216	0.259729	0.0871826	37.7688	0.154616	0.476805	0.0787806	1.08534	577.909
	025_23CR04A	50		0.881375	0.158902	0.00686956	0.107589	395.625	4819.86	30.3715	60.0552	0.182601	0.291142	0.133334		025_23CR04A	50		0.122069	0.00208254	747.432	4.04809			0.17771		025_23CR04A	50		0.000163318	2.76942e-06	0.00133791	7.24614e-06			0.140602		025_23CR04A	50		0.88142	0.202595	0.158902	22.8835	0.174312	0.433519	0.107696	0.827469	658.768
	026_23CR04A	60		0.743263	0.140277	0.0060456	0.124504	361.236	4420.98	34.6287	61.9462	0.21131	0.38165	0.237353		026_23CR04A	60		0.16751	0.00342818	784.574	5.48857			0.251797		026_23CR04A	60		0.000213505	4.24696e-06	0.00127458	8.91645e-06			0.0926251		026_23CR04A	60		0.743303	0.300186	0.140277	31.0802	0.147659	0.367937	0.124599	0.977223	583.145
	028_23CR04A	70		0.922551	0.168665	0.00956281	0.143057	459.34	4590.67	23.0388	62.5142	0.242798	0.364714	0.142387		028_23CR04A	70		0.155067	0.00202244	796.462	4.99658			0.323167		028_23CR04A	70		0.000194694	2.43622e-06	0.00125555	7.87667e-06			0.164515		028_23CR04A	70		0.922599	0.257093	0.168665	19.5111	0.185196	0.409537	0.14317	0.598622	734.777
	029_23CR04A	80		0.738616	0.123828	0.00548322	0.174377	383.793	3966.55	22.3382	63.5089	0.295956	0.605538	0.314745		029_23CR04A	80		0.236087	0.00312595	818.172	5.2274			0.330283		029_23CR04A	80		0.000288554	3.65286e-06	0.00122224	7.80903e-06			0.159248		029_23CR04A	80		0.738651	0.26428	0.123828	25.9818	0.146824	0.497641	0.174461	0.606574	604.315
	030_23CR04A	90		0.683277	0.149359	0.0089745	0.190175	362.504	3735.5	21.0056	63.9898	0.322767	0.547507	0.23385		030_23CR04A	90		0.278327	0.00360712	829.098	6.12358			0.42978		030_23CR04A	90		0.000335699	3.97537e-06	0.00120613	8.90827e-06			0.153342		030_23CR04A	90		0.68332	0.320675	0.149359	21.3484	0.140075	0.372291	0.190275	0.562668	566.503
	031_23CR04A	100		0.825525	0.175423	0.00615797	0.221231	431.192	3770.98	18.6798	63.6294	0.375477	0.542285	0.192283		031_23CR04A	100		0.267989	0.00299562	820.884	5.48546			0.425328		031_23CR04A	100		0.000326463	3.36216e-06	0.0012182	8.14046e-06			0.187207		031_23CR04A	100		0.825574	0.281808	0.175423	17.7224	0.164448	0.322222	0.221349	0.482299	677.66
	033_23CR04A	120		0.866137	0.157721	0.00572778	0.280629	476.323	3552.15	15.2482	64.8132	0.476287	0.765088	0.308536		033_23CR04A	120		0.324	0.00281833	848.499	4.72062			0.374948		033_23CR04A	120		0.000381851	3.20223e-06	0.00117855	6.55687e-06			0.274503		033_23CR04A	120		0.866181	0.212973	0.157721	20.1599	0.172393	0.296913	0.280735	0.378986	734.917
	034_23CR04A	140		0.715699	0.126898	0.00741389	0.333778	420.75	3096.5	14.1614	66.3194	0.566493	1.13102	0.535367		034_23CR04A	140		0.466367	0.00393356	886.447	6.13743			0.518435		034_23CR04A	140		0.000526108	4.02487e-06	0.0011281	7.81053e-06			0.333438		034_23CR04A	140		0.715735	0.275098	0.126898	23.6652	0.146365	0.369618	0.333863	0.319491	634.429
	035_23CR04A	180		0.90864	0.179746	0.00974203	0.419201	515.824	3060.52	12.043	65.5341	0.711473	1.00284	0.328926		035_23CR04A	180		0.46135	0.00327329	866.248	5.30311			0.551957		035_23CR04A	180		0.000532584	3.36283e-06	0.0011544	7.06718e-06			0.349337		035_23CR04A	180		0.908692	0.244803	0.179746	16.3977	0.186097	0.344976	0.419322	0.256617	787.108
	036_23CR04A	230		0.936876	0.17686	0.0128719	0.535723	546.092	2785.84	11.4217	66.1283	0.909236	1.30251	0.431694		036_23CR04A	230		0.571818	0.0039732	881.446	5.09991			0.511942		036_23CR04A	230		0.000648728	4.13323e-06	0.0011345	6.56404e-06			0.349803		036_23CR04A	230		0.936929	0.226818	0.17686	16.5696	0.195961	0.348909	0.535842	0.263063	825.806
	038_23CR04A	290		0.814879	0.119844	0.00552149	0.698226	515.082	2340.44	9.30582	67.9194	1.18504	2.50523	1.57543		038_23CR04A	290		0.856847	0.00579492	930.657	6.20172			0.703219		038_23CR04A	290		0.00092069	4.76277e-06	0.00107451	7.16033e-06			0.368812		038_23CR04A	290		0.814913	0.281467	0.119844	31.4423	0.167582	0.460852	0.698307	0.187337	758.373
	039_23CR04A	370		0.823676	0.198142	0.0109332	0.841745	513.119	2095.37	8.65303	67.6014	1.42862	1.82672	0.594176		039_23CR04A	370		1.02194	0.00685014	921.522	6.31519			0.740226		039_23CR04A	370		0.00110897	5.42018e-06	0.00108516	7.43661e-06			0.386937		039_23CR04A	370		0.823734	0.291539	0.198142	16.2626	0.17639	0.391264	0.841879	0.165243	759.037
	040_23CR04A	470		0.762915	0.17408	0.0112166	1.04353	510.92	1831.67	7.1186	69.1651	1.77109	2.57765	0.796515		040_23CR04A	470		1.36782	0.00687864	968.255	5.45103			0.666683		040_23CR04A	470		0.00141266	6.19553e-06	0.00103279	5.81432e-06			0.519199		040_23CR04A	470		0.762966	0.217209	0.17408	15.4499	0.167663	0.40331	1.04365	0.126615	738.697
	041_23CR04A	590		0.695421	0.199001	0.00652183	1.21186	480.653	1597.49	7.64055	69.834	2.05678	2.61856	0.936717		041_23CR04A	590		1.74262	0.0112465	989.728	5.78			0.564984		041_23CR04A	590		0.00176071	1.01403e-05	0.00101038	5.9006e-06			0.380903		041_23CR04A	590		0.695477	0.230707	0.199001	17.8847	0.152284	0.355049	1.21199	0.225561	688.279
	049_23CR04A	750		0.586147	0.193101	0.00456299	1.40028	417.005	1310.61	6.21967	70.4393	2.37658	3.11817	1.29298		049_23CR04A	750		2.38896	0.0149563	1009.99	6.32138			0.671801		049_23CR04A	750		0.00236533	1.19958e-05	0.000990105	6.1969e-06			0.404802		049_23CR04A	750		0.5862	0.256504	0.193101	20.7323	0.132009	0.512152	1.40041	0.179355	592.006
	050_23CR04A	200		0.280246	0.0774812	0.00234891	0.750236	197.932	1200.6	7.51709	70.2876	1.27331	4.16361	3.35286		050_23CR04A	200		2.67706	0.025751	1004.84	8.47065			0.711879		050_23CR04A	200		0.00266417	1.84849e-05	0.000995184	8.38926e-06			0.228037		050_23CR04A	200		0.280268	0.379843	0.0774812	40.2628	0.0642607	0.513484	0.750289	0.294937	281.603
	051_23CR04A	350		0.451351	0.0978754	0.00555928	1.34723	289.73	1030.14	5.12033	68.2543	2.28654	5.91885	4.75382		051_23CR04A	350		2.98489	0.0173356	940.478	5.85325			0.713438		051_23CR04A	350		0.0031738	1.45057e-05	0.00106329	6.61758e-06			0.455138		051_23CR04A	350		0.451379	0.253883	0.0978754	40.158	0.106954	0.610399	1.3473	0.140893	424.487
	052_23CR04A	500		0.547173	0.202923	0.0043001	1.79324	326.238	904.576	4.77361	66.6331	3.04351	3.79993	1.54926		052_23CR04A	500		3.27728	0.0183944	894.784	5.33059			0.675451		052_23CR04A	500		0.00366265	1.711e-05	0.00111759	6.65792e-06			0.463731		052_23CR04A	500		0.547228	0.237586	0.202923	20.3848	0.129158	0.51982	1.79338	0.149289	489.603
	054_23CR04A	700		0.688688	0.27422	0.0051619	2.3528	335.397	743.193	4.30513	61.9942	3.9932	3.68939	0.823329		054_23CR04A	700		3.41635	0.0192776	785.568	4.98734			0.767169		054_23CR04A	700		0.00434888	1.80258e-05	0.00127296	8.08167e-06			0.487288		054_23CR04A	700		0.688763	0.262091	0.27422	11.1576	0.163472	0.467943	2.35298	0.10436	541.014
	055_23CR04A	900		0.550956	0.16856	0.00510102	2.73583	309.769	613.016	3.50122	65.3157	4.64329	6.97914	2.42121		055_23CR04A	900		4.96561	0.0285569	860.8	5.42583			0.740994		055_23CR04A	900		0.00576859	2.51994e-05	0.00116171	7.32254e-06			0.467412		055_23CR04A	900		0.551002	0.259111	0.16856	17.3456	0.142087	0.418091	2.73594	0.124618	474.265
	056_23CR04A	250		0.0659548	0.0503111	0.000802579	0.372378	38.132	562.52	6.5261	65.9452	0.632005	3.18265	4.2878		056_23CR04A	250		5.64596	0.113386	876.713	17.4773			0.93619		056_23CR04A	250		0.00643992	4.60416e-05	0.00114062	2.27384e-05			0.158585		056_23CR04A	250		0.0659685	0.967697	0.0503111	67.3616	0.0177446	1.94345	0.372412	0.266889	57.8238
	057_23CR04A	500		0.128109	0.0808683	0.000160888	0.809488	74.2879	511.545	3.78684	66.012	1.37387	4.30428	3.40065		057_23CR04A	500		6.31872	0.0650312	878.438	9.30847			0.885994		057_23CR04A	500		0.00719313	3.59365e-05	0.00113838	1.2063e-05			0.29586		057_23CR04A	500		0.128131	0.491364	0.0808683	39.5029	0.0341124	1.19501	0.809542	0.152419	112.537
	059_23CR04A	750		0.17408	0.0698261	0.00193268	1.19643	95.1118	450.855	3.52932	64.664	2.0306	7.36782	8.3322		059_23CR04A	750		6.87288	0.0764646	844.927	9.76008			0.921239		059_23CR04A	750		0.00813428	3.67624e-05	0.00118353	1.36715e-05			0.288109		059_23CR04A	750		0.1741	0.543951	0.0698261	56.5444	0.0492356	0.963885	1.19648	0.115996	147.086
	060_23CR04A	999		0.248817	0.104565	0.001494	1.62716	114.851	405.495	3.3648	60.723	2.76165	6.69134	4.37363		060_23CR04A	999		6.53961	0.0616751	760.149	7.47726			0.875737		060_23CR04A	999		0.00860307	4.14556e-05	0.00131553	1.29403e-05			0.327367		060_23CR04A	999		0.248845	0.450603	0.104565	32.681	0.0681009	0.68842	1.62723	0.138757	189.139
	061_23CR04A	999		0.233897	0.126736	0.0016861	1.60396	100.442	363.998	3.01511	58.9879	2.72227	5.44206	2.83202		061_23CR04A	999		6.85756	0.0584324	727.988	6.44643			0.846719		061_23CR04A	999		0.00941988	4.5414e-05	0.00137365	1.21638e-05			0.340245		061_23CR04A	999		0.233931	0.399573	0.126736	26.0193	0.0651997	0.496102	1.60405	0.147611	170.276
	062_23CR04A	999		0.197426	0.102861	0.0025342	1.57847	89.793	333.515	3.30704	60.3699	2.679	6.59863	4.85741		062_23CR04A	999		7.99525	0.0788657	753.378	7.68047			0.8005		062_23CR04A	999		0.0106125	6.73151e-05	0.00132736	1.3532e-05			0.362374		062_23CR04A	999		0.197455	0.448514	0.102861	36.8057	0.0588643	0.768474	1.57854	0.204927	148.738
	064_23CR04A	999		0.202431	0.0754025	0.00161592	1.44624	73.1996	299.584	2.9359	54.7743	2.45458	8.24752	7.76466		064_23CR04A	999		7.14437	0.0598248	660.163	5.90533			0.829624		064_23CR04A	999		0.0108221	5.50235e-05	0.00151478	1.35501e-05			0.393015		064_23CR04A	999		0.202452	0.394087	0.0754025	47.0725	0.0572881	0.55848	1.44629	0.141194	133.639
	065_23CR04A	999		0.170634	0.100065	0.00231214	1.44167	68.7656	283.598	3.21815	57.4429	2.44682	6.19518	4.20217		065_23CR04A	999		8.4489	0.0883685	701.561	7.34938			0.771459		065_23CR04A	999		0.012043	8.52265e-05	0.00142539	1.49321e-05			0.340114		065_23CR04A	999		0.170661	0.459589	0.100065	33.9139	0.0519353	0.648583	1.44174	0.249319	119.711
	066_23CR04A	999		0.238336	0.0713273	0.000568638	1.39014	62.3451	267.831	2.85884	46.6992	2.35936	8.3805	8.43752		066_23CR04A	999		5.83269	0.0394251	560.146	4.19132			0.814376		066_23CR04A	999		0.0104128	4.5745e-05	0.00178525	1.33582e-05			0.450229		066_23CR04A	999		0.238355	0.320842	0.0713273	50.34	0.0623294	0.812901	1.39019	0.106046	133.504
	067_23CR04A	999		0.148011	0.0869541	0.00139216	1.35089	56.7852	252.137	2.72774	56.2361	2.29274	6.68032	6.49191		067_23CR04A	999		9.12695	0.0988539	682.216	7.2271			0.834852		067_23CR04A	999		0.0133784	8.24202e-05	0.00146581	1.55282e-05			0.251806		067_23CR04A	999		0.148034	0.489225	0.0869541	48.5892	0.0456514	1.30024	1.35095	0.231931	100.976
	069_23CR04A	999		0.100922	0.0133114	0	1.27412	49.996	236.404	2.39108	62.395	2.16245	41.158	173.159		069_23CR04A	999		12.6248	0.166535	793.954	10.8372			0.932		069_23CR04A	999		0.0159012	7.90238e-05	0.00125952	1.7192e-05			0.272773		069_23CR04A	999		0.100925	0.647645	0.0133114	210.359	0.0342907	0.772881	1.27413	0.124432	80.1283
	070_23CR04A	999		0.13598	0.0539863	0.000394027	1.25228	48.101	231.712	2.59313	54.2287	2.12539	9.97442	13.7385		070_23CR04A	999		9.20931	0.0964261	652.295	7.1159			0.891211		070_23CR04A	999		0.0141183	7.06545e-05	0.00153305	1.6724e-05			0.315236		070_23CR04A	999		0.135995	0.504367	0.0539863	68.8684	0.0411914	0.773714	1.25232	0.139934	88.7003
	071_23CR04A	999		0.126912	0.0286488	0.000595151	1.22845	45.6304	224.525	2.55481	54.6327	2.08494	18.4383	39.049		071_23CR04A	999		9.67958	0.105682	658.105	7.56815			0.911746		071_23CR04A	999		0.0147083	6.97678e-05	0.00151951	1.74743e-05			0.325812		071_23CR04A	999		0.126919	0.534895	0.0286488	105.891	0.0393945	0.876163	1.22847	0.108699	83.5222
	072_23CR04A	999		0.107592	0.0374655	0.000251788	1.20973	42.416	212.642	2.1655	56.9039	2.05317	13.8843	26.0104		072_23CR04A	999		11.2437	0.104168	692.79	6.77644			0.839633		072_23CR04A	999		0.0162295	8.78976e-05	0.00144344	1.41188e-05			0.369747		072_23CR04A	999		0.107602	0.436017	0.0374655	93.6682	0.0351827	1.1351	1.20975	0.156067	74.5397
	074_23CR04A	999		0.0995226	-0.013242	0.00113832	1.15244	39.705	209.148	2.35054	57.1958	1.95594	-37.4226	152.266		074_23CR04A	999		11.5797	0.133657	697.515	8.31913			0.89126		074_23CR04A	999		0.0166014	9.10611e-05	0.00143366	1.7099e-05			0.298914		074_23CR04A	999		0.0995196	0.553807	-0.013242	203.441	0.0338544	0.855092	1.15243	0.162258	69.4195
	075_23CR04A	999		0.104045	0.0569541	0	1.12937	38.2774	205.932	2.45436	55.2007	1.91678	8.52666	8.04783		075_23CR04A	999		10.8546	0.121989	666.451	7.62282			0.858202		075_23CR04A	999		0.0162871	9.83919e-05	0.00150049	1.71624e-05			0.296804		075_23CR04A	999		0.104061	0.525041	0.0569541	47.1918	0.0331493	0.955458	1.12941	0.199901	69.3422
	076_23CR04A	999		0.140126	0.0334199	0	1.11341	36.4781	199.426	3.17359	46.5787	1.88969	14.3257	26.1436		076_23CR04A	999		7.94576	0.0968643	558.884	6.9092			0.891054		076_23CR04A	999		0.0142172	8.15073e-05	0.00178928	2.212e-05			0.261633		076_23CR04A	999		0.140135	0.57935	0.0334199	91.2468	0.0398956	0.842617	1.11343	0.189225	78.315
	077_23CR04A	999		0.107783	0.0297173	0.00114816	1.05818	32.8988	189.754	3.0472	50.5517	1.79596	15.3115	35.5089		077_23CR04A	999		9.81765	0.141068	603.791	8.88142			0.922594		077_23CR04A	999		0.01626	9.31752e-05	0.0016562	2.43618e-05			0.253529		077_23CR04A	999		0.107792	0.698102	0.0297173	115.955	0.0342799	1.13195	1.0582	0.169296	65.0795
	085_23CR04A	999		0.0873159	0.0533722	0.000415792	1.0118	30.4495	183.973	2.65561	53.8744	1.71724	8.15167	11.6124		085_23CR04A	999		11.5878	0.163315	647.288	9.45157			0.924357		085_23CR04A	999		0.017902	0.000100302	0.00154491	2.25584e-05			0.280963		085_23CR04A	999		0.0873302	0.689404	0.0533722	71.2273	0.0291277	1.10236	1.01183	0.144936	56.5194
	086_23CR04A	999		0.104561	0.0606404	0	0.997309	29.0275	178.215	2.84603	48.1816	1.69265	7.0719	11.7343		086_23CR04A	999		9.53805	0.118772	576.173	7.51832			0.908282		086_23CR04A	999		0.0165541	9.0915e-05	0.00173559	2.26472e-05			0.316531		086_23CR04A	999		0.104577	0.607197	0.0606404	82.9642	0.0317661	1.01511	0.997349	0.136684	60.2462
	087_23CR04A	999		0.086687	0.0178069	0.000106432	0.982505	28.1003	175.265	2.60029	52.0545	1.66752	23.7255	98.1336		087_23CR04A	999		11.3339	0.150745	622.718	8.62234			0.91305		087_23CR04A	999		0.0182008	0.000103478	0.00160586	2.22353e-05			0.299439		087_23CR04A	999		0.0866918	0.648226	0.0178069	206.81	0.0283451	1.0953	0.982517	0.14789	53.9824
	088_23CR04A	999		0.0962014	0.0535693	0	0.968253	27.178	172.156	3.16305	48.6183	1.64333	7.77215	10.6679		088_23CR04A	999		10.0649	0.15617	581.071	9.32864			0.942062		088_23CR04A	999		0.0173212	9.35256e-05	0.00172096	2.76286e-05			0.266099		088_23CR04A	999		0.0962156	0.76577	0.0535693	68.6291	0.0297628	0.854057	0.968289	0.123337	55.9007
	090_23CR04A	999		0.0820509	0.0154864	0.00104133	0.923374	24.9807	166.202	2.61072	50.4879	1.56716	25.6387	136.223		090_23CR04A	999		11.2537	0.146065	603.014	7.98456			0.867242		090_23CR04A	999		0.0186624	0.000126161	0.00165834	2.19582e-05			0.293615		090_23CR04A	999		0.0820555	0.610241	0.0154864	265.66	0.02769	0.966648	0.923384	0.220306	49.4786
	091_23CR04A	999		0.172168	0.0524681	0.00148787	0.948463	25.9199	167.814	4.02743	33.5214	1.60974	7.77309	10.6894		091_23CR04A	999		5.50892	0.0604341	449.11	5.1457			0.899795		091_23CR04A	999		0.0122663	6.18536e-05	0.00222663	2.55117e-05			0.314646		091_23CR04A	999		0.172183	0.531662	0.0524681	68.759	0.0454275	0.777851	0.948498	0.134586	77.3233
	092_23CR04A	999		0.186675	0.0372659	0.000172916	0.90813	24.1267	163.344	3.85539	30.2107	1.54129	10.4786	20.0632		092_23CR04A	999		4.86475	0.0453461	427.804	4.00433			0.798491		092_23CR04A	999		0.0113715	6.74326e-05	0.00233752	2.18797e-05			0.323304		092_23CR04A	999		0.186685	0.417285	0.0372659	95.7335	0.0463587	0.852814	0.908155	0.207459	79.8612
	093_23CR04A	999		0.124568	0.0430257	0.00164914	0.865874	21.8693	155.62	3.07441	37.0284	1.46957	8.65357	16.6382		093_23CR04A	999		6.95104	0.0657251	474.122	4.8828			0.857049		093_23CR04A	999		0.0146609	7.83383e-05	0.00210916	2.17215e-05			0.410761		093_23CR04A	999		0.12458	0.456647	0.0430257	96.1349	0.0356159	1.01932	0.865903	0.121892	59.061
	095_23CR04A	999		0.100541	0.0445131	0.000457868	0.83608	20.6204	152.109	2.93882	40.7208	1.41901	8.0766	14.651		095_23CR04A	999		8.31583	0.0915197	503.655	5.86426			0.861911		095_23CR04A	999		0.016511	9.87858e-05	0.00198549	2.31178e-05			0.360631		095_23CR04A	999		0.100553	0.525298	0.0445131	90.7004	0.0295347	1.36589	0.83611	0.163319	50.6386
	096_23CR04A	999		0.190503	0.0533599	0.000990619	0.855116	21.7628	156.761	4.8293	27.674	1.45131	6.89093	9.82212		096_23CR04A	999		4.48873	0.0519966	412.799	4.6236			0.819606		096_23CR04A	999		0.0108739	7.45139e-05	0.00242249	2.71334e-05			0.249022		096_23CR04A	999		0.190518	0.515542	0.0533599	71.2679	0.0472559	0.824541	0.855152	0.263811	78.6401
	097_23CR04A	999		0.139536	0.0481057	0.00124186	0.816117	19.943	150.767	4.02416	32.3731	1.38512	7.29498	13.3269		097_23CR04A	999		5.84879	0.067505	441.484	5.32226			0.890701		097_23CR04A	999		0.013248	7.33797e-05	0.00226509	2.73065e-05			0.320494		097_23CR04A	999		0.139549	0.556509	0.0481057	91.3427	0.0374276	0.838657	0.816149	0.152257	61.6035
	098_23CR04A	999		0.195101	0.0537586	0.000395382	0.823139	20.3366	152.363	4.66141	25.8779	1.39704	6.58406	9.6078		098_23CR04A	999		4.21903	0.0413778	402.796	4.07438			0.838519		098_23CR04A	999		0.0104744	5.93758e-05	0.00248265	2.51126e-05			0.333681		098_23CR04A	999		0.195116	0.455964	0.0537586	72.9624	0.0471402	0.72907	0.823175	0.180246	78.5868
	100_23CR04A	999		0.805848	0.232232	0.00518178	0.842197	28.0668	202.67	10.6766	10.4469	1.42939	1.55941	0.58294		100_23CR04A	999		1.04511	0.00673941	333.389	1.95131			0.555617		100_23CR04A	999		0.0031348	1.82518e-05	0.0029995	1.7556e-05			0.389886		100_23CR04A	999		0.805912	0.228946	0.232232	18.6896	0.167283	0.419111	0.842353	0.226939	268.662
	101_23CR04A	999		0.0992408	-0.0128309	0.000539977	0.761546	18.0771	146.622	3.9334	37.8918	1.29251	-25.5217	140.553		101_23CR04A	999		7.67372	0.114944	480.713	7.41869			0.914218		101_23CR04A	999		0.0159632	0.00010079	0.00208024	3.21037e-05			0.27537		101_23CR04A	999		0.0992377	0.72683	-0.0128309	275.36	0.0284692	0.904185	0.761537	0.180483	47.707
	102_23CR04A	999		0.277692	0.103621	0.00270584	0.764205	19.7125	158.794	5.15396	19.2091	1.29702	3.17125	2.44343		102_23CR04A	999		2.75199	0.0177133	369.547	2.6586			0.77241		102_23CR04A	999		0.00744693	3.46515e-05	0.00270602	1.94676e-05			0.477648		102_23CR04A	999		0.27772	0.298973	0.103621	38.5245	0.0643053	0.646188	0.764275	0.118913	102.621
	103_23CR04A	999		0.128553	0.0487105	0.00124256	0.735415	16.7369	140.801	3.8849	30.3653	1.24816	6.49201	12.5488		103_23CR04A	999		5.7207	0.0602546	428.754	4.80585			0.867439		103_23CR04A	999		0.0133426	7.51907e-05	0.00233234	2.61429e-05			0.367744		103_23CR04A	999		0.128567	0.505844	0.0487105	96.6482	0.0343808	0.968602	0.735448	0.145947	55.1184
	105_23CR04A	999		1.19015	0.252829	0.00830967	0.792476	27.6473	211.638	16.9276	7.21901	1.345	1.34781	0.43497		105_23CR04A	999		0.665863	0.00403541	321.79	1.95514			0.648358		105_23CR04A	999		0.00206925	1.05301e-05	0.00310762	1.88814e-05			0.421805		105_23CR04A	999		1.19022	0.244288	0.252829	16.1352	0.242249	0.320564	0.792646	0.179196	382.979
	106_23CR04A	999		0.396094	0.0709267	0.00340503	0.737986	21.4543	178.013	7.34487	15.356	1.25252	4.47411	4.89931		106_23CR04A	999		1.86316	0.0140171	352.725	2.5175			0.677065		106_23CR04A	999		0.00528219	3.11736e-05	0.00283507	2.02347e-05			0.346266		106_23CR04A	999		0.396114	0.301451	0.0709267	54.7513	0.0870058	0.614526	0.738034	0.224925	139.713
	107_23CR04A	999		0.107853	0.0359065	0.000916195	0.663335	14.0924	131.766	3.58552	30.4414	1.12582	7.94378	17.9168		107_23CR04A	999		6.15036	0.0625082	429.223	4.59845			0.795494		107_23CR04A	999		0.0143291	9.59487e-05	0.00232979	2.49601e-05			0.392552		107_23CR04A	999		0.107863	0.465193	0.0359065	112.772	0.0292795	1.07593	0.663359	0.204137	46.2935
	108_23CR04A	999		0.182342	0.0320766	0.00296753	0.682209	16.3717	148.169	5.61694	23.1199	1.15785	9.14528	22.7384		108_23CR04A	999		3.74137	0.0395914	388.346	4.29528			0.880013		108_23CR04A	999		0.00963411	5.12658e-05	0.00257503	2.84809e-05			0.32851		108_23CR04A	999		0.182352	0.507381	0.0320766	124.318	0.0456006	0.747961	0.68223	0.149788	70.8124
	110_23CR04A	999	4	0.0742525	-0.00737203	0.00026264	0.653015	13.2594	126.133	3.55819	37.4255	1.10831	-38.0895	468.595		110_23CR04A	999	4	8.79452	0.129453	477.132	7.33042			0.87849		110_23CR04A	999	4	0.018432	0.000137158	0.00209586	3.21997e-05			0.326871		110_23CR04A	999	4	0.0742507	0.704581	-0.00737203	615.124	0.0221673	1.0481	0.65301	0.212103	35.4288
	111_23CR04A	999	4	0.16297	0.0116546	0.000299658	0.663432	14.4714	135.163	4.79439	22.9239	1.12599	24.4776	164.355		111_23CR04A	999	4	4.07089	0.0387382	387.358	3.87603			0.831493		111_23CR04A	999	4	0.0105094	5.97564e-05	0.00258159	2.58322e-05			0.368259		111_23CR04A	999	4	0.162973	0.444845	0.0116546	335.726	0.0390536	0.797825	0.66344	0.168609	63.1283
	112_23CR04A	999	4	0.147931	0.0923975	0.000516293	0.645939	13.9066	133.468	4.47803	23.9466	1.0963	3.00607	2.59976		112_23CR04A	999	4	4.36649	0.0415046	392.568	3.88489			0.803782		112_23CR04A	999	4	0.0111229	6.77194e-05	0.00254733	2.52087e-05			0.370539		112_23CR04A	999	4	0.147956	0.434633	0.0923975	43.2414	0.0362236	0.751717	0.646001	0.191914	58.0735
	113_23CR04A	999	4	0.0956544	0.0741732	0.000320858	0.63961	12.8543	124.885	4.67531	31.039	1.08555	3.70797	4.1678		113_23CR04A	999	4	6.68667	0.106427	432.943	6.98989			0.894036		113_23CR04A	999	4	0.0154447	0.000114031	0.00230977	3.72914e-05			0.259417		113_23CR04A	999	4	0.0956741	0.757615	0.0741732	56.2	0.0260974	1.14439	0.63966	0.242782	41.4134
			S	31.1855	7.57611	0.270503	58.9201	13287.4																																S	31.1876	0.0396537	7.57611	4.16844	6.86207	0.064559	58.9252	0.0242764	22598.2
	Information on Analysis				Results		40(r)/39(k)	± 2s	Age	± 2s	MSWD	39Ar(k)	K/Ca	± 2s		Results			40(a)/36(a)	± 2s	40(r)/39(k)	± 2s	Age	± 2s	MSWD		Results			40(a)/36(a)	± 2s	40(r)/39(k)	± 2s	Age	± 2s	MSWD		Information on Analysis and Constants Used in Calculations									Results		40(a)/36(a)
									(Ma)			(%,n)											(Ma)											(Ma)
	Sample = 003_23CR04A				Age Plateau Error Mean		20.8387	0.829597	129.334	4.97179	5.38986	4.41614	3.2056	2.20559		Normal Isochron			310.688	6.4538	18.731	1.18205	116.66	7.13273	0.882581		Inverse Isochron			310.651	6.43992	18.7411	1.1778	116.721	7.10686	0.872987		Sample = 003_23CR04A				Age Equations = Min et al. (2000)					Age Plateau Error Mean
	Material = Quartz							0.0398103		0.0384413	0.00104671	4								0.0207726		0.0631069		0.0611409	0.413714						0.0207304		0.0628462		0.0608874	0.417702		Material = Quartz				Negative Intensities = Allowed
	Location = R4 Rursee				Full External Error					5.62745	2.63299	2σ Confidence Limit				Full External Error								7.52063			Full External Error								7.49649			Location = R4 Rursee				Decay Constant 40K = 5.460 ± 0.053 E-10 1/a					Full External Error
	Analyst = Klaudia Kuiper				Analytical Error					4.97114	2.32161	Error Magnification				Analytical Error								7.13236			Analytical Error								7.10649			Analyst = Klaudia Kuiper				Decay Constant 39Ar = 2.940 ± 0.016 E-07 1/h					Analytical Error
	Project = VU123																																					Project = VU123				Decay Constant 37Ar = 8.230 ± 0.012 E-04 1/h
	Mass Discrimination Law = LIN				Total Fusion Age		225.515	0.276859	1068.06	1.12025		75	3.34415	0.278802																								Mass Discrimination Law = LIN				Decay Constant 36Cl = 2.257 ± 0.015 E-06 1/a					Total Fusion Age
	Irradiation = VU123							0.00122767		0.00104886						Statistics			2σ Confidence Limit	3		Convergence	8.31358e-05				Statistics			2σ Confidence Limit	3		Convergence	2.62076e-05				Irradiation = VU123				Decay Activity 40K(EC,β⁺) = 3.310 ± 0.030 1/gs
	J = 0.00351130 ± 0.00000112				Full External Error					18.3094									Error Magnification	1		Number of Iterations	7							Error Magnification	1		Number of Iterations	4				J = 0.00351130 ± 0.00000112				Decay Activity 40K(β⁻) = 27.890 ± 0.150 1/gs					Full External Error
	DRA = 25.522 ± 0.079 Ma				Analytical Error					0.993367									Number of Data Points	4		Calculated Line	Weighted York-2							Number of Data Points	4		Calculated Line	Weighted York-2				DRA = 25.522 ± 0.079 Ma				Atmospheric Ratio 40/36(a) = 298.56 ± 0.31					Analytical Error
																														Spreading Factor	0.148488							IGSN = Undefined				Atmospheric Ratio 38/36(a) = 0.1885 ± 0.0003
																																						Preferred Age = Undefined				Production Ratio 39/37(ca) = 0.000673 ± 0.000004					Normal Isochron		310.688
																																						Classification = Undefined				Production Ratio 36/37(ca) = 0.000264 ± 0.000002
																																						Experiment Type = Undefined				Production Ratio 40/39(k) = 0.000860 ± 0.000070					Full External Error
																																						Extraction Method = Undefined				Production Ratio 38/39(k) = 0.012110 ± 0.000030					Analytical Error
																																						Heating = 180 sec				Production Ratio 36/38(cl) = 262.80 ± 1.71
																																						Isolation = 5.00 min				Scaling Ratio K/Ca = 0.430
																																						Instrument = HELIX				Abundance Ratio 40K/K = 1.1700 ± 0.0100 E-04
																																						Lithology = Undefined				Atomic Weight K = 39.0983 ± 0.0001 g					Inverse Isochron		310.651
																																						Lat-Lon = Undefined - Undefined
																																						Feature = Undefined									Full External Error
																																															Analytical Error
[truncated: 150 more columns]

## Sheet: Rursee 5 BNV
	Incremental Crushing			36Ar(a) [fA]	37Ar(ca) [fA]	38Ar(cl) [fA]	39Ar(k) [fA]	40Ar(r) [fA]	Age	± 2s	40Ar(r)	39Ar(k)	K/Ca	± 2s		Normal Isochron			39(k)/36(a)	± 2s	40(a+r)/36(a)	± 2s			r.i.		Inverse Isochron			39(k)/40(a+r)	± 2s	36(a)/40(a+r)	± 2s			r.i.		Relative Abundances			36Ar [fA]	%1s	37Ar [fA]	%1s	38Ar [fA]	%1s	39Ar [fA]	%1s	40Ar [fA]
									(Ma)		(%)	(%)
	003_23CR05A	1		0.261766	0.017636	0.00278671	0.00894422	39.1593	5106.01	185.833	33.3804	0.0721096	0.218077	0.911331		003_23CR05A	1		0.0341688	0.00346925	448.157	7.58556			0.116078		003_23CR05A	1		7.6243e-05	7.69882e-06	0.00223136	3.77683e-05			0.0509069		003_23CR05A	1		0.261772	0.706172	0.017636	208.886	0.0522379	0.848766	0.00895609	5.01298	117.312
	004_23CR05A	3		1.19317	0.147278	0.0126936	0.0466602	292.218	5727.08	57.1247	45.064	0.376182	0.136232	0.0525633		004_23CR05A	3		0.039106	0.00121914	543.469	3.39438			0.121675		004_23CR05A	3		7.19563e-05	2.23356e-06	0.00184003	1.14924e-05			0.0790104		004_23CR05A	3		1.19322	0.24336	0.147278	19.2303	0.238172	0.333113	0.0467593	1.53584	648.452
	005_23CR05A	5		1.68119	0.174606	0.0108006	0.0651019	367.911	5547.71	42.1205	42.2961	0.524861	0.160326	0.0774547		005_23CR05A	5		0.0387237	0.000847057	517.4	3.10236			0.165842		005_23CR05A	5		7.48429e-05	1.62417e-06	0.00193274	1.15888e-05			0.109135		005_23CR05A	5		1.68124	0.233187	0.174606	24.1317	0.328493	0.280552	0.0652194	1.06576	869.847
	013_23CR05A	7		2.06616	0.253091	0.0121453	0.077322	594.002	6086.14	46.5113	49.0556	0.623382	0.131369	0.0358803		013_23CR05A	7		0.037423	0.000941338	586.05	3.38506			0.137086		013_23CR05A	7		6.38563e-05	1.598e-06	0.00170634	9.85591e-06			0.0930196		013_23CR05A	7		2.06623	0.223136	0.253091	13.6	0.402553	0.230134	0.0774923	1.23466	1210.87
	014_23CR05A	9		1.91166	0.248129	0.0151808	0.067042	513.784	6081.87	52.2575	47.3739	0.540503	0.116182	0.0278289		014_23CR05A	9		0.0350701	0.000995076	567.323	3.53246			0.141989		014_23CR05A	9		6.18167e-05	1.74152e-06	0.00176266	1.09753e-05			0.0780109		014_23CR05A	9		1.91173	0.250417	0.248129	11.8948	0.376341	0.303425	0.067209	1.39264	1084.53
	015_23CR05A	11		1.61245	0.187503	0.0137017	0.0491162	497.212	6575.23	52.078	50.8073	0.395982	0.112638	0.0387299		015_23CR05A	11		0.0304606	0.00086128	606.919	3.98557			0.156716		015_23CR05A	11		5.0189e-05	1.40566e-06	0.00164767	1.082e-05			0.0762553		015_23CR05A	11		1.6125	0.269708	0.187503	17.1362	0.318243	0.2784	0.0492424	1.38354	978.624
	016_23CR05A	13		1.50114	0.19941	0.0130031	0.0510411	491.802	6487.39	39.74	52.3203	0.411501	0.110063	0.0390677		016_23CR05A	13		0.0340015	0.000720725	626.179	3.82126			0.180139		016_23CR05A	13		5.43e-05	1.13893e-06	0.00159699	9.74565e-06			0.108899		016_23CR05A	13		1.5012	0.241349	0.19941	17.7178	0.296587	0.325343	0.0511753	1.02824	939.984
	018_23CR05A	17		1.45355	0.114655	0.0109237	0.0468881	493.669	6645.17	50.6936	53.2177	0.378019	0.175849	0.096555		018_23CR05A	17		0.0322577	0.000890358	638.19	3.92826			0.140232		018_23CR05A	17		5.05456e-05	1.38616e-06	0.00156693	9.64498e-06			0.0833112		018_23CR05A	17		1.45359	0.244047	0.114655	27.4203	0.285486	0.309841	0.0469653	1.35534	927.64
	019_23CR05A	21		1.28092	0.159946	0.0127262	0.0484583	465.102	6480.48	45.6968	54.877	0.390678	0.130276	0.0533431		019_23CR05A	21		0.0378307	0.000941353	661.659	4.17487			0.162874		019_23CR05A	21		5.71756e-05	1.40964e-06	0.00151135	9.53618e-06			0.0915388		019_23CR05A	21		1.28097	0.252835	0.159946	20.4369	0.254767	0.308873	0.0485659	1.21466	847.535
	020_23CR05A	25		1.07584	0.140288	0.00782101	0.0475875	398.727	6239.54	44.6447	55.3842	0.383658	0.145862	0.0580709		020_23CR05A	25		0.0442329	0.00107868	669.18	4.34297			0.172287		020_23CR05A	25		6.61002e-05	1.59503e-06	0.00149437	9.69843e-06			0.0948404		020_23CR05A	25		1.07588	0.26108	0.140288	19.8705	0.211193	0.471215	0.0476819	1.18803	719.93
	021_23CR05A	30		1.13031	0.125443	0.00842649	0.0538645	416.989	6099.7	57.4069	55.2702	0.434264	0.18464	0.112853		021_23CR05A	30		0.0476546	0.00152004	667.475	4.46698			0.141067		021_23CR05A	30		7.13953e-05	2.25996e-06	0.00149818	1.00264e-05			0.0692721		021_23CR05A	30		1.13035	0.274366	0.125443	30.5199	0.222143	0.311772	0.053949	1.56789	754.455
	023_23CR05A	35		0.947806	0.146469	0.0083071	0.056557	352.718	5719.74	47.2771	55.4854	0.455971	0.166038	0.0789241		023_23CR05A	35		0.0596715	0.0015664	670.701	4.72825			0.184969		023_23CR05A	35		8.89688e-05	2.30345e-06	0.00149098	1.05109e-05			0.0847497		023_23CR05A	35		0.947848	0.292517	0.146469	23.7324	0.187653	0.476005	0.0566556	1.27661	635.695
	024_23CR05A	40		0.844218	0.113561	0.0114173	0.0620883	321.552	5395.99	36.073	56.0584	0.500565	0.235097	0.119613		024_23CR05A	40		0.0735453	0.00145948	679.447	5.04663			0.265116		024_23CR05A	40		0.000108243	2.08441e-06	0.00147178	1.09318e-05			0.112502		024_23CR05A	40		0.844253	0.312545	0.113561	25.4217	0.171304	0.511259	0.0621647	0.940042	573.602
	025_23CR05A	50		0.910625	0.107586	0.00721046	0.0784541	346.256	5119.82	33.1385	56.0165	0.632509	0.313566	0.227049		025_23CR05A	50		0.0861541	0.00157333	678.8	4.94027			0.280721		025_23CR05A	50		0.000126921	2.24131e-06	0.00147319	1.07218e-05			0.121833		025_23CR05A	50		0.910657	0.305398	0.107586	36.1941	0.179813	0.382438	0.0785265	0.859059	618.132
	026_23CR05A	60		0.837794	0.100651	0.0118925	0.0949982	323.542	4678.14	29.2759	56.3983	0.76589	0.405849	0.277534		026_23CR05A	60		0.113391	0.0018393	684.744	5.08309			0.323745		026_23CR05A	60		0.000165596	2.56678e-06	0.0014604	1.08411e-05			0.140123		026_23CR05A	60		0.837826	0.312169	0.100651	34.1836	0.170967	0.401263	0.095066	0.747624	573.674
	028_23CR05A	70		0.793901	0.180622	0.0102716	0.105628	308.964	4422.82	25.5293	56.5877	0.851591	0.251465	0.0895416		028_23CR05A	70		0.13305	0.00188528	687.732	5.56162			0.427213		028_23CR05A	70		0.000193462	2.50957e-06	0.00145406	1.17588e-05			0.156755		028_23CR05A	70		0.793953	0.349811	0.180622	17.7933	0.161201	0.40228	0.10575	0.615043	545.991
	029_23CR05A	80		0.736596	0.163889	0.00740366	0.130619	290.674	3973.09	24.4567	56.9288	1.05307	0.342709	0.135247		029_23CR05A	80		0.177328	0.00244512	693.177	5.30849			0.393758		029_23CR05A	80		0.000255819	3.2922e-06	0.00144263	1.1048e-05			0.173188		029_23CR05A	80		0.736643	0.322388	0.163889	19.7225	0.147834	0.437994	0.130729	0.60866	510.592
	030_23CR05A	90		0.65899	0.0857832	0.00418946	0.151181	265.573	3595.09	20.7897	57.4434	1.21885	0.757817	0.528351		030_23CR05A	90		0.229414	0.00272708	701.56	5.85039			0.521183		030_23CR05A	90		0.000327005	3.39074e-06	0.00142539	1.18865e-05			0.206743		030_23CR05A	90		0.659014	0.359373	0.0857832	34.8568	0.13024	0.488256	0.151239	0.473026	462.321
	031_23CR05A	100		0.573175	0.108298	0.00749827	0.166139	234.647	3257.34	20.8661	57.827	1.33944	0.659661	0.499235		031_23CR05A	100		0.289858	0.00372479	707.942	7.05975			0.624441		031_23CR05A	100		0.000409438	4.18623e-06	0.00141255	1.40862e-05			0.190518		031_23CR05A	100		0.573207	0.447241	0.108298	37.8374	0.117554	0.603398	0.166212	0.46078	405.774
	033_23CR05A	120		0.528872	0.0998511	0.00434984	0.233954	197.344	2511.14	16.67	55.5516	1.88618	1.0075	0.721684		033_23CR05A	120		0.442364	0.00436875	671.701	5.94499			0.652215		033_23CR05A	120		0.000658574	5.17932e-06	0.00148876	1.31765e-05			0.306371		033_23CR05A	120		0.528901	0.377497	0.0998511	35.8141	0.106875	0.532084	0.234022	0.318037	355.244
	034_23CR05A	140		0.632145	0.151782	0.00451676	0.277126	219.788	2427.61	16.0677	53.8009	2.23423	0.7851	0.43182		034_23CR05A	140		0.438389	0.00408981	646.247	5.55681			0.680174		034_23CR05A	140		0.000678362	4.88446e-06	0.0015474	1.33054e-05			0.312918		034_23CR05A	140		0.632187	0.369302	0.151782	27.4995	0.127032	0.52531	0.277228	0.284634	408.522
	035_23CR05A	180		0.780515	0.194676	0.00399255	0.361513	301.729	2496.69	13.6934	56.4233	2.91457	0.798507	0.271984		035_23CR05A	180		0.463172	0.00366696	685.137	5.2549			0.692388		035_23CR05A	180		0.000676028	4.13534e-06	0.00145956	1.11946e-05			0.357712		035_23CR05A	180		0.780568	0.324181	0.194676	17.0293	0.155498	0.4074	0.361644	0.226969	534.76
	036_23CR05A	230		0.75888	0.171707	0.00796625	0.331325	278.432	2506.02	16.3916	55.1347	2.67119	0.829725	0.316492		036_23CR05A	230		0.436597	0.00434541	665.459	5.09316			0.544241		036_23CR05A	230		0.000656085	5.67133e-06	0.00150272	1.15012e-05			0.258767		036_23CR05A	230		0.758929	0.321916	0.171707	19.0683	0.155028	0.532111	0.331441	0.37929	505.004
	038_23CR05A	290		0.784519	0.157554	0.0118124	0.347426	312.078	2597.72	13.2658	57.1253	2.801	0.948201	0.393927		038_23CR05A	290		0.442852	0.00332932	696.356	5.30997			0.726129		038_23CR05A	290		0.000635956	3.5643e-06	0.00143605	1.09504e-05			0.386535		038_23CR05A	290		0.784566	0.322573	0.157554	20.7715	0.163902	0.612764	0.347532	0.19279	546.305
	039_23CR05A	370		0.72657	0.162413	0.00875158	0.37593	294.12	2409.34	14.8783	57.5527	3.03081	0.9953	0.40232		039_23CR05A	370		0.517404	0.00512913	703.367	6.30119			0.711455		039_23CR05A	370		0.000735611	5.31281e-06	0.00142173	1.27367e-05			0.263878		039_23CR05A	370		0.726617	0.397412	0.162413	20.2088	0.150262	0.420155	0.37604	0.296033	511.045
	040_23CR05A	470		0.673317	0.140692	0.00617786	0.36986	279.729	2364.16	13.7791	58.1854	2.98187	1.13041	0.597482		040_23CR05A	470		0.549311	0.00502727	714.009	6.3952			0.763714		040_23CR05A	470		0.000769332	4.79064e-06	0.00140054	1.25443e-05			0.315925		040_23CR05A	470		0.673357	0.395584	0.140692	26.4267	0.137577	0.528077	0.369955	0.229817	480.755
	041_23CR05A	590		0.674995	0.136284	0.00908506	0.386312	278.365	2300.33	14.2323	58.0058	3.11451	1.21889	0.488195		041_23CR05A	590		0.572319	0.00538079	710.956	5.95352			0.666566		041_23CR05A	590		0.000804999	5.89129e-06	0.00140656	1.17785e-05			0.287918		041_23CR05A	590		0.675035	0.362187	0.136284	20.024	0.141	0.505066	0.386404	0.299532	479.892
	049_23CR05A	750		0.928668	0.157531	0.00566731	0.394356	299.276	2368.69	14.4657	51.909	3.17936	1.07644	0.640384		049_23CR05A	750		0.424647	0.00352664	620.824	4.19486			0.571539		049_23CR05A	750		0.000684006	4.85995e-06	0.00161076	1.08838e-05			0.282945		049_23CR05A	750		0.928712	0.283145	0.157531	29.7438	0.185497	0.372691	0.394462	0.303535	576.54
	050_23CR05A	200		0.330022	0.128777	0.00619833	0.130204	132.242	2770.62	24.37	57.3037	1.04973	0.434764	0.318609		050_23CR05A	200		0.394531	0.00635031	699.265	5.58417			0.366099		050_23CR05A	200		0.000564208	8.53305e-06	0.00143007	1.14202e-05			0.138397		050_23CR05A	200		0.330059	0.342933	0.128777	36.6344	0.0699843	0.908034	0.130291	0.72715	230.773
	051_23CR05A	350		0.528021	0.0948878	0.00508402	0.218465	206.343	2667.81	17.0707	56.6894	1.7613	0.990013	1.09299		051_23CR05A	350		0.413744	0.00451384	689.346	5.35164			0.539824		051_23CR05A	350		0.000600197	5.62556e-06	0.00145065	1.12619e-05			0.19994		051_23CR05A	350		0.528048	0.338059	0.0948878	55.1994	0.107262	0.588502	0.218529	0.427653	363.99
	052_23CR05A	500		0.591059	0.138074	0.00587708	0.272263	237.367	2556.43	14.3063	57.3581	2.19502	0.847902	0.482145		052_23CR05A	500		0.460635	0.00408471	700.157	4.96799			0.575179		052_23CR05A	500		0.000657903	4.94958e-06	0.00142825	1.01342e-05			0.265191		052_23CR05A	500		0.591098	0.300767	0.138074	28.4298	0.120589	0.528373	0.272356	0.325487	413.834
	054_23CR05A	700		0.739845	0.177894	0.00649789	0.327321	298.247	2617.56	13.512	57.4507	2.63891	0.791192	0.444022		054_23CR05A	700		0.442418	0.00363258	701.681	5.03068			0.640945		054_23CR05A	700		0.000630512	4.15167e-06	0.00142515	1.02175e-05			0.289589		054_23CR05A	700		0.739895	0.307099	0.177894	28.059	0.149922	0.366993	0.327441	0.272131	519.135
	055_23CR05A	900		0.979755	0.125017	0.0115167	0.394746	341.424	2545.48	16.3025	53.8575	3.1825	1.35774	1.0417		055_23CR05A	900		0.402903	0.00394693	647.039	3.63114			0.328655		055_23CR05A	900		0.000622687	5.95061e-06	0.0015455	8.67324e-06			0.250341		055_23CR05A	900		0.979793	0.21252	0.125017	38.359	0.200981	0.484221	0.39483	0.441129	633.94
	056_23CR05A	250		0.185605	0.0446672	0.00244118	0.09139	72.1618	2421.67	27.951	56.5637	0.7368	0.879788	1.63376		056_23CR05A	250		0.492389	0.00976559	687.352	7.3568			0.427305		056_23CR05A	250		0.000716357	1.2944e-05	0.00145486	1.55715e-05			0.123323		056_23CR05A	250		0.185618	0.476129	0.0446672	92.8455	0.0385345	0.88921	0.0914201	0.869011	127.576
	057_23CR05A	500		0.376429	0.0677554	0.00260977	0.168615	138.904	2478.92	16.5598	55.2762	1.3594	1.07009	1.3402		057_23CR05A	500		0.447932	0.00471904	667.565	5.46854			0.591575		057_23CR05A	500		0.000670994	5.84908e-06	0.00149798	1.22711e-05			0.224783		057_23CR05A	500		0.376448	0.35723	0.0677554	62.6198	0.0756085	0.781181	0.16866	0.386615	251.291
	059_23CR05A	750		0.486032	0.0979907	0.00531524	0.237748	175.259	2330.23	16.2559	54.7053	1.91676	1.04328	0.841774		059_23CR05A	750		0.489162	0.0051537	659.151	4.75175			0.487909		059_23CR05A	750		0.00074211	6.99539e-06	0.0015171	1.09367e-05			0.219428		059_23CR05A	750		0.48606	0.304348	0.0979907	40.3403	0.0998114	0.547972	0.237814	0.429692	320.368
	060_23CR05A	999		0.589453	0.113183	0.00777626	0.306259	203.839	2197.56	14.8795	53.6664	2.46911	1.16352	0.831104		060_23CR05A	999		0.519565	0.00493863	644.371	4.35428			0.488205		060_23CR05A	999		0.000806314	6.90318e-06	0.0015519	1.04869e-05			0.247258		060_23CR05A	999		0.589486	0.27997	0.113183	35.713	0.122597	0.518211	0.306335	0.383836	379.826
	061_23CR05A	999		0.553615	0.0974077	0.00819666	0.260132	149.579	2014.63	14.7704	47.5055	2.09722	1.14834	0.963433		061_23CR05A	999		0.469879	0.00386295	568.746	3.88451			0.564117		061_23CR05A	999		0.000826166	5.89338e-06	0.00175826	1.20088e-05			0.307323		061_23CR05A	999		0.553645	0.281382	0.0974077	41.948	0.115703	0.454445	0.260197	0.299373	314.866
	062_23CR05A	999		0.403263	0.0190062	0.00253864	0.240463	113.743	1784.02	15.6995	48.5786	1.93865	5.44028	24.263		062_23CR05A	999		0.596293	0.00612487	580.615	5.6517			0.782528		062_23CR05A	999		0.001027	6.79501e-06	0.00172231	1.67649e-05			0.256362		062_23CR05A	999		0.40327	0.442251	0.0190062	222.994	0.0814658	0.621421	0.240476	0.260799	234.141
	064_23CR05A	999		0.359522	0.0492389	0.00295259	0.244431	92.3367	1538.79	16.3485	46.2433	1.97064	2.1346	3.30014		064_23CR05A	999		0.679878	0.00824281	555.391	4.48808			0.498998		064_23CR05A	999		0.00122414	1.30998e-05	0.00180053	1.455e-05			0.189801		064_23CR05A	999		0.359537	0.349575	0.0492389	77.2994	0.0736826	0.641099	0.244464	0.495055	199.676
	065_23CR05A	999		0.340785	0.0726804	0.0039712	0.237255	74.1674	1349.87	17.4725	42.1616	1.91279	1.40367	1.57989		065_23CR05A	999		0.696201	0.00878095	516.197	5.09529			0.644301		065_23CR05A	999		0.00134871	1.32205e-05	0.00193725	1.91222e-05			0.177966		065_23CR05A	999		0.340806	0.447772	0.0726804	56.2753	0.0710823	0.622399	0.237304	0.443788	175.912
	066_23CR05A	999		0.417596	0.0998327	0.00250827	0.24058	62.2847	1177.97	19.6474	33.314	1.9396	1.03623	0.798696		066_23CR05A	999		0.576107	0.00751916	447.71	3.85658			0.510696		066_23CR05A	999		0.00128679	1.46555e-05	0.00223359	1.92401e-05			0.171089		066_23CR05A	999		0.417624	0.378834	0.0998327	38.5349	0.0841386	0.521829	0.240648	0.531085	186.963
	067_23CR05A	999		0.270545	0.128761	0.00178875	0.211554	46.4909	1041.72	18.753	36.5308	1.70558	0.706489	0.395063		067_23CR05A	999		0.781955	0.0118267	470.402	4.68262			0.51804		067_23CR05A	999		0.00166231	2.17918e-05	0.00212584	2.11617e-05			0.161671		067_23CR05A	999		0.270579	0.441503	0.128761	27.9529	0.0553483	0.960148	0.21164	0.613558	127.265
	070_23CR05A	999		0.253451	-0.108462	0.00169934	0.228511	34.4478	773.554	20.8905	31.2825	1.84229	-0.905939	0.610089		070_23CR05A	999		0.901596	0.0114661	434.475	5.2752			0.600216		070_23CR05A	999		0.00207514	2.30885e-05	0.00230163	2.79454e-05			0.405194		070_23CR05A	999		0.253424	0.48139	-0.108462	33.669	0.0522422	0.776226	0.228438	0.415492	110.118
	071_23CR05A	999		0.233613	-0.0706768	0.00110073	0.210842	28.3138	703.339	22.6773	28.8735	1.69984	-1.28277	1.69331		071_23CR05A	999		0.902527	0.011873	419.759	5.44839			0.602124		071_23CR05A	999		0.00215011	2.50658e-05	0.00238232	3.0922e-05			0.433925		071_23CR05A	999		0.233595	0.506999	-0.0706768	66.0005	0.0476901	0.552452	0.210795	0.418898	98.0616
	072_23CR05A	999		0.242763	-0.0480482	0.00147155	0.21813	24.1977	598.845	21.2619	25.0294	1.75859	-1.95212	2.58805		072_23CR05A	999		0.898531	0.0100284	398.236	4.53151			0.489948		072_23CR05A	999		0.00225628	2.56859e-05	0.00251107	2.85734e-05			0.5192		072_23CR05A	999		0.242751	0.394413	-0.0480482	66.287	0.0498738	0.645143	0.218097	0.394723	96.6771
	073_23CR05A	999		0.233776	0.0304461	0.000843805	0.226165	21.0668	515.075	22.2722	23.1852	1.82337	3.19419	7.51777		073_23CR05A	999		0.967442	0.0114418	388.675	4.97389			0.591837		073_23CR05A	999		0.00248907	2.7772e-05	0.00257284	3.29247e-05			0.5196		073_23CR05A	999		0.233784	0.473182	0.0304461	117.678	0.0476494	0.650798	0.226185	0.354422	90.8632
	075_23CR05A	999		0.215502	0.0132704	0.000649378	0.207973	16.9911	459.044	23.6117	20.8912	1.67671	6.7389	35.375		075_23CR05A	999		0.965063	0.0124963	377.404	4.95459			0.489408		075_23CR05A	999		0.0025571	3.36941e-05	0.00264968	3.47851e-05			0.515374		075_23CR05A	999		0.215505	0.456028	0.0132704	262.468	0.04379	1.03667	0.207981	0.459387	81.3314
	076_23CR05A	999		0.21534	0.0237118	0.000712819	0.217153	15.4634	406.16	23.5464	19.3885	1.75072	3.93795	13.5365		076_23CR05A	999		1.00842	0.0123494	370.369	5.03079			0.55606		076_23CR05A	999		0.00272275	3.32889e-05	0.00270001	3.66747e-05			0.554018		076_23CR05A	999		0.215347	0.480835	0.0237118	171.873	0.0439341	0.778806	0.217169	0.37882	79.7555
	077_23CR05A	999		0.225113	0.0239139	0	0.218389	13.2298	350.959	24.7575	16.4468	1.76068	3.92689	12.2852		077_23CR05A	999		0.970129	0.0127172	357.329	4.87704			0.533437		077_23CR05A	999		0.00271494	3.51103e-05	0.00279854	3.81961e-05			0.514673		077_23CR05A	999		0.225119	0.488435	0.0239139	156.424	0.0449514	0.826242	0.218405	0.43685	80.4397
	078_23CR05A	999		0.239286	0.0520868	0.00025744	0.206776	11.7502	331.066	27.6446	14.1243	1.66706	1.70703	2.18089		078_23CR05A	999		0.864137	0.0101072	347.665	4.78809			0.645332		078_23CR05A	999		0.00248554	2.70652e-05	0.00287633	3.96131e-05			0.571592		078_23CR05A	999		0.239299	0.509742	0.0520868	63.8792	0.0478668	0.807762	0.206811	0.286331	83.1915
	086_23CR05A	999		0.212745	0.0264889	0.00214993	0.19311	9.88124	300.667	28.7007	13.4625	1.55688	3.13479	8.76622		086_23CR05A	999		0.907705	0.0123037	345.006	5.09005			0.557986		086_23CR05A	999		0.00263098	3.51238e-05	0.0028985	4.2763e-05			0.538583		086_23CR05A	999		0.212753	0.528132	0.0264889	139.821	0.0445909	1.28519	0.193127	0.424457	73.3985
	087_23CR05A	999		0.227705	0.0978748	0.00256873	0.206848	9.52092	272.598	26.5252	12.2843	1.66764	0.908759	0.608099		087_23CR05A	999		0.908401	0.0129134	340.372	4.56068			0.435776		087_23CR05A	999		0.00266884	3.91881e-05	0.00293796	3.9366e-05			0.490639		087_23CR05A	999		0.227732	0.455464	0.0978748	33.4532	0.0479961	0.767179	0.206914	0.545331	77.5048
	088_23CR05A	999		0.26184	0.0653618	0.00100209	0.203264	9.07715	265.034	31.1464	10.4033	1.63875	1.33723	1.48361		088_23CR05A	999		0.776291	0.0101659	333.227	4.59623			0.615169		088_23CR05A	999		0.00232962	2.7516e-05	0.00300096	4.13925e-05			0.485733		088_23CR05A	999		0.261858	0.52701	0.0653618	55.4719	0.0528206	0.629717	0.203308	0.388237	87.2524
	089_23CR05A	999		0.242259	-0.00340838	0.00175577	0.214859	9.46029	261.569	29.6598	11.5667	1.73222	-27.1065	588.957		089_23CR05A	999		0.886899	0.0124803	337.61	5.04516			0.642145		089_23CR05A	999		0.00262699	3.23092e-05	0.00296199	4.42633e-05			0.480335		089_23CR05A	999		0.242258	0.581006	-0.00340838	1086.38	0.0500234	0.750432	0.214856	0.396641	81.7892
	091_23CR05A	999	4	0.222442	0.0751327	0.00217904	0.200103	7.70089	230.609	29.2233	10.3907	1.61326	1.14523	1.06271		091_23CR05A	999	4	0.899575	0.0119094	333.18	4.87172			0.565959		091_23CR05A	999	4	0.00269997	3.51986e-05	0.00300138	4.3886e-05			0.546858		091_23CR05A	999	4	0.222463	0.523283	0.0751327	46.3956	0.0465326	0.779269	0.200154	0.405043	74.1134
	092_23CR05A	999	4	0.237347	0.0764593	0.000724604	0.198478	6.90845	209.787	31.8903	8.88306	1.60016	1.11622	1.19841		092_23CR05A	999	4	0.836235	0.0112259	327.667	4.87697			0.627694		092_23CR05A	999	4	0.00255209	3.13511e-05	0.00305188	4.54239e-05			0.525667		092_23CR05A	999	4	0.237368	0.559883	0.0764593	53.6801	0.0478681	0.817908	0.19853	0.369761	77.771
	093_23CR05A	999	4	0.262722	0.0970355	0.000793236	0.204619	6.99848	206.341	27.5421	8.19141	1.64967	0.906741	0.60522		093_23CR05A	999	4	0.778843	0.00961499	325.198	3.82255			0.385529		093_23CR05A	999	4	0.00239498	3.20143e-05	0.00307505	3.61457e-05			0.5233		093_23CR05A	999	4	0.262748	0.373931	0.0970355	33.3697	0.0527942	0.762385	0.204684	0.490797	85.4368
	094_23CR05A	999	4	0.240911	0.0580989	0.0014053	0.217061	7.102	197.857	26.5877	8.98663	1.74998	1.6065	1.86559		094_23CR05A	999	4	0.900999	0.0100004	328.04	4.29954			0.537131		094_23CR05A	999	4	0.00274662	3.23475e-05	0.00304841	3.99548e-05			0.606681		094_23CR05A	999	4	0.240927	0.441938	0.0580989	58.0626	0.0494456	0.605422	0.2171	0.33539	79.0285
	096_23CR05A	999	4	0.211515	0.118836	0.00225923	0.194783	5.82531	181.666	31.1393	8.44549	1.57037	0.704807	0.368966		096_23CR05A	999	4	0.920895	0.0130162	326.101	5.13588			0.581109		096_23CR05A	999	4	0.00282396	3.88337e-05	0.00306654	4.8296e-05			0.547998		096_23CR05A	999	4	0.211547	0.568579	0.118836	26.1716	0.0444886	0.915256	0.194863	0.419272	68.9754
	097_23CR05A	999	4	0.218278	0.0811268	0.000255855	0.195098	5.73912	178.829	29.1048	8.09372	1.57291	1.03409	0.905818		097_23CR05A	999	4	0.893809	0.012744	324.853	4.59824			0.433677		097_23CR05A	999	4	0.00275143	4.16005e-05	0.00307832	4.35731e-05			0.527226		097_23CR05A	999	4	0.218299	0.467708	0.0811268	43.7946	0.0437638	0.902277	0.195153	0.537686	70.9082
	098_23CR05A	999	4	0.255595	0.138233	0.00128822	0.20551	6.20192	183.236	32.4998	7.51633	1.65685	0.639278	0.348616		098_23CR05A	999	4	0.804044	0.0104319	322.825	4.67947			0.654009		098_23CR05A	999	4	0.00249065	2.86645e-05	0.00309766	4.49017e-05			0.522211		098_23CR05A	999	4	0.255632	0.554429	0.138233	27.2643	0.0519566	0.725729	0.205603	0.33628	82.5125
	099_23CR05A	999	4	0.246124	0.0755944	0.000616661	0.181905	5.19261	173.779	33.262	6.60003	1.46655	1.03472	1.07871		099_23CR05A	999	4	0.739077	0.00939412	319.658	4.31838			0.513236		099_23CR05A	999	4	0.00231209	2.99507e-05	0.00312835	4.22621e-05			0.539282		099_23CR05A	999	4	0.246145	0.469328	0.0755944	52.1241	0.049214	0.600813	0.181956	0.42809	78.6756
	101_23CR05A	999	4	0.234522	0.120179	0.000428854	0.187139	4.85843	158.71	33.7001	6.48852	1.50874	0.669585	0.321976		101_23CR05A	999	4	0.79796	0.0110469	319.276	4.70515			0.562015		101_23CR05A	999	4	0.00249928	3.34857e-05	0.00313208	4.61573e-05			0.519206		101_23CR05A	999	4	0.234554	0.535317	0.120179	24.039	0.0469025	1.03003	0.18722	0.438421	74.8774
			S	40.0441	6.54576	0.350154	12.4036	12079.7																																S	40.046	0.0448101	6.54576	4.54343	8.04856	0.0628474	12.408	0.0571867	24035.3
	Information on Analysis				Results		40(r)/39(k)	± 2s	Age	± 2s	MSWD	39Ar(k)	K/Ca	± 2s		Results			40(a)/36(a)	± 2s	40(r)/39(k)	± 2s	Age	± 2s	MSWD		Results			40(a)/36(a)	± 2s	40(r)/39(k)	± 2s	Age	± 2s	MSWD		Information on Analysis and Constants Used in Calculations									Results		40(a)/36(a)
									(Ma)			(%,n)											(Ma)											(Ma)
	Sample = 003_23CR05A				Age Plateau Error Mean		31.8104	2.48704	192.642	14.2967	2.00874	14.3885	0.745335	0.177061		Normal Isochron Error Chron			288.968	28.9563	43.1786	34.5364	256.848	191.677	2.20117		Inverse Isochron Error Chron			288.784	29.0129	43.4909	23.2703	258.581	129.028	2.21407		Sample = 003_23CR05A				Age Equations = Min et al. (2000)					Age Plateau Error Mean
	Material = Quartz							0.0781832		0.0742137	0.0413897	9								0.100206		0.799851		0.746266	0.0311085						0.100466		0.535061		0.498985	0.0301149		Material = Quartz				Negative Intensities = Allowed
	Location = R5 Rursee				Full External Error					14.8127	2	2σ Confidence Limit				Full External Error								191.745			Full External Error								129.13			Location = R5 Rursee				Decay Constant 40K = 5.460 ± 0.053 E-10 1/a					Full External Error
	Analyst = Klaudia Kuiper				Analytical Error					14.2959	1.4173	Error Magnification				Analytical Error								191.677			Analytical Error								129.028			Analyst = Klaudia Kuiper				Decay Constant 39Ar = 2.940 ± 0.016 E-07 1/h					Analytical Error
	Project = VU123																																					Project = VU123				Decay Constant 37Ar = 8.230 ± 0.012 E-04 1/h
	Mass Discrimination Law = LIN				Total Fusion Age		973.882	1.89363	2710.96	2.99531		64	0.814812	0.0740466																								Mass Discrimination Law = LIN				Decay Constant 36Cl = 2.257 ± 0.015 E-06 1/a					Total Fusion Age
	Irradiation = VU123							0.00194442		0.00110489						Statistics			2σ Confidence Limit	2.06904		Convergence	0.000146578				Statistics			2σ Confidence Limit	2.06904		Convergence	4.49724e-06				Irradiation = VU123				Decay Activity 40K(EC,β⁺) = 3.310 ± 0.030 1/gs
	J = 0.00348680 ± 0.00000146				Full External Error					37.4292									Error Magnification	1.48364		Number of Iterations	5							Error Magnification	1.48797		Number of Iterations	5				J = 0.00348680 ± 0.00000146				Decay Activity 40K(β⁻) = 27.890 ± 0.150 1/gs					Full External Error
	DRA = 25.522 ± 0.079 Ma				Analytical Error					2.7497									Number of Data Points	9		Calculated Line	Weighted York-2							Number of Data Points	9		Calculated Line	Weighted York-2				DRA = 25.522 ± 0.079 Ma				Atmospheric Ratio 40/36(a) = 298.56 ± 0.31					Analytical Error
																														Spreading Factor	0.0227196							IGSN = Undefined				Atmospheric Ratio 38/36(a) = 0.1885 ± 0.0003
																																						Preferred Age = Undefined				Production Ratio 39/37(ca) = 0.000673 ± 0.000004					Normal Isochron Error Chron		288.968
																																						Classification = Undefined				Production Ratio 36/37(ca) = 0.000264 ± 0.000002
																																						Experiment Type = Undefined				Production Ratio 40/39(k) = 0.000860 ± 0.000070					Full External Error
																																						Extraction Method = Undefined				Production Ratio 38/39(k) = 0.012110 ± 0.000030					Analytical Error
																																						Heating = 180 sec				Production Ratio 36/38(cl) = 262.80 ± 1.71
																																						Isolation = 5.00 min				Scaling Ratio K/Ca = 0.430
																																						Instrument = HELIX				Abundance Ratio 40K/K = 1.1700 ± 0.0100 E-04
																																						Lithology = Undefined				Atomic Weight K = 39.0983 ± 0.0001 g					Inverse Isochron Error Chron		288.784
																																						Lat-Lon = Undefined - Undefined
																																						Feature = Undefined									Full External Error
																																															Analytical Error
[truncated: 150 more columns]

## Sheet: Rursee 6 BPV
	Incremental Crushing			36Ar(a) [fA]	37Ar(ca) [fA]	38Ar(cl) [fA]	39Ar(k) [fA]	40Ar(r) [fA]	Age	± 2s	40Ar(r)	39Ar(k)	K/Ca	± 2s		Normal Isochron			39(k)/36(a)	± 2s	40(a+r)/36(a)	± 2s			r.i.		Inverse Isochron			39(k)/40(a+r)	± 2s	36(a)/40(a+r)	± 2s			r.i.		Relative Abundances			36Ar [fA]	%1s	37Ar [fA]	%1s	38Ar [fA]	%1s	39Ar [fA]	%1s	40Ar [fA]
									(Ma)		(%)	(%)
	003_23CR06A	1		0.577111	0.170616	0.00629109	0.0237008	174.522	6011.46	167.589	50.32	0.110598	0.0597327	0.0404558		003_23CR06A	1		0.041068	0.0038921	600.967	3.94987			0.043487		003_23CR06A	1		6.83365e-05	6.47244e-06	0.00166399	1.09366e-05			0.0258797		003_23CR06A	1		0.577159	0.260195	0.170616	33.5318	0.115363	0.445546	0.0238156	4.70587	346.824
	004_23CR06A	3		1.72023	0.290131	0.0102723	0.0751365	468.767	5720.41	57.3669	47.7185	0.350621	0.111359	0.0382574		004_23CR06A	3		0.0436781	0.00138647	571.062	3.1734			0.0997426		004_23CR06A	3		7.64857e-05	2.42268e-06	0.00175112	9.73102e-06			0.0754828		004_23CR06A	3		1.72032	0.209715	0.290131	17.1053	0.335446	0.188844	0.0753318	1.56852	982.36
	005_23CR06A	5		2.42493	0.50297	0.0179622	0.0955928	674.368	5936	43.8427	48.2258	0.446079	0.0817244	0.0186446		005_23CR06A	5		0.0394208	0.000932001	576.658	3.02559			0.11853		005_23CR06A	5		6.83608e-05	1.61349e-06	0.00173413	9.09857e-06			0.103567		005_23CR06A	5		2.42507	0.191711	0.50297	11.3472	0.476219	0.2624	0.0959313	1.16166	1398.36
	013_23CR06A	7		2.58876	0.406652	0.0165522	0.11008	777.574	5938.28	40.2844	50.1508	0.513682	0.1164	0.0280413		013_23CR06A	7		0.0425223	0.000921192	598.926	3.03335			0.116691		013_23CR06A	7		7.09976e-05	1.53815e-06	0.00166966	8.45621e-06			0.117088		013_23CR06A	7		2.58887	0.1789	0.406652	11.9977	0.505866	0.208418	0.110354	1.06524	1550.47
	014_23CR06A	9		2.76486	0.292894	0.0180924	0.114899	896.068	6112.72	40.332	52.0502	0.536172	0.168685	0.066665		014_23CR06A	9		0.041557	0.000902708	622.652	3.2335			0.12265		014_23CR06A	9		6.67421e-05	1.4487e-06	0.00160603	8.34031e-06			0.116507		014_23CR06A	9		2.76495	0.185974	0.292894	19.7312	0.54066	0.152444	0.115097	1.0677	1721.55
	015_23CR06A	11		2.18619	0.406047	0.0125274	0.0951813	787.888	6218.07	45.7956	54.6917	0.444158	0.100796	0.0285379		015_23CR06A	11		0.0435374	0.00109136	658.953	3.57309			0.119724		015_23CR06A	11		6.60707e-05	1.65206e-06	0.00151756	8.22878e-06			0.0968324		015_23CR06A	11		2.18631	0.201689	0.406047	14.1021	0.425777	0.212705	0.0954545	1.23282	1440.6
	016_23CR06A	13		1.87838	0.363839	0.0135754	0.0752282	736.642	6516.07	55.4834	56.7761	0.351048	0.0889079	0.0269996		016_23CR06A	13		0.0400496	0.00122326	690.73	3.73078			0.0902442		016_23CR06A	13		5.79816e-05	1.7704e-06	0.00144774	7.81958e-06			0.0866198		016_23CR06A	13		1.87848	0.192912	0.363839	15.1082	0.36856	0.302716	0.0754731	1.50923	1297.45
	018_23CR06A	17		1.74736	0.265183	0.00927495	0.0768712	720.921	6439.34	43.417	58.0165	0.358716	0.124649	0.0493348		018_23CR06A	17		0.0439927	0.0010457	711.136	3.80194			0.124614		018_23CR06A	17		6.18625e-05	1.46644e-06	0.0014062	7.51796e-06			0.10058		018_23CR06A	17		1.74744	0.198963	0.265183	19.7548	0.339584	0.344749	0.0770497	1.16811	1242.61
	019_23CR06A	21		1.44727	0.142405	0.0103851	0.0735381	602.209	6199.02	46.5013	58.2236	0.343162	0.222052	0.170522		019_23CR06A	21		0.0508118	0.00130591	714.662	3.96177			0.126654		019_23CR06A	21		7.10991e-05	1.81989e-06	0.00139926	7.7569e-06			0.0894037		019_23CR06A	21		1.44731	0.212388	0.142405	38.3759	0.284085	0.244711	0.073634	1.26474	1034.31
	020_23CR06A	25		1.29598	0.155739	0.0100811	0.0748368	533.145	5953.25	31.1845	57.946	0.349222	0.206627	0.162786		020_23CR06A	25		0.0577454	0.000966889	709.944	3.79238			0.17335		020_23CR06A	25		8.1338e-05	1.3559e-06	0.00140856	7.52426e-06			0.146325		020_23CR06A	25		1.29603	0.196871	0.155739	39.3827	0.255279	0.267709	0.0749416	0.810713	920.072
	021_23CR06A	30		1.18573	0.14878	0.00984444	0.0860545	496.371	5583.36	31.9921	58.3702	0.401569	0.248712	0.177191		021_23CR06A	30		0.0725749	0.00126776	717.179	3.85561			0.172627		021_23CR06A	30		0.000101195	1.75748e-06	0.00139435	7.49615e-06			0.13592		021_23CR06A	30		1.18578	0.201307	0.14878	35.6116	0.234397	0.35315	0.0861546	0.847903	850.383
	023_23CR06A	35		1.10613	0.204098	0.0099441	0.089279	487.877	5489.24	30.5853	59.6336	0.416616	0.188096	0.126464		023_23CR06A	35		0.0807128	0.00135188	739.626	4.03544			0.185776		023_23CR06A	35		0.000109127	1.8141e-06	0.00135203	7.37677e-06			0.141028		023_23CR06A	35		1.10619	0.205999	0.204098	33.607	0.219531	0.289099	0.0894164	0.808834	818.124
	024_23CR06A	40		0.987232	0.264642	0.00607402	0.0964099	432.216	5146.73	29.0015	59.4549	0.449892	0.15665	0.0743695		024_23CR06A	40		0.0976568	0.00156663	736.366	4.31765			0.22892		024_23CR06A	40		0.00013262	2.09131e-06	0.00135802	7.9627e-06			0.138947		024_23CR06A	40		0.987304	0.231994	0.264642	23.725	0.193335	0.319812	0.096588	0.765155	726.964
	025_23CR06A	50		0.980514	0.234483	0.00714406	0.132974	432.908	4602.14	24.309	59.6579	0.620516	0.243851	0.119605		025_23CR06A	50		0.135617	0.00183196	740.071	4.31284			0.269263		025_23CR06A	50		0.000183248	2.41751e-06	0.00135122	7.87438e-06			0.166025		025_23CR06A	50		0.98058	0.230179	0.234483	24.516	0.193581	0.274524	0.133132	0.633561	725.651
	026_23CR06A	60		0.858776	0.221322	0.00779601	0.154453	380.924	4140.71	19.1165	59.7696	0.720749	0.300084	0.156547		026_23CR06A	60		0.179853	0.00190694	742.126	4.63345			0.3954		026_23CR06A	60		0.000242348	2.41195e-06	0.00134748	8.41298e-06			0.206096		026_23CR06A	60		0.858838	0.255782	0.221322	26.0797	0.171546	0.356307	0.154602	0.46321	637.32
	028_23CR06A	70		0.845334	0.236284	0.00896161	0.185467	384.793	3859.9	20.405	60.3904	0.865474	0.337522	0.167627		028_23CR06A	70		0.219401	0.0025492	753.757	4.23427			0.288648		028_23CR06A	70		0.000291077	3.3044e-06	0.00132669	7.45273e-06			0.199412		028_23CR06A	70		0.845401	0.217	0.236284	24.8261	0.170553	0.288774	0.185626	0.538002	637.176
	029_23CR06A	80		0.815752	0.215265	0.00657884	0.218919	368.477	3528.05	16.7108	60.2059	1.02157	0.4373	0.244792		029_23CR06A	80		0.268365	0.0025314	750.263	4.42711			0.393529		029_23CR06A	80		0.000357694	3.19905e-06	0.00133287	7.86491e-06			0.244727		029_23CR06A	80		0.815812	0.233982	0.215265	27.986	0.162999	0.488062	0.219064	0.408796	612.029
	030_23CR06A	90		0.678379	0.23818	0.00831555	0.241852	321.725	3166.69	13.2081	61.3672	1.12859	0.436628	0.210668		030_23CR06A	90		0.356514	0.00275063	772.815	5.10648			0.603359		030_23CR06A	90		0.000461318	2.97787e-06	0.00129397	8.55008e-06			0.302474		030_23CR06A	90		0.678446	0.277269	0.23818	24.1229	0.139119	0.424934	0.242012	0.267521	524.262
	031_23CR06A	100		0.592097	0.167253	0.00494042	0.258928	279.837	2859.92	15.4655	61.2853	1.20827	0.665693	0.420533		031_23CR06A	100		0.437306	0.00430798	771.18	5.12062			0.477245		031_23CR06A	100		0.000567061	5.03058e-06	0.00129671	8.61014e-06			0.218519		031_23CR06A	100		0.592144	0.27933	0.167253	31.5835	0.119686	0.506405	0.25904	0.405265	456.614
	033_23CR06A	120		0.566963	0.210977	0.00541492	0.313075	272.664	2555	13.6964	61.6975	1.46095	0.63809	0.350077		033_23CR06A	120		0.552197	0.00497761	779.481	5.16943			0.513707		033_23CR06A	120		0.000708416	5.65925e-06	0.00128291	8.50809e-06			0.250513		033_23CR06A	120		0.567021	0.277041	0.210977	27.4294	0.116079	0.483269	0.313217	0.355098	441.937
	034_23CR06A	140		0.526315	0.171835	0.00640568	0.342032	260.996	2375.99	12.2843	62.4194	1.59608	0.855901	0.646164		034_23CR06A	140		0.649862	0.00563469	794.453	5.68222			0.618048		034_23CR06A	140		0.000818	5.76552e-06	0.00125873	9.0029e-06			0.254463		034_23CR06A	140		0.526364	0.309504	0.171835	37.7464	0.109758	0.411973	0.342148	0.303153	418.133
	035_23CR06A	180		0.592588	0.194308	0.00318365	0.42098	295.338	2265.43	11.2544	62.5369	1.96448	0.93162	0.680388		035_23CR06A	180		0.710409	0.00597498	796.946	6.22114			0.729117		035_23CR06A	180		0.000891414	5.34365e-06	0.00125479	9.79518e-06			0.279236		035_23CR06A	180		0.592641	0.345897	0.194308	36.5156	0.119985	0.473195	0.421111	0.23876	472.261
	036_23CR06A	230		0.585219	0.186219	0.00607772	0.476264	299.325	2124.83	10.1883	63.1422	2.22246	1.09974	0.713066		036_23CR06A	230		0.813821	0.0053949	810.034	4.50425			0.490626		036_23CR06A	230		0.00100468	6.24956e-06	0.00123452	6.86461e-06			0.371058		036_23CR06A	230		0.585272	0.212597	0.186219	32.4186	0.122159	0.354271	0.476389	0.254052	474.048
	038_23CR06A	290		0.61386	0.133108	0.00763589	0.487838	309.294	2135.85	12.4253	62.7921	2.27647	1.57594	1.36355		038_23CR06A	290		0.794706	0.00723992	802.411	5.28825			0.509869		038_23CR06A	290		0.000990397	7.99736e-06	0.00124624	8.2133e-06			0.240925		038_23CR06A	290		0.613899	0.276615	0.133108	43.2599	0.129256	0.377416	0.487928	0.361726	492.569
	039_23CR06A	370		0.580211	0.124233	0.00241902	0.485832	291.542	2067.14	10.5159	62.7282	2.26711	1.68158	1.8166		039_23CR06A	370		0.837337	0.00642685	801.036	5.37734			0.626336		039_23CR06A	370		0.00104532	6.56405e-06	0.00124838	8.38037e-06			0.30347		039_23CR06A	370		0.580245	0.284008	0.124233	54.014	0.117672	0.26324	0.485916	0.257855	464.77
	040_23CR06A	470		0.571918	0.150281	0.00681569	0.468187	287.417	2095.42	9.69832	62.7316	2.18477	1.33963	1.10327		040_23CR06A	470		0.818626	0.0052675	801.109	4.87391			0.613554		040_23CR06A	470		0.00102187	5.6323e-06	0.00124827	7.59441e-06			0.387533		040_23CR06A	470		0.571961	0.245011	0.150281	41.1777	0.120292	0.344268	0.468288	0.208239	458.169
	041_23CR06A	590		0.589122	0.128876	0.00566783	0.456491	292.865	2150.8	10.9107	62.4774	2.13019	1.5231	1.64286		041_23CR06A	590		0.774867	0.00592423	795.681	5.12222			0.582697		041_23CR06A	590		0.000973841	6.35141e-06	0.00125678	8.09059e-06			0.303975		041_23CR06A	590		0.589158	0.26773	0.128876	53.9307	0.122245	0.402074	0.456577	0.272584	468.753
	049_23CR06A	750		0.569396	0.302153	0.00632407	0.464803	283.884	2089.04	10.9607	62.5456	2.16898	0.661471	0.249971		049_23CR06A	750		0.816308	0.00660501	797.129	5.49777			0.62317		049_23CR06A	750		0.00102406	6.75296e-06	0.0012545	8.65224e-06			0.281256		049_23CR06A	750		0.569479	0.294802	0.302153	18.8931	0.119284	0.605794	0.465006	0.276762	453.883
	050_23CR06A	200		0.330341	0.351556	0.00225203	0.228468	153.405	2208.82	16.1832	60.8674	1.06613	0.279446	0.0970908		050_23CR06A	200		0.691612	0.00867921	762.945	6.53379			0.560906		050_23CR06A	200		0.000906503	9.51882e-06	0.00131071	1.12248e-05			0.145225		050_23CR06A	200		0.330435	0.388063	0.351556	17.365	0.067288	0.544531	0.228704	0.49212	252.032
	051_23CR06A	350		0.513024	0.461063	0.00562505	0.398445	228.02	2008.8	12.3215	59.8181	1.85932	0.371601	0.0963245		051_23CR06A	350		0.77666	0.00730596	743.023	5.59894			0.620475		051_23CR06A	350		0.00104527	7.91288e-06	0.00134585	1.01415e-05			0.224384		051_23CR06A	350		0.513148	0.3315	0.461063	12.9564	0.107155	0.423145	0.398756	0.333158	381.189
	052_23CR06A	500		0.575569	0.602631	0.00433178	0.51495	263.495	1874.92	10.8915	60.5266	2.40299	0.367436	0.0852659		052_23CR06A	500		0.894679	0.00736556	756.358	5.49438			0.645064		052_23CR06A	500		0.00118288	7.79181e-06	0.00132212	9.60425e-06			0.296589		052_23CR06A	500		0.57573	0.31045	0.602631	11.5997	0.119063	0.41299	0.515355	0.269812	435.337
	054_23CR06A	700		0.588988	0.285466	0.0088549	0.652005	270.025	1636.38	8.06553	60.5609	3.04255	0.982123	0.400922		054_23CR06A	700		1.10699	0.00606256	757.016	4.45786			0.66459		054_23CR06A	700		0.00146231	6.82822e-06	0.00132098	7.77887e-06			0.481646		054_23CR06A	700		0.589068	0.231434	0.285466	20.4105	0.127775	0.486604	0.652197	0.146121	445.874
	055_23CR06A	900		0.567371	0.200285	0.00595531	0.761817	248.458	1390.74	8.53329	59.4607	3.55498	1.63557	0.91604		055_23CR06A	900		1.34271	0.00976828	736.472	4.80685			0.617995		055_23CR06A	900		0.00182317	1.10655e-05	0.00135782	8.86233e-06			0.33462		055_23CR06A	900		0.567426	0.270813	0.200285	28.0026	0.12213	0.478825	0.761952	0.242711	417.853
	056_23CR06A	250		0.0612576	0.0516209	0.00107501	0.0885973	26.1673	1296.38	16.5381	58.8605	0.413435	0.738012	1.67707		056_23CR06A	250		1.44631	0.0296101	725.728	13.1717			0.835659		056_23CR06A	250		0.0019929	2.25055e-05	0.00137793	2.50089e-05			0.0922058		056_23CR06A	250		0.0612718	0.8805	0.0516209	113.62	0.013695	1.861	0.088632	0.519016	44.4565
	057_23CR06A	500		0.116138	-0.00301688	0.00157155	0.18429	48.2597	1187.93	12.1338	58.1905	0.85998	-26.2671	939.383		057_23CR06A	500		1.58682	0.0246274	714.097	10.2894			0.86319		057_23CR06A	500		0.00222213	1.75567e-05	0.00140037	2.01778e-05			0.128113		057_23CR06A	500		0.116138	0.694571	-0.00301688	1788.14	0.0256953	1.22019	0.184288	0.345268	82.934
	059_23CR06A	750		0.204981	0.115616	0.00121681	0.28392	69.4067	1128.89	11.5783	53.142	1.3249	1.05595	0.858485		059_23CR06A	750		1.3851	0.0173219	637.16	6.40831			0.695224		059_23CR06A	750		0.00217387	1.97646e-05	0.00156946	1.57851e-05			0.149942		059_23CR06A	750		0.205012	0.467449	0.115616	40.6476	0.043294	0.887247	0.283998	0.414922	130.606
	060_23CR06A	999		0.217043	0.161101	0.00278824	0.387131	86.7768	1057.53	8.38924	57.2491	1.80653	1.0333	0.683049		060_23CR06A	999		1.78366	0.0182399	698.374	7.03456			0.854463		060_23CR06A	999		0.00255402	1.39903e-05	0.0014319	1.44232e-05			0.243701		060_23CR06A	999		0.217087	0.46894	0.161101	33.0511	0.048389	0.66083	0.38724	0.203198	151.577
	061_23CR06A	999		0.196989	0.135684	0.00201992	0.38296	77.9943	982.588	8.06432	57.0102	1.78706	1.21365	1.04031		061_23CR06A	999		1.94407	0.0194844	694.493	6.54938			0.796321		061_23CR06A	999		0.00279927	1.74483e-05	0.0014399	1.35789e-05			0.232521		061_23CR06A	999		0.197025	0.433627	0.135684	42.8581	0.0437899	0.704497	0.383051	0.250653	136.808
	062_23CR06A	999		0.176951	0.0382331	0.00124797	0.368597	68.1391	911.017	9.18648	56.3272	1.72004	4.14554	11.2612		062_23CR06A	999		2.08304	0.0271914	683.632	8.23193			0.835218		062_23CR06A	999		0.00304702	2.21465e-05	0.00146277	1.76139e-05			0.156675		062_23CR06A	999		0.176962	0.57281	0.0382331	135.823	0.039067	0.968022	0.368622	0.312546	120.97
	064_23CR06A	999		0.160705	0.0543538	0.00281454	0.365504	63.7823	870.367	7.96659	57.0695	1.7056	2.89155	5.96533		064_23CR06A	999		2.27438	0.0259498	695.452	7.39297			0.817114		064_23CR06A	999		0.00327037	2.19313e-05	0.00143791	1.52857e-05			0.194974		064_23CR06A	999		0.16072	0.497629	0.0543538	103.151	0.0375336	0.785717	0.36554	0.278492	111.763
	065_23CR06A	999		0.16464	0.0565687	0.00165923	0.367337	59.3257	818.011	7.92857	54.6877	1.71416	2.79227	5.85485		065_23CR06A	999		2.23115	0.0242605	658.896	6.2253			0.732523		065_23CR06A	999		0.0033862	2.55629e-05	0.00151769	1.43393e-05			0.196442		065_23CR06A	999		0.164656	0.433602	0.0565687	104.84	0.0371423	0.715461	0.367375	0.327576	108.481
	066_23CR06A	999		0.134616	0.0266232	0.00161349	0.358573	51.8627	747.793	7.41588	56.3394	1.67326	5.79142	25.9683		066_23CR06A	999		2.66366	0.0318043	683.823	7.59494			0.823883		066_23CR06A	999		0.00389525	2.68195e-05	0.00146237	1.62419e-05			0.184362		066_23CR06A	999		0.134624	0.522471	0.0266232	224.196	0.031331	0.668168	0.358591	0.288331	92.0541
	067_23CR06A	999		0.126952	0.0400327	0.00144996	0.347735	46.7062	703.455	8.21496	55.2023	1.62269	3.7351	8.45511		067_23CR06A	999		2.73911	0.0395312	666.466	9.25213			0.889573		067_23CR06A	999		0.00410991	2.74322e-05	0.00150045	2.08299e-05			0.156409		067_23CR06A	999		0.126963	0.667384	0.0400327	113.184	0.0295914	1.09067	0.347762	0.273964	84.6091
	069_23CR06A	999		0.119011	0.124474	0.00159707	0.342217	44.4142	683.641	6.86964	55.555	1.59694	1.18221	0.795866		069_23CR06A	999		2.87552	0.0344835	671.754	8.17062			0.915839		069_23CR06A	999		0.00428061	2.12228e-05	0.00148864	1.81065e-05			0.238058		069_23CR06A	999		0.119044	0.577658	0.124474	33.6598	0.0281748	1.28042	0.342301	0.159631	79.9463
	070_23CR06A	999		0.117462	0.103409	0.00143328	0.339554	42.058	657.428	7.83603	54.5303	1.58451	1.41195	1.45035		070_23CR06A	999		2.89075	0.0408692	656.616	8.77391			0.868924		070_23CR06A	999		0.0044025	3.11696e-05	0.00152296	2.03503e-05			0.1522		070_23CR06A	999		0.11749	0.640347	0.103409	51.359	0.0276869	1.15258	0.339624	0.298614	77.1278
	071_23CR06A	999		0.114276	0.0941488	0.00152477	0.337704	38.6378	614.8	7.69611	53.1059	1.57588	1.54238	1.91049		071_23CR06A	999		2.95518	0.0416871	636.671	8.7186			0.893586		071_23CR06A	999		0.00464161	2.98232e-05	0.00157067	2.15088e-05			0.169443		071_23CR06A	999		0.114301	0.656636	0.0941488	61.9329	0.0271553	1.0992	0.337768	0.256469	72.7562
	072_23CR06A	999		0.10337	0.0847192	0.000598283	0.332422	35.5566	580.473	7.03771	53.5337	1.55123	1.68724	2.09926		072_23CR06A	999		3.21584	0.0424501	642.533	7.43123			0.778588		072_23CR06A	999		0.00500494	4.19574e-05	0.00155634	1.79999e-05			0.15363		072_23CR06A	999		0.103393	0.544843	0.0847192	62.2089	0.0241092	0.974435	0.332479	0.371881	66.4191
	074_23CR06A	999		0.0952586	0.0799539	0.00110055	0.322679	33.0978	559.942	7.48557	53.7839	1.50576	1.7354	2.25484		074_23CR06A	999		3.3874	0.0514828	646.012	8.88708			0.83297		074_23CR06A	999		0.00524355	4.44693e-05	0.00154796	2.1295e-05			0.129361		074_23CR06A	999		0.0952802	0.659537	0.0799539	64.9649	0.0229644	0.986708	0.322732	0.376714	61.5385
	075_23CR06A	999		0.0986335	0.0673054	0.000298627	0.330045	31.9421	532.502	7.98746	52.0311	1.54014	2.10859	2.80152		075_23CR06A	999		3.34617	0.0557974	622.406	10.2831			0.935945		075_23CR06A	999		0.00537619	3.19499e-05	0.00160667	2.65446e-05			0.153908		075_23CR06A	999		0.0986514	0.80265	0.0673054	66.4309	0.0228879	0.912654	0.33009	0.22454	61.3904
	076_23CR06A	999		0.106169	0.0894742	0.00113681	0.326273	30.2492	512.969	7.16757	48.8307	1.52254	1.56802	1.92979		076_23CR06A	999		3.07316	0.0405617	583.477	7.44283			0.876848		076_23CR06A	999		0.00526698	3.39973e-05	0.00171386	2.18621e-05			0.183237		076_23CR06A	999		0.106193	0.607219	0.0894742	61.5354	0.0251008	0.766242	0.326334	0.257468	61.9472
	077_23CR06A	999		0.0862431	0.0678069	0.000227781	0.314175	27.1587	482.478	6.72892	51.3323	1.46608	1.99236	3.73092		077_23CR06A	999		3.64291	0.0519655	613.469	7.96952			0.825645		077_23CR06A	999		0.0059382	4.83311e-05	0.00163007	2.11761e-05			0.14906		077_23CR06A	999		0.0862611	0.618037	0.0678069	93.6303	0.0202893	1.28673	0.314221	0.354944	52.9077
	085_23CR06A	999		0.0862732	0.0202652	0.0014427	0.302314	25.374	470.111	11.1694	49.6245	1.41073	6.4147	42.5205		085_23CR06A	999		3.50415	0.0821893	592.672	13.75			0.918542		085_23CR06A	999		0.00591246	5.5689e-05	0.00168727	3.91447e-05			0.175786		085_23CR06A	999		0.0862793	1.11757	0.0202652	331.43	0.0213662	1.03399	0.302328	0.354294	51.132
	086_23CR06A	999		0.0874757	0.0961826	0.000501402	0.318426	25.9618	458.213	8.82517	49.851	1.48592	1.42358	2.03764		086_23CR06A	999		3.64017	0.0645744	595.349	10.8323			0.909095		086_23CR06A	999		0.00611435	4.69212e-05	0.00167969	3.05617e-05			0.269493		086_23CR06A	999		0.0875013	0.855979	0.0961826	71.5673	0.0208467	1.10854	0.318491	0.230043	52.0788
	087_23CR06A	999		0.0883101	0.0444703	0.000827516	0.315727	23.5432	423.259	8.88568	47.1719	1.47333	3.05289	10.8125		087_23CR06A	999		3.57521	0.0619667	565.156	9.91652			0.881421		087_23CR06A	999		0.00632606	5.37421e-05	0.00176942	3.10472e-05			0.267141		087_23CR06A	999		0.0883222	0.818174	0.0444703	177.086	0.0212974	1.34776	0.315757	0.283862	49.9093
	088_23CR06A	999		0.0784095	0.0549588	0.000507636	0.316335	22.0378	398.248	8.7694	48.4901	1.47616	2.47502	6.044		088_23CR06A	999		4.0344	0.0765929	579.621	11.197			0.893819		088_23CR06A	999		0.00696041	6.14703e-05	0.00172527	3.33284e-05			0.265947		088_23CR06A	999		0.0784243	0.904819	0.0549588	122.1	0.0191187	1.46554	0.316372	0.28519	45.448
	090_23CR06A	999		0.0727675	0.133347	0.000590151	0.304407	21.0701	395.938	10.1583	49.2339	1.4205	0.981614	0.97702		090_23CR06A	999		4.18328	0.1001	588.113	13.855			0.896408		090_23CR06A	999		0.00711306	7.69165e-05	0.00170035	4.00575e-05			0.195001		090_23CR06A	999		0.072803	1.12316	0.133347	49.7643	0.0179932	1.21779	0.304497	0.409661	42.7958
	091_23CR06A	999		0.0922463	-0.0100388	0.000342531	0.316509	20.5795	374.224	8.82747	42.7663	1.47697	-13.5573	163.112		091_23CR06A	999		3.43112	0.0551544	521.653	8.68526			0.880059		091_23CR06A	999		0.00657741	5.28373e-05	0.00191698	3.19168e-05			0.311557		091_23CR06A	999		0.0922438	0.767185	-0.0100388	601.566	0.0215639	1.47014	0.316502	0.238728	48.1208
	092_23CR06A	999		0.0737156	0.0219421	0.000367225	0.318507	19.3537	351.933	8.94141	46.7904	1.48629	6.24179	39.1995		092_23CR06A	999		4.32075	0.088871	561.105	11.8045			0.90306		092_23CR06A	999		0.00770042	7.06241e-05	0.0017822	3.74939e-05			0.268603		092_23CR06A	999		0.0737216	0.988009	0.0219421	314.008	0.0181197	1.40795	0.318521	0.28373	41.3625
	093_23CR06A	999		0.0652325	0.13143	0.000726159	0.308699	17.5089	330.492	9.973	47.3406	1.44053	1.00998	1.12257		093_23CR06A	999		4.7323	0.121712	566.968	14.8093			0.924286		093_23CR06A	999		0.00834667	8.42517e-05	0.00176377	4.60699e-05			0.232618		093_23CR06A	999		0.0652675	1.24491	0.13143	55.5731	0.0167608	1.48024	0.308788	0.317936	36.985
	095_23CR06A	999		0.0613276	0.0062602	0.000107438	0.294297	15.5041	308.846	9.88457	45.8507	1.37332	20.2146	434.29		095_23CR06A	999		4.79876	0.120214	551.368	14.3127			0.926882		095_23CR06A	999		0.00870337	8.52394e-05	0.00181367	4.70802e-05			0.279683		095_23CR06A	999		0.0613294	1.22716	0.0062602	1074.2	0.0152316	1.74441	0.294301	0.248591	33.8144
	096_23CR06A	999		0.0607405	0.0168494	0.000451309	0.293538	14.5471	291.914	9.60663	44.511	1.36978	7.49117	57.3094		096_23CR06A	999		4.83266	0.116945	538.055	13.284			0.894505		096_23CR06A	999		0.00898171	0.000100937	0.00185854	4.58853e-05			0.270754		096_23CR06A	999		0.0607452	1.15545	0.0168494	382.513	0.0154556	1.48585	0.293549	0.357354	32.682
	097_23CR06A	999		0.0706836	-0.00650833	0.000251201	0.28999	13.79	280.969	9.30661	39.5202	1.35322	-19.1594	411.5		097_23CR06A	999		4.10264	0.0791385	493.655	10.0412			0.883623		097_23CR06A	999		0.00831075	7.98992e-05	0.00202571	4.12039e-05			0.34281		097_23CR06A	999		0.070682	0.930648	-0.00650833	1073.89	0.0170868	1.48436	0.289985	0.251427	34.8935
	098_23CR06A	999		0.0574213	0.0182801	0.000364099	0.284595	13.5679	281.631	9.98564	44.1781	1.32805	6.69449	50.5661		098_23CR06A	999		4.95627	0.127087	534.847	14.2611			0.918756		098_23CR06A	999		0.0092667	9.81302e-05	0.00186969	4.98532e-05			0.293258		098_23CR06A	999		0.0574263	1.25264	0.0182801	377.669	0.0146345	1.18361	0.284608	0.270304	30.7118
	100_23CR06A	999		0.056826	-0.0145317	0.000574453	0.282014	12.9632	272.256	9.97862	43.3126	1.316	-8.34494	75.3324		100_23CR06A	999		4.96276	0.126	526.681	14.018			0.920483		100_23CR06A	999		0.00942271	9.83633e-05	0.00189868	5.05349e-05			0.310906		100_23CR06A	999		0.0568225	1.24672	-0.0145317	451.366	0.0147013	1.74635	0.282004	0.237134	29.9294
	101_23CR06A	999		0.0528341	-0.00688442	2.81767e-05	0.281067	11.8533	251.256	10.3302	42.9037	1.31158	-17.5554	330.324		101_23CR06A	999		5.31981	0.151175	522.91	15.2553			0.906382		101_23CR06A	999		0.0101735	0.000126985	0.00191238	5.57914e-05			0.273751		101_23CR06A	999		0.0528323	1.37028	-0.00688442	940.804	0.0133911	1.67823	0.281062	0.374229	27.6277
	102_23CR06A	999		0.0500621	-0.0476449	0.000435989	0.273362	10.8759	237.92	10.2063	42.1177	1.27563	-2.46712	7.57519		102_23CR06A	999		5.46047	0.154295	515.809	15.0663			0.898995		102_23CR06A	999		0.0105862	0.000137064	0.0019387	5.66277e-05			0.293984		102_23CR06A	999		0.0500497	1.36176	-0.0476449	153.522	0.0131831	1.51262	0.27333	0.3753	25.8227
	103_23CR06A	999		0.0832281	-0.004337	0.000474279	0.278248	11.8077	252.721	11.6751	32.2117	1.29843	-27.5874	929.659		103_23CR06A	999		3.34319	0.0704056	440.431	9.50693			0.888183		103_23CR06A	999		0.00759072	7.66386e-05	0.0022705	4.90099e-05			0.285343		103_23CR06A	999		0.0832272	1.00442	-0.004337	1684.93	0.0195324	1.24583	0.278245	0.314746	36.6565
	105_23CR06A	999		0.0505241	0.00279921	0.000432311	0.27032	10.4988	232.601	9.96737	41.0374	1.26144	41.5252	2162.47		105_23CR06A	999		5.35032	0.142662	506.358	13.9792			0.881727		105_23CR06A	999		0.0105663	0.000139786	0.00197489	5.45213e-05			0.309676		105_23CR06A	999		0.0505251	1.27324	0.00279921	2603.8	0.0132297	2.08937	0.270322	0.393009	25.5835
	106_23CR06A	999		0.0624963	-0.0184263	0.000323815	0.27554	10.4785	228.042	10.303	35.9621	1.28579	-6.43005	50.5226		106_23CR06A	999		4.4089	0.100533	466.226	11.2903			0.898412		106_23CR06A	999		0.00945658	0.000101053	0.00214488	5.1941e-05			0.349106		106_23CR06A	999		0.0624916	1.11332	-0.0184263	392.864	0.0154412	2.09969	0.275528	0.243555	29.1376
	107_23CR06A	999		0.0521574	-0.0510405	0.000191337	0.274348	9.65365	211.952	10.7402	38.2687	1.28023	-2.3113	6.59344		107_23CR06A	999		5.26001	0.150614	483.647	14.513			0.913011		107_23CR06A	999		0.0108757	0.000133808	0.00206762	6.20441e-05			0.314099		107_23CR06A	999		0.052144	1.40031	-0.0510405	142.635	0.0133454	1.62179	0.274314	0.297032	25.226
	108_23CR06A	999		0.0486573	-0.0289239	0.000453829	0.265117	9.59637	217.683	10.5717	39.7798	1.23716	-3.9414	19.7948		108_23CR06A	999		5.44867	0.156542	495.784	15.0404			0.912316		108_23CR06A	999		0.01099	0.000137013	0.00201701	6.11893e-05			0.33092		108_23CR06A	999		0.0486499	1.40959	-0.0289239	251.114	0.0128363	1.81051	0.265098	0.274494	24.1237
	110_23CR06A	999		0.0469938	-0.044847	0.000408158	0.258983	8.6831	202.487	10.3795	38.2283	1.20853	-2.48317	6.93643		110_23CR06A	999		5.511	0.15624	483.331	14.1753			0.866372		110_23CR06A	999		0.0114021	0.000170336	0.00206897	6.06797e-05			0.319049		110_23CR06A	999		0.0469822	1.34185	-0.044847	139.668	0.0124028	1.92039	0.258953	0.456342	22.7138
	111_23CR06A	999	4	0.0499274	-0.0301416	0	0.259959	8.69566	202.043	10.4858	36.8426	1.21309	-3.70858	17.6213		111_23CR06A	999	4	5.20675	0.139448	472.726	13.4397			0.890271		111_23CR06A	999	4	0.0110143	0.000143531	0.00211539	6.01408e-05			0.351981		111_23CR06A	999	4	0.0499194	1.30145	-0.0301416	237.574	0.0124858	1.64234	0.259939	0.313376	23.6022
	112_23CR06A	999	4	0.0472784	0.00606361	0.00013418	0.260208	8.7591	203.253	10.6888	38.2916	1.21425	18.4527	399.266		112_23CR06A	999	4	5.50375	0.159319	483.827	14.9041			0.909017		112_23CR06A	999	4	0.0113755	0.000146435	0.00206686	6.36689e-05			0.348872		112_23CR06A	999	4	0.04728	1.42302	0.00606361	1081.87	0.0121973	1.84294	0.260213	0.261016	22.8748
	113_23CR06A	999	4	0.0497305	-0.0328153	0.000285592	0.256763	8.35997	196.94	11.1829	36.0223	1.19817	-3.36454	13.5076		113_23CR06A	999	4	5.16309	0.149292	466.665	14.193			0.899293		113_23CR06A	999	4	0.0110638	0.000148177	0.00214286	6.51722e-05			0.329304		113_23CR06A	999	4	0.049722	1.40591	-0.0328153	200.735	0.0127692	1.91592	0.256741	0.335876	23.2077
			S	38.3979	10.0746	0.307172	21.4296	14950.6																																S	38.4007	0.0406635	10.0746	5.28168	7.80462	0.055447	21.4364	0.0409036	26414.7
	Information on Analysis				Results		40(r)/39(k)	± 2s	Age	± 2s	MSWD	39Ar(k)	K/Ca	± 2s		Results			40(a)/36(a)	± 2s	40(r)/39(k)	± 2s	Age	± 2s	MSWD		Results			40(a)/36(a)	± 2s	40(r)/39(k)	± 2s	Age	± 2s	MSWD		Information on Analysis and Constants Used in Calculations									Results		40(a)/36(a)
									(Ma)			(%,n)											(Ma)											(Ma)
	Sample = 003_23CR06A				Age Plateau		33.2447	1.08704	200.868	6.22248	0.371862	3.62551	-3.47606	10.7165		Normal Isochron			242.055	179.706	43.9217	33.9882	260.968	188.21	0.462142		Inverse Isochron Clustered Points			242.802	180.8	43.7864	31.8663	260.219	176.532	0.46132		Sample = 003_23CR06A				Age Equations = Min et al. (2000)					Age Plateau
	Material = Quartz							0.0326981		0.0309779	0.689449	3								0.742419		0.773836		0.7212	0.496624						0.744639		0.727766		0.6784	0.497008		Material = Quartz				Negative Intensities = Allowed
	Location = R6 Rursee				Full External Error					7.4159	3	2σ Confidence Limit				Full External Error								188.281			Full External Error								176.608			Location = R6 Rursee				Decay Constant 40K = 5.460 ± 0.053 E-10 1/a					Full External Error
	Analyst = Klaudia Kuiper				Analytical Error					6.22042	1	Error Magnification				Analytical Error								188.21			Analytical Error								176.532			Analyst = Klaudia Kuiper				Decay Constant 39Ar = 2.940 ± 0.016 E-07 1/h					Analytical Error
	Project = VU123																																					Project = VU123				Decay Constant 37Ar = 8.230 ± 0.012 E-04 1/h
	Mass Discrimination Law = LIN				Total Fusion Age		697.66	1.09801	2258.22	2.31446		75	0.91465	0.0966206																								Mass Discrimination Law = LIN				Decay Constant 36Cl = 2.257 ± 0.015 E-06 1/a					Total Fusion Age
	Irradiation = VU123							0.00157385		0.00102491						Statistics			2σ Confidence Limit	3.82843		Convergence	0.000386463				Statistics			2σ Confidence Limit	3.82843		Convergence	4.02183e-05				Irradiation = VU123				Decay Activity 40K(EC,β⁺) = 3.310 ± 0.030 1/gs
	J = 0.00348680 ± 0.00000146				Full External Error					32.7478									Error Magnification	1		Number of Iterations	14							Error Magnification	1		Number of Iterations	5				J = 0.00348680 ± 0.00000146				Decay Activity 40K(β⁻) = 27.890 ± 0.150 1/gs					Full External Error
	DRA = 25.522 ± 0.079 Ma				Analytical Error					2.04184									Number of Data Points	3		Calculated Line	Weighted York-2							Number of Data Points	3		Calculated Line	Weighted York-2				DRA = 25.522 ± 0.079 Ma				Atmospheric Ratio 40/36(a) = 298.56 ± 0.31					Analytical Error
																														Spreading Factor	0.0159038							IGSN = Undefined				Atmospheric Ratio 38/36(a) = 0.1885 ± 0.0003
																																						Preferred Age = Undefined				Production Ratio 39/37(ca) = 0.000673 ± 0.000004					Normal Isochron		242.055
																																						Classification = Undefined				Production Ratio 36/37(ca) = 0.000264 ± 0.000002
																																						Experiment Type = Undefined				Production Ratio 40/39(k) = 0.000860 ± 0.000070					Full External Error
																																						Extraction Method = Undefined				Production Ratio 38/39(k) = 0.012110 ± 0.000030					Analytical Error
																																						Heating = 180 sec				Production Ratio 36/38(cl) = 262.80 ± 1.71
																																						Isolation = 5.00 min				Scaling Ratio K/Ca = 0.430
																																						Instrument = HELIX				Abundance Ratio 40K/K = 1.1700 ± 0.0100 E-04
																																						Lithology = Undefined				Atomic Weight K = 39.0983 ± 0.0001 g					Inverse Isochron Clustered Points		242.802
																																						Lat-Lon = Undefined - Undefined
																																						Feature = Undefined									Full External Error
																																															Analytical Error
[truncated: 150 more columns]
