# Supplementary material for: 40 Ar ∕ 39 Ar age constraints on the formation of fluid-rich quartz veins from the NW Rhenohercynian zone (Rursee area, Germany)
Source: Copernicus journal article supplement (doi:10.5194/gchron-7-173-2025), 2025-05-15
Supplement: Supplementary file 1 [file gchron-7-173-2025-supplement.zip]

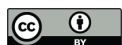

## *Supplement of*

# **$^{40}\text{Ar} / ^{39}\text{Ar}$ age constraints on the formation of fluid-rich quartz veins from the NW Rhenohercynian zone (Rursee area, Germany)**

**Akbar Aydin Oglu Huseynov et al.**

*Correspondence to:* Akbar Aydin Oglu Huseynov (a.huseynov@vu.nl)

- gchron-7-173-2025-supplement-title-page.pdf
- Captions for Supplements.docx
- Supplement S1.xlsx
- Supplement S2.docx
- Supplement S2.xlsx
- Supplement S3.xlsx
- Supplement S4.xlsx

The copyright of individual parts of the supplement might differ from the article licence.
