# Supplementary material for: 40 Ar ∕ 39 Ar age constraints on the formation of fluid-rich quartz veins from the NW Rhenohercynian zone (Rursee area, Germany)
Source: Copernicus journal article supplement (doi:10.5194/gchron-7-173-2025), 2025-05-15
Supplement: Supplementary file 2 [file Captions for Supplements.docx]

**Supplement S1** Impact of blank correction on age.

**Supplement S2** K (and thus 40Ar*) contribution from chlorite is estimated from 2D electron backscattered images.

**Supplement S3** Analytical data used for 40Ar/39Ar dating.

**Supplement S4** Grain size distribution analysis of separated fluid-rich quartz fraction after crushing.
