# Supplementary material for: 40 Ar ∕ 39 Ar age constraints on the formation of fluid-rich quartz veins from the NW Rhenohercynian zone (Rursee area, Germany)
Source: Copernicus journal article supplement (doi:10.5194/gchron-7-173-2025), 2025-05-15
Supplement: Supplementary file 3 [file Supplement S1.xlsx]

## Sheet: Data
We do not really know what our blank is during crushing, because we cannot mimic the movement of the pestle withhout crushing the sample.
We expect that real sample blanks are higher than the line blanks we measure, but we don't know by how much.
The tests we did with an empty sample tube (metal to metal contact), so indeed higher blanks, but wthi atmospheric composition, so 40Ar/36Ar = ~298
Here we artifically increased blank for samples Rursee 1b to check the influence on the finale age.																40	298.54	5		38	0.18	0.00301467									40	298.54	10		38	0.18	0.00602934									40	298.54	20
We tested 4 scenarios																36	1	0.0167482		36	1	0.0167482									36	1	0.0334963		36	1	0.0334963									36	1	0.0669927
															Scenario 1: add 5fA to 40Arblank, 0.0167fA to 36Arblank and , for step 56 and further															Scenario 2: add 10fA to 40Arblank, 0.0167fA to 36Arblank and , for step 56 and further															Scenario 3: add 20fA to 40Arblank, 0.0167fA to 36Arblank and , for step 56 and further
Procedure Blanks		36Ar [fA]	1s	37Ar [fA]	1s	38Ar [fA]	1s	39Ar [fA]	1s	40Ar [fA]	1s				Procedure Blanks		36Ar [fA]	1s	37Ar [fA]	1s	38Ar [fA]	1s	39Ar [fA]	1s	40Ar [fA]	1s				Procedure Blanks		36Ar [fA]	1s	37Ar [fA]	1s	38Ar [fA]	1s	39Ar [fA]	1s	40Ar [fA]	1s				Procedure Blanks		36Ar [fA]	1s	37Ar [fA]
003_23CR01B	1	0.0118631	0.0013032	0.0034383	0.0002792	0.0039833	0.0002793	0.0085632	0.0003039	3.52476	0.328799				003_23CR01B	1	0.0118631	0.0013032	0.0034383	0.0002792	0.0039833	0.0002793	0.0085632	0.0003039	3.52476	0.328799				003_23CR01B	1	0.0118631	0.0013032	0.0034383	0.0002792	0.0039833	0.0002793	0.0085632	0.0003039	3.52476	0.328799				003_23CR01B	1	0.0118631	0.0013032	0.0034383
004_23CR01B	3	0.0118631	0.0013032	0.0034383	0.0002792	0.0039833	0.0002793	0.0085632	0.0003039	3.52476	0.328799				004_23CR01B	3	0.0118631	0.0013032	0.0034383	0.0002792	0.0039833	0.0002793	0.0085632	0.0003039	3.52476	0.328799				004_23CR01B	3	0.0118631	0.0013032	0.0034383	0.0002792	0.0039833	0.0002793	0.0085632	0.0003039	3.52476	0.328799				004_23CR01B	3	0.0118631	0.0013032	0.0034383
005_23CR01B	5	0.0118631	0.0013032	0.0034383	0.0002792	0.0039833	0.0002793	0.0085632	0.0003039	3.52476	0.328799				005_23CR01B	5	0.0118631	0.0013032	0.0034383	0.0002792	0.0039833	0.0002793	0.0085632	0.0003039	3.52476	0.328799				005_23CR01B	5	0.0118631	0.0013032	0.0034383	0.0002792	0.0039833	0.0002793	0.0085632	0.0003039	3.52476	0.328799				005_23CR01B	5	0.0118631	0.0013032	0.0034383
013_23CR01B	7	0.0147654	0.0005368	0.0036156	7.99e-05	0.0048567	8.62e-05	0.0095784	0.0004484	4.92563	0.0817037				013_23CR01B	7	0.0147654	0.0005368	0.0036156	7.99e-05	0.0048567	8.62e-05	0.0095784	0.0004484	4.92563	0.0817037				013_23CR01B	7	0.0147654	0.0005368	0.0036156	7.99e-05	0.0048567	8.62e-05	0.0095784	0.0004484	4.92563	0.0817037				013_23CR01B	7	0.0147654	0.0005368	0.0036156
014_23CR01B	9	0.0148626	0.0005376	0.0036402	7.99e-05	0.0048778	8.62e-05	0.0097089	0.0004484	4.89443	0.0816978				014_23CR01B	9	0.0148626	0.0005376	0.0036402	7.99e-05	0.0048778	8.62e-05	0.0097089	0.0004484	4.89443	0.0816978				014_23CR01B	9	0.0148626	0.0005376	0.0036402	7.99e-05	0.0048778	8.62e-05	0.0097089	0.0004484	4.89443	0.0816978				014_23CR01B	9	0.0148626	0.0005376	0.0036402
015_23CR01B	11	0.0149628	0.0005385	0.0036614	7.99e-05	0.0048985	8.62e-05	0.0098463	0.0004484	4.86842	0.0816929				015_23CR01B	11	0.0149628	0.0005385	0.0036614	7.99e-05	0.0048985	8.62e-05	0.0098463	0.0004484	4.86842	0.0816929				015_23CR01B	11	0.0149628	0.0005385	0.0036614	7.99e-05	0.0048985	8.62e-05	0.0098463	0.0004484	4.86842	0.0816929				015_23CR01B	11	0.0149628	0.0005385	0.0036614
016_23CR01B	13	0.0150579	0.0005393	0.0036795	7.99e-05	0.0049182	8.62e-05	0.0099871	0.0004484	4.84509	0.0816886				016_23CR01B	13	0.0150579	0.0005393	0.0036795	7.99e-05	0.0049182	8.62e-05	0.0099871	0.0004484	4.84509	0.0816886				016_23CR01B	13	0.0150579	0.0005393	0.0036795	7.99e-05	0.0049182	8.62e-05	0.0099871	0.0004484	4.84509	0.0816886				016_23CR01B	13	0.0150579	0.0005393	0.0036795
018_23CR01B	17	0.0152017	0.0005404	0.0037064	7.99e-05	0.00495	8.62e-05	0.0102587	0.0004485	4.79931	0.0816802				018_23CR01B	17	0.0152017	0.0005404	0.0037064	7.99e-05	0.00495	8.62e-05	0.0102587	0.0004485	4.79931	0.0816802				018_23CR01B	17	0.0152017	0.0005404	0.0037064	7.99e-05	0.00495	8.62e-05	0.0102587	0.0004485	4.79931	0.0816802				018_23CR01B	17	0.0152017	0.0005404	0.0037064
019_23CR01B	21	0.015243	0.0005408	0.0037161	7.99e-05	0.0049616	8.62e-05	0.0103889	0.0004485	4.77279	0.0816753				019_23CR01B	21	0.015243	0.0005408	0.0037161	7.99e-05	0.0049616	8.62e-05	0.0103889	0.0004485	4.77279	0.0816753				019_23CR01B	21	0.015243	0.0005408	0.0037161	7.99e-05	0.0049616	8.62e-05	0.0103889	0.0004485	4.77279	0.0816753				019_23CR01B	21	0.015243	0.0005408	0.0037161
020_23CR01B	25	0.0152584	0.0005409	0.0037239	7.99e-05	0.0049699	8.62e-05	0.0105163	0.0004485	4.74102	0.0816695				020_23CR01B	25	0.0152584	0.0005409	0.0037239	7.99e-05	0.0049699	8.62e-05	0.0105163	0.0004485	4.74102	0.0816695				020_23CR01B	25	0.0152584	0.0005409	0.0037239	7.99e-05	0.0049699	8.62e-05	0.0105163	0.0004485	4.74102	0.0816695				020_23CR01B	25	0.0152584	0.0005409	0.0037239
021_23CR01B	30	0.015243	0.0005408	0.0037296	7.99e-05	0.004974	8.62e-05	0.0106349	0.0004485	4.70364	0.0816628				021_23CR01B	30	0.015243	0.0005408	0.0037296	7.99e-05	0.004974	8.62e-05	0.0106349	0.0004485	4.70364	0.0816628				021_23CR01B	30	0.015243	0.0005408	0.0037296	7.99e-05	0.004974	8.62e-05	0.0106349	0.0004485	4.70364	0.0816628				021_23CR01B	30	0.015243	0.0005408	0.0037296
023_23CR01B	35	0.0151176	0.0005397	0.0037353	7.99e-05	0.0049692	8.62e-05	0.0108341	0.0004485	4.6122	0.0816465				023_23CR01B	35	0.0151176	0.0005397	0.0037353	7.99e-05	0.0049692	8.62e-05	0.0108341	0.0004485	4.6122	0.0816465				023_23CR01B	35	0.0151176	0.0005397	0.0037353	7.99e-05	0.0049692	8.62e-05	0.0108341	0.0004485	4.6122	0.0816465				023_23CR01B	35	0.0151176	0.0005397	0.0037353
024_23CR01B	40	0.0150021	0.0005388	0.003736	7.99e-05	0.0049598	8.62e-05	0.0109188	0.0004485	4.55447	0.0816363				024_23CR01B	40	0.0150021	0.0005388	0.003736	7.99e-05	0.0049598	8.62e-05	0.0109188	0.0004485	4.55447	0.0816363				024_23CR01B	40	0.0150021	0.0005388	0.003736	7.99e-05	0.0049598	8.62e-05	0.0109188	0.0004485	4.55447	0.0816363				024_23CR01B	40	0.0150021	0.0005388	0.003736
025_23CR01B	50	0.0148573	0.0005376	0.0037355	7.99e-05	0.0049462	8.62e-05	0.0109884	0.0004485	4.49151	0.0816254				025_23CR01B	50	0.0148573	0.0005376	0.0037355	7.99e-05	0.0049462	8.62e-05	0.0109884	0.0004485	4.49151	0.0816254				025_23CR01B	50	0.0148573	0.0005376	0.0037355	7.99e-05	0.0049462	8.62e-05	0.0109884	0.0004485	4.49151	0.0816254				025_23CR01B	50	0.0148573	0.0005376	0.0037355
026_23CR01B	60	0.0146759	0.0005361	0.0037339	7.99e-05	0.0049275	8.62e-05	0.0110469	0.0004485	4.41963	0.0816131				026_23CR01B	60	0.0146759	0.0005361	0.0037339	7.99e-05	0.0049275	8.62e-05	0.0110469	0.0004485	4.41963	0.0816131				026_23CR01B	60	0.0146759	0.0005361	0.0037339	7.99e-05	0.0049275	8.62e-05	0.0110469	0.0004485	4.41963	0.0816131				026_23CR01B	60	0.0146759	0.0005361	0.0037339
028_23CR01B	70	0.0142415	0.0005325	0.0037289	7.99e-05	0.0048789	8.62e-05	0.0111221	0.0004485	4.26245	0.081587				028_23CR01B	70	0.0142415	0.0005325	0.0037289	7.99e-05	0.0048789	8.62e-05	0.0111221	0.0004485	4.26245	0.081587				028_23CR01B	70	0.0142415	0.0005325	0.0037289	7.99e-05	0.0048789	8.62e-05	0.0111221	0.0004485	4.26245	0.081587				028_23CR01B	70	0.0142415	0.0005325	0.0037289
029_23CR01B	80	0.0139826	0.0005304	0.0037257	7.99e-05	0.004848	8.62e-05	0.011142	0.0004485	4.1741	0.0815727				029_23CR01B	80	0.0139826	0.0005304	0.0037257	7.99e-05	0.004848	8.62e-05	0.011142	0.0004485	4.1741	0.0815727				029_23CR01B	80	0.0139826	0.0005304	0.0037257	7.99e-05	0.004848	8.62e-05	0.011142	0.0004485	4.1741	0.0815727				029_23CR01B	80	0.0139826	0.0005304	0.0037257
030_23CR01B	90	0.0137068	0.0005281	0.0037224	7.99e-05	0.0048138	8.62e-05	0.0111502	0.0004485	4.0825	0.0815582				030_23CR01B	90	0.0137068	0.0005281	0.0037224	7.99e-05	0.0048138	8.62e-05	0.0111502	0.0004485	4.0825	0.0815582				030_23CR01B	90	0.0137068	0.0005281	0.0037224	7.99e-05	0.0048138	8.62e-05	0.0111502	0.0004485	4.0825	0.0815582				030_23CR01B	90	0.0137068	0.0005281	0.0037224
031_23CR01B	100	0.0134207	0.0005256	0.0037192	7.99e-05	0.0047769	8.62e-05	0.0111479	0.0004485	3.98932	0.0815438				031_23CR01B	100	0.0134207	0.0005256	0.0037192	7.99e-05	0.0047769	8.62e-05	0.0111479	0.0004485	3.98932	0.0815438				031_23CR01B	100	0.0134207	0.0005256	0.0037192	7.99e-05	0.0047769	8.62e-05	0.0111479	0.0004485	3.98932	0.0815438				031_23CR01B	100	0.0134207	0.0005256	0.0037192
033_23CR01B	120	0.0128646	0.0005209	0.0037145	7.99e-05	0.0047003	8.62e-05	0.0111196	0.0004485	3.81168	0.0815172				033_23CR01B	120	0.0128646	0.0005209	0.0037145	7.99e-05	0.0047003	8.62e-05	0.0111196	0.0004485	3.81168	0.0815172				033_23CR01B	120	0.0128646	0.0005209	0.0037145	7.99e-05	0.0047003	8.62e-05	0.0111196	0.0004485	3.81168	0.0815172				033_23CR01B	120	0.0128646	0.0005209	0.0037145
034_23CR01B	140	0.0126024	0.0005187	0.0037132	7.99e-05	0.004661	8.62e-05	0.0110973	0.0004485	3.72872	0.0815052				034_23CR01B	140	0.0126024	0.0005187	0.0037132	7.99e-05	0.004661	8.62e-05	0.0110973	0.0004485	3.72872	0.0815052				034_23CR01B	140	0.0126024	0.0005187	0.0037132	7.99e-05	0.004661	8.62e-05	0.0110973	0.0004485	3.72872	0.0815052				034_23CR01B	140	0.0126024	0.0005187	0.0037132
035_23CR01B	180	0.0123559	0.0005166	0.0037131	7.99e-05	0.004621	8.62e-05	0.0110718	0.0004485	3.65076	0.0814942				035_23CR01B	180	0.0123559	0.0005166	0.0037131	7.99e-05	0.004621	8.62e-05	0.0110718	0.0004485	3.65076	0.0814942				035_23CR01B	180	0.0123559	0.0005166	0.0037131	7.99e-05	0.004621	8.62e-05	0.0110718	0.0004485	3.65076	0.0814942				035_23CR01B	180	0.0123559	0.0005166	0.0037131
036_23CR01B	230	0.0121451	0.0005148	0.0037144	7.99e-05	0.0045827	8.62e-05	0.0110463	0.0004485	3.58353	0.0814849				036_23CR01B	230	0.0121451	0.0005148	0.0037144	7.99e-05	0.0045827	8.62e-05	0.0110463	0.0004485	3.58353	0.0814849				036_23CR01B	230	0.0121451	0.0005148	0.0037144	7.99e-05	0.0045827	8.62e-05	0.0110463	0.0004485	3.58353	0.0814849				036_23CR01B	230	0.0121451	0.0005148	0.0037144
038_23CR01B	290	0.0118844	0.0005126	0.0037218	7.99e-05	0.0045177	8.62e-05	0.0110092	0.0004485	3.49652	0.0814731				038_23CR01B	290	0.0118844	0.0005126	0.0037218	7.99e-05	0.0045177	8.62e-05	0.0110092	0.0004485	3.49652	0.0814731				038_23CR01B	290	0.0118844	0.0005126	0.0037218	7.99e-05	0.0045177	8.62e-05	0.0110092	0.0004485	3.49652	0.0814731				038_23CR01B	290	0.0118844	0.0005126	0.0037218
039_23CR01B	370	0.0118529	0.0005123	0.0037287	7.99e-05	0.0044915	8.62e-05	0.0110033	0.0004485	3.48129	0.081471				039_23CR01B	370	0.0118529	0.0005123	0.0037287	7.99e-05	0.0044915	8.62e-05	0.0110033	0.0004485	3.48129	0.081471				039_23CR01B	370	0.0118529	0.0005123	0.0037287	7.99e-05	0.0044915	8.62e-05	0.0110033	0.0004485	3.48129	0.081471				039_23CR01B	370	0.0118529	0.0005123	0.0037287
040_23CR01B	470	0.0119111	0.0005128	0.0037381	7.99e-05	0.0044723	8.62e-05	0.0110115	0.0004485	3.49164	0.0814724				040_23CR01B	470	0.0119111	0.0005128	0.0037381	7.99e-05	0.0044723	8.62e-05	0.0110115	0.0004485	3.49164	0.0814724				040_23CR01B	470	0.0119111	0.0005128	0.0037381	7.99e-05	0.0044723	8.62e-05	0.0110115	0.0004485	3.49164	0.0814724				040_23CR01B	470	0.0119111	0.0005128	0.0037381
041_23CR01B	590	0.0120685	0.0005141	0.0037499	7.99e-05	0.0044617	8.62e-05	0.0110371	0.0004485	3.53031	0.0814776				041_23CR01B	590	0.0120685	0.0005141	0.0037499	7.99e-05	0.0044617	8.62e-05	0.0110371	0.0004485	3.53031	0.0814776				041_23CR01B	590	0.0120685	0.0005141	0.0037499	7.99e-05	0.0044617	8.62e-05	0.0110371	0.0004485	3.53031	0.0814776				041_23CR01B	590	0.0120685	0.0005141	0.0037499
049_23CR01B	750	0.0110931	0.0010111	0.0035197	8.04e-05	0.004083	9.42e-05	0.0100071	0.0001723	3.14647	0.285773				049_23CR01B	750	0.0110931	0.0010111	0.0035197	8.04e-05	0.004083	9.42e-05	0.0100071	0.0001723	3.14647	0.285773				049_23CR01B	750	0.0110931	0.0010111	0.0035197	8.04e-05	0.004083	9.42e-05	0.0100071	0.0001723	3.14647	0.285773				049_23CR01B	750	0.0110931	0.0010111	0.0035197
050_23CR01B	300	0.0114245	0.0010125	0.0035443	8.04e-05	0.0041399	9.42e-05	0.0105026	0.0001724	3.27461	0.285778				050_23CR01B	300	0.0114245	0.0010125	0.0035443	8.04e-05	0.0041399	9.42e-05	0.0105026	0.0001724	3.27461	0.285778				050_23CR01B	300	0.0114245	0.0010125	0.0035443	8.04e-05	0.0041399	9.42e-05	0.0105026	0.0001724	3.27461	0.285778				050_23CR01B	300	0.0114245	0.0010125	0.0035443
051_23CR01B	500	0.0116587	0.0010136	0.0035638	8.04e-05	0.0041819	9.42e-05	0.0109036	0.0001724	3.3627	0.285781				051_23CR01B	500	0.0116587	0.0010136	0.0035638	8.04e-05	0.0041819	9.42e-05	0.0109036	0.0001724	3.3627	0.285781				051_23CR01B	500	0.0116587	0.0010136	0.0035638	8.04e-05	0.0041819	9.42e-05	0.0109036	0.0001724	3.3627	0.285781				051_23CR01B	500	0.0116587	0.0010136	0.0035638
052_23CR01B	700	0.0118114	0.0010142	0.003579	8.04e-05	0.0042113	9.42e-05	0.0112208	0.0001724	3.41731	0.285783				052_23CR01B	700	0.0118114	0.0010142	0.003579	8.04e-05	0.0042113	9.42e-05	0.0112208	0.0001724	3.41731	0.285783				052_23CR01B	700	0.0118114	0.0010142	0.003579	8.04e-05	0.0042113	9.42e-05	0.0112208	0.0001724	3.41731	0.285783				052_23CR01B	700	0.0118114	0.0010142	0.003579
054_23CR01B	900	0.0119269	0.0010147	0.0035981	8.04e-05	0.0042392	9.42e-05	0.0116345	0.0001725	3.44979	0.285784				054_23CR01B	900	0.0119269	0.0010147	0.0035981	8.04e-05	0.0042392	9.42e-05	0.0116345	0.0001725	3.44979	0.285784				054_23CR01B	900	0.0119269	0.0010147	0.0035981	8.04e-05	0.0042392	9.42e-05	0.0116345	0.0001725	3.44979	0.285784				054_23CR01B	900	0.0119269	0.0010147	0.0035981
055_23CR01B	700	0.0119181	0.0010147	0.0036036	8.04e-05	0.0042421	9.42e-05	0.0117588	0.0001725	3.43933	0.285784				055_23CR01B	700	0.0119181	0.0010147	0.0036036	8.04e-05	0.0042421	9.42e-05	0.0117588	0.0001725	3.43933	0.285784				055_23CR01B	700	0.0119181	0.0010147	0.0036036	8.04e-05	0.0042421	9.42e-05	0.0117588	0.0001725	3.43933	0.285784				055_23CR01B	700	0.0119181	0.0010147	0.0036036
056_23CR01B	999	0.0118763	0.0010145	0.0036069	8.04e-05	0.0042392	9.42e-05	0.0118406	0.0001725	3.41578	0.285783				056_23CR01B	999	0.0286245	0.0010145	0.0036069	8.04e-05	0.00725387	9.42e-05	0.0118406	0.0001725	8.41578	0.285783				056_23CR01B	999	0.0453726	0.0010145	0.0036069	8.04e-05	0.0102685	9.42e-05	0.0118406	0.0001725	13.4158	0.285783				056_23CR01B	999	0.078869	0.0010145	0.0036069
057_23CR01B	999	0.0118105	0.0010142	0.0036083	8.04e-05	0.0042318	9.42e-05	0.0118832	0.0001725	3.38319	0.285782				057_23CR01B	999	0.0285587	0.0010142	0.0036083	8.04e-05	0.00724647	9.42e-05	0.0118832	0.0001725	8.38319	0.285782				057_23CR01B	999	0.0453068	0.0010142	0.0036083	8.04e-05	0.0102611	9.42e-05	0.0118832	0.0001725	13.3832	0.285782				057_23CR01B	999	0.0788032	0.0010142	0.0036083
059_23CR01B	999	0.0116431	0.0010135	0.0036067	8.04e-05	0.0042086	9.42e-05	0.0118823	0.0001725	3.30648	0.285779				059_23CR01B	999	0.0283913	0.0010135	0.0036067	8.04e-05	0.00722327	9.42e-05	0.0118823	0.0001725	8.30648	0.285779				059_23CR01B	999	0.0451394	0.0010135	0.0036067	8.04e-05	0.0102379	9.42e-05	0.0118823	0.0001725	13.3065	0.285779				059_23CR01B	999	0.0786358	0.0010135	0.0036067
060_23CR01B	999	0.011548	0.0010131	0.003604	8.04e-05	0.0041939	9.42e-05	0.011852	0.0001725	3.26505	0.285777				060_23CR01B	999	0.0282962	0.0010131	0.003604	8.04e-05	0.00720857	9.42e-05	0.011852	0.0001725	8.26505	0.285777				060_23CR01B	999	0.0450443	0.0010131	0.003604	8.04e-05	0.0102232	9.42e-05	0.011852	0.0001725	13.265	0.285777				060_23CR01B	999	0.0785407	0.0010131	0.003604
061_23CR01B	999	0.0114529	0.0010127	0.0036003	8.04e-05	0.0041784	9.42e-05	0.0118095	0.0001725	3.22494	0.285776				061_23CR01B	999	0.0282011	0.0010127	0.0036003	8.04e-05	0.00719307	9.42e-05	0.0118095	0.0001725	8.22494	0.285776				061_23CR01B	999	0.0449492	0.0010127	0.0036003	8.04e-05	0.0102077	9.42e-05	0.0118095	0.0001725	13.2249	0.285776				061_23CR01B	999	0.0784456	0.0010127	0.0036003
062_23CR01B	999	0.0113635	0.0010123	0.0035958	8.04e-05	0.004163	9.42e-05	0.0117619	0.0001725	3.18857	0.285775				062_23CR01B	999	0.0281117	0.0010123	0.0035958	8.04e-05	0.00717767	9.42e-05	0.0117619	0.0001725	8.18857	0.285775				062_23CR01B	999	0.0448598	0.0010123	0.0035958	8.04e-05	0.0101923	9.42e-05	0.0117619	0.0001725	13.1886	0.285775				062_23CR01B	999	0.0783562	0.0010123	0.0035958
064_23CR01B	999	0.0111979	0.0010115	0.0035841	8.04e-05	0.0041326	9.42e-05	0.0116662	0.0001725	3.12577	0.285772				064_23CR01B	999	0.0279461	0.0010115	0.0035841	8.04e-05	0.00714727	9.42e-05	0.0116662	0.0001725	8.12577	0.285772				064_23CR01B	999	0.0446942	0.0010115	0.0035841	8.04e-05	0.0101619	9.42e-05	0.0116662	0.0001725	13.1258	0.285772				064_23CR01B	999	0.0781906	0.0010115	0.0035841
065_23CR01B	999	0.0111191	0.0010112	0.0035765	8.04e-05	0.0041175	9.42e-05	0.0116247	0.0001725	3.09863	0.285772				065_23CR01B	999	0.0278673	0.0010112	0.0035765	8.04e-05	0.00713217	9.42e-05	0.0116247	0.0001725	8.09863	0.285772				065_23CR01B	999	0.0446154	0.0010112	0.0035765	8.04e-05	0.0101468	9.42e-05	0.0116247	0.0001725	13.0986	0.285772				065_23CR01B	999	0.0781118	0.0010112	0.0035765
066_23CR01B	999	0.0110426	0.0010109	0.0035677	8.04e-05	0.0041026	9.42e-05	0.0115935	0.0001725	3.07423	0.285771				066_23CR01B	999	0.0277908	0.0010109	0.0035677	8.04e-05	0.00711727	9.42e-05	0.0115935	0.0001725	8.07423	0.285771				066_23CR01B	999	0.0445389	0.0010109	0.0035677	8.04e-05	0.0101319	9.42e-05	0.0115935	0.0001725	13.0742	0.285771				066_23CR01B	999	0.0780353	0.0010109	0.0035677
067_23CR01B	999	0.0109649	0.0010105	0.0035575	8.04e-05	0.0040877	9.42e-05	0.0115757	0.0001725	3.05129	0.28577				067_23CR01B	999	0.0277131	0.0010105	0.0035575	8.04e-05	0.00710237	9.42e-05	0.0115757	0.0001725	8.05129	0.28577				067_23CR01B	999	0.0444612	0.0010105	0.0035575	8.04e-05	0.010117	9.42e-05	0.0115757	0.0001725	13.0513	0.28577				067_23CR01B	999	0.0779576	0.0010105	0.0035575
069_23CR01B	999	0.010793	0.0010098	0.0035325	8.04e-05	0.0040572	9.42e-05	0.0115881	0.0001725	3.00378	0.285768				069_23CR01B	999	0.0275412	0.0010098	0.0035325	8.04e-05	0.00707187	9.42e-05	0.0115881	0.0001725	8.00378	0.285768				069_23CR01B	999	0.0442893	0.0010098	0.0035325	8.04e-05	0.0100865	9.42e-05	0.0115881	0.0001725	13.0038	0.285768				069_23CR01B	999	0.0777857	0.0010098	0.0035325
070_23CR01B	999	0.0106809	0.0010093	0.0035163	8.04e-05	0.0040394	9.42e-05	0.0116221	0.0001725	2.97273	0.285767				070_23CR01B	999	0.0274291	0.0010093	0.0035163	8.04e-05	0.00705407	9.42e-05	0.0116221	0.0001725	7.97273	0.285767				070_23CR01B	999	0.0441772	0.0010093	0.0035163	8.04e-05	0.0100687	9.42e-05	0.0116221	0.0001725	12.9727	0.285767				070_23CR01B	999	0.0776736	0.0010093	0.0035163
071_23CR01B	999	0.010547	0.0010087	0.0034978	8.04e-05	0.0040198	9.42e-05	0.0116746	0.0001725	2.93433	0.285766				071_23CR01B	999	0.0272952	0.0010087	0.0034978	8.04e-05	0.00703447	9.42e-05	0.0116746	0.0001725	7.93433	0.285766				071_23CR01B	999	0.0440433	0.0010087	0.0034978	8.04e-05	0.0100491	9.42e-05	0.0116746	0.0001725	12.9343	0.285766				071_23CR01B	999	0.0775397	0.0010087	0.0034978
072_23CR01B	999	0.0103735	0.0010079	0.0034753	8.04e-05	0.0039961	9.42e-05	0.0117493	0.0001725	2.8824	0.285764				072_23CR01B	999	0.0271217	0.0010079	0.0034753	8.04e-05	0.00701077	9.42e-05	0.0117493	0.0001725	7.8824	0.285764				072_23CR01B	999	0.0438698	0.0010079	0.0034753	8.04e-05	0.0100254	9.42e-05	0.0117493	0.0001725	12.8824	0.285764				072_23CR01B	999	0.0773662	0.0010079	0.0034753
074_23CR01B	999	0.0099617	0.0003633	0.0034443	9.08e-05	0.0039525	0.000141	0.0118362	0.0003594	2.75987	0.0383538				074_23CR01B	999	0.0267099	0.0003633	0.0034443	9.08e-05	0.00696717	0.000141	0.0118362	0.0003594	7.75987	0.0383538				074_23CR01B	999	0.043458	0.0003633	0.0034443	9.08e-05	0.00998184	0.000141	0.0118362	0.0003594	12.7599	0.0383538				074_23CR01B	999	0.0769544	0.0003633	0.0034443
075_23CR01B	999	0.009824	0.0003616	0.0034332	9.08e-05	0.0039335	0.000141	0.0118419	0.0003594	2.72164	0.0383453				075_23CR01B	999	0.0265722	0.0003616	0.0034332	9.08e-05	0.00694817	0.000141	0.0118419	0.0003594	7.72164	0.0383453				075_23CR01B	999	0.0433203	0.0003616	0.0034332	9.08e-05	0.00996284	0.000141	0.0118419	0.0003594	12.7216	0.0383453				075_23CR01B	999	0.0768167	0.0003616	0.0034332
076_23CR01B	999	0.0097031	0.0003602	0.0034235	9.08e-05	0.0039143	0.000141	0.0118402	0.0003594	2.68866	0.038338				076_23CR01B	999	0.0264513	0.0003602	0.0034235	9.08e-05	0.00692897	0.000141	0.0118402	0.0003594	7.68866	0.038338				076_23CR01B	999	0.0431994	0.0003602	0.0034235	9.08e-05	0.00994364	0.000141	0.0118402	0.0003594	12.6887	0.038338				076_23CR01B	999	0.0766958	0.0003602	0.0034235
084_23CR01B	999	0.0092007	0.0003539	0.0034078	9.08e-05	0.0036017	0.000141	0.0110302	0.0003593	2.5622	0.0383109				084_23CR01B	999	0.0259489	0.0003539	0.0034078	9.08e-05	0.00661637	0.000141	0.0110302	0.0003593	7.5622	0.0383109				084_23CR01B	999	0.042697	0.0003539	0.0034078	9.08e-05	0.00963104	0.000141	0.0110302	0.0003593	12.5622	0.0383109				084_23CR01B	999	0.0761934	0.0003539	0.0034078
085_23CR01B	999	0.0092075	0.000354	0.0034106	9.08e-05	0.0035951	0.000141	0.0109864	0.0003593	2.56113	0.0383107				085_23CR01B	999	0.0259557	0.000354	0.0034106	9.08e-05	0.00660977	0.000141	0.0109864	0.0003593	7.56113	0.0383107				085_23CR01B	999	0.0427038	0.000354	0.0034106	9.08e-05	0.00962444	0.000141	0.0109864	0.0003593	12.5611	0.0383107				085_23CR01B	999	0.0762002	0.000354	0.0034106
086_23CR01B	999	0.0092133	0.0003541	0.0034134	9.08e-05	0.003589	0.000141	0.0109424	0.0003593	2.55927	0.0383103				086_23CR01B	999	0.0259615	0.0003541	0.0034134	9.08e-05	0.00660367	0.000141	0.0109424	0.0003593	7.55927	0.0383103				086_23CR01B	999	0.0427096	0.0003541	0.0034134	9.08e-05	0.00961834	0.000141	0.0109424	0.0003593	12.5593	0.0383103				086_23CR01B	999	0.076206	0.0003541	0.0034134
087_23CR01B	999	0.0092176	0.0003541	0.0034161	9.08e-05	0.0035838	0.000141	0.0108996	0.0003593	2.55659	0.0383098				087_23CR01B	999	0.0259658	0.0003541	0.0034161	9.08e-05	0.00659847	0.000141	0.0108996	0.0003593	7.55659	0.0383098				087_23CR01B	999	0.0427139	0.0003541	0.0034161	9.08e-05	0.00961314	0.000141	0.0108996	0.0003593	12.5566	0.0383098				087_23CR01B	999	0.0762103	0.0003541	0.0034161
089_23CR01B	999	0.0092207	0.0003542	0.0034207	9.08e-05	0.0035758	0.000141	0.01082	0.0003593	2.54891	0.0383082				089_23CR01B	999	0.0259689	0.0003542	0.0034207	9.08e-05	0.00659047	0.000141	0.01082	0.0003593	7.54891	0.0383082				089_23CR01B	999	0.042717	0.0003542	0.0034207	9.08e-05	0.00960514	0.000141	0.01082	0.0003593	12.5489	0.0383082				089_23CR01B	999	0.0762134	0.0003542	0.0034207
090_23CR01B	999	0.0092194	0.0003542	0.0034228	9.08e-05	0.0035728	0.000141	0.0107809	0.0003593	2.54365	0.0383071				090_23CR01B	999	0.0259676	0.0003542	0.0034228	9.08e-05	0.00658747	0.000141	0.0107809	0.0003593	7.54365	0.0383071				090_23CR01B	999	0.0427157	0.0003542	0.0034228	9.08e-05	0.00960214	0.000141	0.0107809	0.0003593	12.5436	0.0383071				090_23CR01B	999	0.0762121	0.0003542	0.0034228
091_23CR01B	999	0.0092159	0.0003541	0.0034244	9.08e-05	0.0035705	0.000141	0.0107441	0.0003593	2.53771	0.0383058				091_23CR01B	999	0.0259641	0.0003541	0.0034244	9.08e-05	0.00658517	0.000141	0.0107441	0.0003593	7.53771	0.0383058				091_23CR01B	999	0.0427122	0.0003541	0.0034244	9.08e-05	0.00959984	0.000141	0.0107441	0.0003593	12.5377	0.0383058				091_23CR01B	999	0.0762086	0.0003541	0.0034244
092_23CR01B	999	0.0092102	0.0003541	0.0034258	9.08e-05	0.0035688	0.000141	0.0107073	0.0003593	2.53075	0.0383044				092_23CR01B	999	0.0259584	0.0003541	0.0034258	9.08e-05	0.00658347	0.000141	0.0107073	0.0003593	7.53075	0.0383044				092_23CR01B	999	0.0427065	0.0003541	0.0034258	9.08e-05	0.00959814	0.000141	0.0107073	0.0003593	12.5307	0.0383044				092_23CR01B	999	0.0762029	0.0003541	0.0034258
094_23CR01B	999	0.0091925	0.0003538	0.0034274	9.08e-05	0.003567	0.000141	0.0106392	0.0003593	2.51501	0.0383012				094_23CR01B	999	0.0259407	0.0003538	0.0034274	9.08e-05	0.00658167	0.000141	0.0106392	0.0003593	7.51501	0.0383012				094_23CR01B	999	0.0426888	0.0003538	0.0034274	9.08e-05	0.00959634	0.000141	0.0106392	0.0003593	12.515	0.0383012				094_23CR01B	999	0.0761852	0.0003538	0.0034274
095_23CR01B	999	0.0091801	0.0003537	0.0034276	9.08e-05	0.0035667	0.000141	0.0106055	0.0003593	2.50589	0.0382993				095_23CR01B	999	0.0259283	0.0003537	0.0034276	9.08e-05	0.00658137	0.000141	0.0106055	0.0003593	7.50589	0.0382993				095_23CR01B	999	0.0426764	0.0003537	0.0034276	9.08e-05	0.00959604	0.000141	0.0106055	0.0003593	12.5059	0.0382993				095_23CR01B	999	0.0761728	0.0003537	0.0034276
096_23CR01B	999	0.0091656	0.0003535	0.0034273	9.08e-05	0.0035669	0.000141	0.0105725	0.0003593	2.49619	0.0382973				096_23CR01B	999	0.0259138	0.0003535	0.0034273	9.08e-05	0.00658157	0.000141	0.0105725	0.0003593	7.49619	0.0382973				096_23CR01B	999	0.0426619	0.0003535	0.0034273	9.08e-05	0.00959624	0.000141	0.0105725	0.0003593	12.4962	0.0382973				096_23CR01B	999	0.0761583	0.0003535	0.0034273
097_23CR01B	999	0.0091496	0.0003533	0.0034265	9.08e-05	0.0035673	0.000141	0.0105412	0.0003593	2.48635	0.0382953				097_23CR01B	999	0.0258978	0.0003533	0.0034265	9.08e-05	0.00658197	0.000141	0.0105412	0.0003593	7.48635	0.0382953				097_23CR01B	999	0.0426459	0.0003533	0.0034265	9.08e-05	0.00959664	0.000141	0.0105412	0.0003593	12.4863	0.0382953				097_23CR01B	999	0.0761423	0.0003533	0.0034265
099_23CR01B	999	0.0091127	0.0003528	0.0034234	9.08e-05	0.0035686	0.000141	0.0104795	0.0003593	2.46587	0.0382912				099_23CR01B	999	0.0258609	0.0003528	0.0034234	9.08e-05	0.00658327	0.000141	0.0104795	0.0003593	7.46587	0.0382912				099_23CR01B	999	0.042609	0.0003528	0.0034234	9.08e-05	0.00959794	0.000141	0.0104795	0.0003593	12.4659	0.0382912				099_23CR01B	999	0.0761054	0.0003528	0.0034234
100_23CR01B	999	0.0090916	0.0003526	0.0034209	9.08e-05	0.0035695	0.000141	0.0104479	0.0003593	2.4552	0.038289				100_23CR01B	999	0.0258398	0.0003526	0.0034209	9.08e-05	0.00658417	0.000141	0.0104479	0.0003593	7.4552	0.038289				100_23CR01B	999	0.0425879	0.0003526	0.0034209	9.08e-05	0.00959884	0.000141	0.0104479	0.0003593	12.4552	0.038289				100_23CR01B	999	0.0760843	0.0003526	0.0034209
101_23CR01B	999	0.0090695	0.0003523	0.0034179	9.08e-05	0.0035702	0.000141	0.0104159	0.0003593	2.44469	0.0382869				101_23CR01B	999	0.0258177	0.0003523	0.0034179	9.08e-05	0.00658487	0.000141	0.0104159	0.0003593	7.44469	0.0382869				101_23CR01B	999	0.0425658	0.0003523	0.0034179	9.08e-05	0.00959954	0.000141	0.0104159	0.0003593	12.4447	0.0382869				101_23CR01B	999	0.0760622	0.0003523	0.0034179
102_23CR01B	999	0.0090467	0.000352	0.0034141	9.08e-05	0.0035708	0.000141	0.0103834	0.0003593	2.43452	0.0382849				102_23CR01B	999	0.0257949	0.000352	0.0034141	9.08e-05	0.00658547	0.000141	0.0103834	0.0003593	7.43452	0.0382849				102_23CR01B	999	0.042543	0.000352	0.0034141	9.08e-05	0.00960014	0.000141	0.0103834	0.0003593	12.4345	0.0382849				102_23CR01B	999	0.0760394	0.000352	0.0034141
104_23CR01B	999	0.009002	0.0003514	0.003405	9.08e-05	0.0035711	0.000141	0.0103177	0.0003593	2.41665	0.0382814				104_23CR01B	999	0.0257502	0.0003514	0.003405	9.08e-05	0.00658577	0.000141	0.0103177	0.0003593	7.41665	0.0382814				104_23CR01B	999	0.0424983	0.0003514	0.003405	9.08e-05	0.00960044	0.000141	0.0103177	0.0003593	12.4166	0.0382814				104_23CR01B	999	0.0759947	0.0003514	0.003405
105_23CR01B	999	0.0089796	0.0003512	0.0033992	9.08e-05	0.0035706	0.000141	0.0102817	0.0003593	2.40884	0.0382798				105_23CR01B	999	0.0257278	0.0003512	0.0033992	9.08e-05	0.00658527	0.000141	0.0102817	0.0003593	7.40884	0.0382798				105_23CR01B	999	0.0424759	0.0003512	0.0033992	9.08e-05	0.00959994	0.000141	0.0102817	0.0003593	12.4088	0.0382798				105_23CR01B	999	0.0759723	0.0003512	0.0033992
106_23CR01B	999	0.008959	0.0003509	0.0033929	9.08e-05	0.0035695	0.000141	0.010245	0.0003593	2.40252	0.0382786				106_23CR01B	999	0.0257072	0.0003509	0.0033929	9.08e-05	0.00658417	0.000141	0.010245	0.0003593	7.40252	0.0382786				106_23CR01B	999	0.0424553	0.0003509	0.0033929	9.08e-05	0.00959884	0.000141	0.010245	0.0003593	12.4025	0.0382786				106_23CR01B	999	0.0759517	0.0003509	0.0033929
107_23CR01B	999	0.0089394	0.0003506	0.0033857	9.08e-05	0.0035676	0.000141	0.0102048	0.0003593	2.39755	0.0382776				107_23CR01B	999	0.0256876	0.0003506	0.0033857	9.08e-05	0.00658227	0.000141	0.0102048	0.0003593	7.39755	0.0382776				107_23CR01B	999	0.0424357	0.0003506	0.0033857	9.08e-05	0.00959694	0.000141	0.0102048	0.0003593	12.3976	0.0382776				107_23CR01B	999	0.0759321	0.0003506	0.0033857
109_23CR01B	999	0.0089083	0.0003503	0.0033696	9.08e-05	0.0035613	0.000141	0.0101188	0.0003593	2.39357	0.0382768				109_23CR01B	999	0.0256565	0.0003503	0.0033696	9.08e-05	0.00657597	0.000141	0.0101188	0.0003593	7.39357	0.0382768				109_23CR01B	999	0.0424046	0.0003503	0.0033696	9.08e-05	0.00959064	0.000141	0.0101188	0.0003593	12.3936	0.0382768				109_23CR01B	999	0.075901	0.0003503	0.0033696
110_23CR01B	999	0.0088971	0.0003501	0.0033601	9.08e-05	0.0035563	0.000141	0.0100692	0.0003593	2.39506	0.0382771				110_23CR01B	999	0.0256453	0.0003501	0.0033601	9.08e-05	0.00657097	0.000141	0.0100692	0.0003593	7.39506	0.0382771				110_23CR01B	999	0.0423934	0.0003501	0.0033601	9.08e-05	0.00958564	0.000141	0.0100692	0.0003593	12.3951	0.0382771				110_23CR01B	999	0.0758898	0.0003501	0.0033601
111_23CR01B	999	0.0088902	0.00035	0.0033498	9.08e-05	0.0035501	0.000141	0.0100156	0.0003593	2.39941	0.038278				111_23CR01B	999	0.0256384	0.00035	0.0033498	9.08e-05	0.00656477	0.000141	0.0100156	0.0003593	7.39941	0.038278				111_23CR01B	999	0.0423865	0.00035	0.0033498	9.08e-05	0.00957944	0.000141	0.0100156	0.0003593	12.3994	0.038278				111_23CR01B	999	0.0758829	0.00035	0.0033498
112_23CR01B	999	0.0088884	0.00035	0.0033391	9.08e-05	0.0035426	0.000141	0.0099591	0.0003593	2.40672	0.0382794				112_23CR01B	999	0.0256366	0.00035	0.0033391	9.08e-05	0.00655727	0.000141	0.0099591	0.0003593	7.40672	0.0382794				112_23CR01B	999	0.0423847	0.00035	0.0033391	9.08e-05	0.00957194	0.000141	0.0099591	0.0003593	12.4067	0.0382794				112_23CR01B	999	0.0758811	0.00035	0.0033391
114_23CR01B	999	0.0089019	0.0003502	0.0033152	9.07e-05	0.0035228	0.000141	0.009831	0.0003593	2.43189	0.0382844				114_23CR01B	999	0.0256501	0.0003502	0.0033152	9.07e-05	0.00653747	0.000141	0.009831	0.0003593	7.43189	0.0382844				114_23CR01B	999	0.0423982	0.0003502	0.0033152	9.07e-05	0.00955214	0.000141	0.009831	0.0003593	12.4319	0.0382844				114_23CR01B	999	0.0758946	0.0003502	0.0033152
115_23CR01B	999	0.0089194	0.0003504	0.0033018	9.07e-05	0.0035098	0.000141	0.0097558	0.0003593	2.45115	0.0382882				115_23CR01B	999	0.0256676	0.0003504	0.0033018	9.07e-05	0.00652447	0.000141	0.0097558	0.0003593	7.45115	0.0382882				115_23CR01B	999	0.0424157	0.0003504	0.0033018	9.07e-05	0.00953914	0.000141	0.0097558	0.0003593	12.4511	0.0382882				115_23CR01B	999	0.0759121	0.0003504	0.0033018
116_23CR01B	999	0.0089455	0.0003507	0.0032874	9.07e-05	0.0034946	0.000141	0.0096737	0.0003593	2.47525	0.0382931				116_23CR01B	999	0.0256937	0.0003507	0.0032874	9.07e-05	0.00650927	0.000141	0.0096737	0.0003593	7.47525	0.0382931				116_23CR01B	999	0.0424418	0.0003507	0.0032874	9.07e-05	0.00952394	0.000141	0.0096737	0.0003593	12.4753	0.0382931				116_23CR01B	999	0.0759382	0.0003507	0.0032874
117_23CR01B	999	0.00884	0.0003187	0.0033992	0.0001265	0.0035422	6.86e-05	0.0098202	0.000347	2.40646	0.0097949				117_23CR01B	999	0.0255882	0.0003187	0.0033992	0.0001265	0.00655687	6.86e-05	0.0098202	0.000347	7.40646	0.0097949				117_23CR01B	999	0.0423363	0.0003187	0.0033992	0.0001265	0.00957154	6.86e-05	0.0098202	0.000347	12.4065	0.0097949				117_23CR01B	999	0.0758327	0.0003187	0.0033992
119_23CR01B	999	0.00877	0.0003178	0.0034341	0.0001265	0.0035186	6.86e-05	0.0100172	0.000347	2.40908	0.009797				119_23CR01B	999	0.0255182	0.0003178	0.0034341	0.0001265	0.00653327	6.86e-05	0.0100172	0.000347	7.40908	0.009797				119_23CR01B	999	0.0422663	0.0003178	0.0034341	0.0001265	0.00954794	6.86e-05	0.0100172	0.000347	12.4091	0.009797				119_23CR01B	999	0.0757627	0.0003178	0.0034341
120_23CR01B	999	0.0087489	0.0003175	0.0034456	0.0001265	0.0035096	6.86e-05	0.0101035	0.000347	2.41057	0.0097981				120_23CR01B	999	0.0254971	0.0003175	0.0034456	0.0001265	0.00652427	6.86e-05	0.0101035	0.000347	7.41057	0.0097981				120_23CR01B	999	0.0422452	0.0003175	0.0034456	0.0001265	0.00953894	6.86e-05	0.0101035	0.000347	12.4106	0.0097981				120_23CR01B	999	0.0757416	0.0003175	0.0034456
121_23CR01B	999	0.0087273	0.0003172	0.0034579	0.0001265	0.0034994	6.86e-05	0.0102034	0.000347	2.4124	0.0097995				121_23CR01B	999	0.0254755	0.0003172	0.0034579	0.0001265	0.00651407	6.86e-05	0.0102034	0.000347	7.4124	0.0097995				121_23CR01B	999	0.0422236	0.0003172	0.0034579	0.0001265	0.00952874	6.86e-05	0.0102034	0.000347	12.4124	0.0097995				121_23CR01B	999	0.07572	0.0003172	0.0034579
122_23CR01B	999	0.008705	0.0003169	0.003471	0.0001265	0.0034882	6.86e-05	0.0103169	0.0003471	2.41455	0.0098012				122_23CR01B	999	0.0254532	0.0003169	0.003471	0.0001265	0.00650287	6.86e-05	0.0103169	0.0003471	7.41455	0.0098012				122_23CR01B	999	0.0422013	0.0003169	0.003471	0.0001265	0.00951754	6.86e-05	0.0103169	0.0003471	12.4145	0.0098012				122_23CR01B	999	0.0756977	0.0003169	0.003471
123_23CR01B	999	0.0086827	0.0003166	0.0034844	0.0001265	0.0034763	6.86e-05	0.01044	0.0003471	2.41695	0.009803				123_23CR01B	999	0.0254309	0.0003166	0.0034844	0.0001265	0.00649097	6.86e-05	0.01044	0.0003471	7.41695	0.009803				123_23CR01B	999	0.042179	0.0003166	0.0034844	0.0001265	0.00950564	6.86e-05	0.01044	0.0003471	12.417	0.009803				123_23CR01B	999	0.0756754	0.0003166	0.0034844
Incremental Crushing			36Ar(a) [fA]	37Ar(ca) [fA]	38Ar(cl) [fA]	39Ar(k) [fA]	40Ar(r) [fA]	Age	± 2s	40Ar(r)	39Ar(k)	K/Ca	± 2s		Incremental Crushing			36Ar(a) [fA]	37Ar(ca) [fA]	38Ar(cl) [fA]	39Ar(k) [fA]	40Ar(r) [fA]	Age	± 2s	40Ar(r)	39Ar(k)	K/Ca	± 2s		Incremental Crushing			36Ar(a) [fA]	37Ar(ca) [fA]	38Ar(cl) [fA]	39Ar(k) [fA]	40Ar(r) [fA]	Age	± 2s	40Ar(r)	39Ar(k)	K/Ca	± 2s		Incremental Crushing			36Ar(a) [fA]	37Ar(ca) [fA]
								(Ma)		(%)	(%)												(Ma)		(%)	(%)												(Ma)		(%)	(%)
003_23CR01B	1		0.722864	0.339547	0.00841448	0.0246674	133.151	5461.32	82.458	38.1555	0.0276806	0.0312386	0.0559359		003_23CR01B	1		0.722864	0.339547	0.00841448	0.0246674	133.151	5461.32	82.458	38.1555	0.0276806	0.0312386	0.0559359		003_23CR01B	1		0.722864	0.339547	0.00841448	0.0246674	133.151	5461.32	82.458	38.1555	0.0276806	0.0312386	0.0559359		003_23CR01B	1		0.722864	0.339547
004_23CR01B	3		2.4657	1.29495	0.0170841	0.0893979	569.534	5750.45	31.5889	43.6193	0.100318	0.0296855	0.0140954		004_23CR01B	3		2.4657	1.29495	0.0170841	0.0893979	569.534	5750.45	31.5889	43.6193	0.100318	0.0296855	0.0140954		004_23CR01B	3		2.4657	1.29495	0.0170841	0.0893979	569.534	5750.45	31.5889	43.6193	0.100318	0.0296855	0.0140954		004_23CR01B	3		2.4657	1.29495
005_23CR01B	5		3.28855	1.39348	0.0209795	0.126816	867.593	5875.43	33.4172	46.9116	0.142308	0.039133	0.0169844		005_23CR01B	5		3.28855	1.39348	0.0209795	0.126816	867.593	5875.43	33.4172	46.9116	0.142308	0.039133	0.0169844		005_23CR01B	5		3.28855	1.39348	0.0209795	0.126816	867.593	5875.43	33.4172	46.9116	0.142308	0.039133	0.0169844		005_23CR01B	5		3.28855	1.39348
013_23CR01B	7		2.32865	0.970513	0.0147295	0.100632	741.922	6007	35.5364	51.6241	0.112924	0.0445863	0.01228		013_23CR01B	7		2.32865	0.970513	0.0147295	0.100632	741.922	6007	35.5364	51.6241	0.112924	0.0445863	0.01228		013_23CR01B	7		2.32865	0.970513	0.0147295	0.100632	741.922	6007	35.5364	51.6241	0.112924	0.0445863	0.01228		013_23CR01B	7		2.32865	0.970513
014_23CR01B	9		2.58425	1.2655	0.012486	0.100461	750.69	6030.69	34.0915	49.3147	0.112733	0.0341351	0.00728091		014_23CR01B	9		2.58425	1.2655	0.012486	0.100461	750.69	6030.69	34.0915	49.3147	0.112733	0.0341351	0.00728091		014_23CR01B	9		2.58425	1.2655	0.012486	0.100461	750.69	6030.69	34.0915	49.3147	0.112733	0.0341351	0.00728091		014_23CR01B	9		2.58425	1.2655
015_23CR01B	11		2.1552	1.29498	0.0136676	0.0938028	707.658	6047.51	39.2851	52.3758	0.105261	0.0311474	0.00572137		015_23CR01B	11		2.1552	1.29498	0.0136676	0.0938028	707.658	6047.51	39.2851	52.3758	0.105261	0.0311474	0.00572137		015_23CR01B	11		2.1552	1.29498	0.0136676	0.0938028	707.658	6047.51	39.2851	52.3758	0.105261	0.0311474	0.00572137		015_23CR01B	11		2.1552	1.29498
016_23CR01B	13		1.87477	1.10112	0.013726	0.0808365	596.758	6009.3	38.0654	51.6009	0.0907111	0.0315677	0.00853586		016_23CR01B	13		1.87477	1.10112	0.013726	0.0808365	596.758	6009.3	38.0654	51.6009	0.0907111	0.0315677	0.00853586		016_23CR01B	13		1.87477	1.10112	0.013726	0.0808365	596.758	6009.3	38.0654	51.6009	0.0907111	0.0315677	0.00853586		016_23CR01B	13		1.87477	1.10112
018_23CR01B	17		1.39903	0.934096	0.00864338	0.0715906	481.733	5846.36	49.1548	53.56	0.0803358	0.0329559	0.0117279		018_23CR01B	17		1.39903	0.934096	0.00864338	0.0715906	481.733	5846.36	49.1548	53.56	0.0803358	0.0329559	0.0117279		018_23CR01B	17		1.39903	0.934096	0.00864338	0.0715906	481.733	5846.36	49.1548	53.56	0.0803358	0.0329559	0.0117279		018_23CR01B	17		1.39903	0.934096
019_23CR01B	21		1.17818	0.756585	0.00584913	0.0751507	406.198	5463.66	38.9152	53.5912	0.0843307	0.0427114	0.0178535		019_23CR01B	21		1.17818	0.756585	0.00584913	0.0751507	406.198	5463.66	38.9152	53.5912	0.0843307	0.0427114	0.0178535		019_23CR01B	21		1.17818	0.756585	0.00584913	0.0751507	406.198	5463.66	38.9152	53.5912	0.0843307	0.0427114	0.0178535		019_23CR01B	21		1.17818	0.756585
020_23CR01B	25		1.23214	0.64956	0.010226	0.0856505	449.389	5412.03	31.3739	54.9874	0.0961131	0.0566995	0.0264084		020_23CR01B	25		1.23214	0.64956	0.010226	0.0856505	449.389	5412.03	31.3739	54.9874	0.0961131	0.0566995	0.0264084		020_23CR01B	25		1.23214	0.64956	0.010226	0.0856505	449.389	5412.03	31.3739	54.9874	0.0961131	0.0566995	0.0264084		020_23CR01B	25		1.23214	0.64956
021_23CR01B	30		1.11212	0.797486	0.0125459	0.0971978	409.411	5033.24	39.1117	55.218	0.109071	0.0524085	0.0172827		021_23CR01B	30		1.11212	0.797486	0.0125459	0.0971978	409.411	5033.24	39.1117	55.218	0.109071	0.0524085	0.0172827		021_23CR01B	30		1.11212	0.797486	0.0125459	0.0971978	409.411	5033.24	39.1117	55.218	0.109071	0.0524085	0.0172827		021_23CR01B	30		1.11212	0.797486
023_23CR01B	35		1.14743	0.88594	0.0121815	0.108912	415.811	4865.39	29.2984	54.8284	0.122216	0.0528616	0.0210236		023_23CR01B	35		1.14743	0.88594	0.0121815	0.108912	415.811	4865.39	29.2984	54.8284	0.122216	0.0528616	0.0210236		023_23CR01B	35		1.14743	0.88594	0.0121815	0.108912	415.811	4865.39	29.2984	54.8284	0.122216	0.0528616	0.0210236		023_23CR01B	35		1.14743	0.88594
024_23CR01B	40		0.859091	0.624749	0.00939889	0.114476	317.877	4330.1	31.0795	55.3438	0.12846	0.0787911	0.0398653		024_23CR01B	40		0.859091	0.624749	0.00939889	0.114476	317.877	4330.1	31.0795	55.3438	0.12846	0.0787911	0.0398653		024_23CR01B	40		0.859091	0.624749	0.00939889	0.114476	317.877	4330.1	31.0795	55.3438	0.12846	0.0787911	0.0398653		024_23CR01B	40		0.859091	0.624749
025_23CR01B	50		0.801457	0.512157	0.00573682	0.146464	308.193	3876.56	28.5126	56.2934	0.164355	0.122969	0.0638633		025_23CR01B	50		0.801457	0.512157	0.00573682	0.146464	308.193	3876.56	28.5126	56.2934	0.164355	0.122969	0.0638633		025_23CR01B	50		0.801457	0.512157	0.00573682	0.146464	308.193	3876.56	28.5126	56.2934	0.164355	0.122969	0.0638633		025_23CR01B	50		0.801457	0.512157
026_23CR01B	60		0.829879	0.464613	0.00498918	0.181308	320.435	3598.72	21.6356	56.3943	0.203456	0.167801	0.116182		026_23CR01B	60		0.829879	0.464613	0.00498918	0.181308	320.435	3598.72	21.6356	56.3943	0.203456	0.167801	0.116182		026_23CR01B	60		0.829879	0.464613	0.00498918	0.181308	320.435	3598.72	21.6356	56.3943	0.203456	0.167801	0.116182		026_23CR01B	60		0.829879	0.464613
028_23CR01B	70		0.833456	0.931937	0.00576791	0.212967	327.078	3379.94	18.8641	56.7928	0.238981	0.0982637	0.0350988		028_23CR01B	70		0.833456	0.931937	0.00576791	0.212967	327.078	3379.94	18.8641	56.7928	0.238981	0.0982637	0.0350988		028_23CR01B	70		0.833456	0.931937	0.00576791	0.212967	327.078	3379.94	18.8641	56.7928	0.238981	0.0982637	0.0350988		028_23CR01B	70		0.833456	0.931937
029_23CR01B	80		0.753763	0.417391	0.00600756	0.25317	299.679	2987.24	18.4715	57.1119	0.284095	0.260818	0.188411		029_23CR01B	80		0.753763	0.417391	0.00600756	0.25317	299.679	2987.24	18.4715	57.1119	0.284095	0.260818	0.188411		029_23CR01B	80		0.753763	0.417391	0.00600756	0.25317	299.679	2987.24	18.4715	57.1119	0.284095	0.260818	0.188411		029_23CR01B	80		0.753763	0.417391
030_23CR01B	90		0.672386	0.653938	0.0052455	0.271924	271.204	2739.38	16.25	57.4643	0.305141	0.178805	0.0704829		030_23CR01B	90		0.672386	0.653938	0.0052455	0.271924	271.204	2739.38	16.25	57.4643	0.305141	0.178805	0.0704829		030_23CR01B	90		0.672386	0.653938	0.0052455	0.271924	271.204	2739.38	16.25	57.4643	0.305141	0.178805	0.0704829		030_23CR01B	90		0.672386	0.653938
031_23CR01B	100		0.618695	0.718782	0.00786064	0.304393	259.629	2521.18	14.4512	58.4293	0.341576	0.182098	0.0713369		031_23CR01B	100		0.618695	0.718782	0.00786064	0.304393	259.629	2521.18	14.4512	58.4293	0.341576	0.182098	0.0713369		031_23CR01B	100		0.618695	0.718782	0.00786064	0.304393	259.629	2521.18	14.4512	58.4293	0.341576	0.182098	0.0713369		031_23CR01B	100		0.618695	0.718782
033_23CR01B	120		0.562496	0.438298	0.00798479	0.342537	239.387	2255.57	12.9955	58.7704	0.38438	0.336052	0.191099		033_23CR01B	120		0.562496	0.438298	0.00798479	0.342537	239.387	2255.57	12.9955	58.7704	0.38438	0.336052	0.191099		033_23CR01B	120		0.562496	0.438298	0.00798479	0.342537	239.387	2255.57	12.9955	58.7704	0.38438	0.336052	0.191099		033_23CR01B	120		0.562496	0.438298
034_23CR01B	140		0.550748	0.655518	0.00468267	0.389812	243.206	2110.94	12.2859	59.6623	0.437429	0.255704	0.106109		034_23CR01B	140		0.550748	0.655518	0.00468267	0.389812	243.206	2110.94	12.2859	59.6623	0.437429	0.255704	0.106109		034_23CR01B	140		0.550748	0.655518	0.00468267	0.389812	243.206	2110.94	12.2859	59.6623	0.437429	0.255704	0.106109		034_23CR01B	140		0.550748	0.655518
035_23CR01B	180		0.567862	0.538958	0.00614836	0.453317	248.892	1954.1	12.317	59.4819	0.508692	0.361672	0.167985		035_23CR01B	180		0.567862	0.538958	0.00614836	0.453317	248.892	1954.1	12.317	59.4819	0.508692	0.361672	0.167985		035_23CR01B	180		0.567862	0.538958	0.00614836	0.453317	248.892	1954.1	12.317	59.4819	0.508692	0.361672	0.167985		035_23CR01B	180		0.567862	0.538958
036_23CR01B	230		0.618682	0.816996	0.00728428	0.539148	273.577	1860.71	11.6746	59.695	0.605007	0.283763	0.0946268		036_23CR01B	230		0.618682	0.816996	0.00728428	0.539148	273.577	1860.71	11.6746	59.695	0.605007	0.283763	0.0946268		036_23CR01B	230		0.618682	0.816996	0.00728428	0.539148	273.577	1860.71	11.6746	59.695	0.605007	0.283763	0.0946268		036_23CR01B	230		0.618682	0.816996
038_23CR01B	290		0.658884	0.471542	0.00586045	0.605909	290.016	1793.24	12.3992	59.5842	0.679924	0.55253	0.329715		038_23CR01B	290		0.658884	0.471542	0.00586045	0.605909	290.016	1793.24	12.3992	59.5842	0.679924	0.55253	0.329715		038_23CR01B	290		0.658884	0.471542	0.00586045	0.605909	290.016	1793.24	12.3992	59.5842	0.679924	0.55253	0.329715		038_23CR01B	290		0.658884	0.471542
039_23CR01B	370		0.673406	0.682918	0.00623727	0.670048	293.349	1692.99	11.0946	59.3341	0.751897	0.421896	0.187113		039_23CR01B	370		0.673406	0.682918	0.00623727	0.670048	293.349	1692.99	11.0946	59.3341	0.751897	0.421896	0.187113		039_23CR01B	370		0.673406	0.682918	0.00623727	0.670048	293.349	1692.99	11.0946	59.3341	0.751897	0.421896	0.187113		039_23CR01B	370		0.673406	0.682918
040_23CR01B	470		0.693184	0.537305	0.00429559	0.756943	295.689	1569.95	10.5001	58.8264	0.849407	0.605774	0.28657		040_23CR01B	470		0.693184	0.537305	0.00429559	0.756943	295.689	1569.95	10.5001	58.8264	0.849407	0.605774	0.28657		040_23CR01B	470		0.693184	0.537305	0.00429559	0.756943	295.689	1569.95	10.5001	58.8264	0.849407	0.605774	0.28657		040_23CR01B	470		0.693184	0.537305
041_23CR01B	590		0.773592	0.594219	0.00872193	0.92216	307.824	1409.8	9.62129	57.1327	1.03481	0.66731	0.280871		041_23CR01B	590		0.773592	0.594219	0.00872193	0.92216	307.824	1409.8	9.62129	57.1327	1.03481	0.66731	0.280871		041_23CR01B	590		0.773592	0.594219	0.00872193	0.92216	307.824	1409.8	9.62129	57.1327	1.03481	0.66731	0.280871		041_23CR01B	590		0.773592	0.594219
049_23CR01B	750		0.713949	0.741838	0.00541043	1.10906	292.816	1191.8	8.76017	57.8718	1.24454	0.642859	0.226991		049_23CR01B	750		0.713949	0.741838	0.00541043	1.10906	292.816	1191.8	8.76017	57.8718	1.24454	0.642859	0.226991		049_23CR01B	750		0.713949	0.741838	0.00541043	1.10906	292.816	1191.8	8.76017	57.8718	1.24454	0.642859	0.226991		049_23CR01B	750		0.713949	0.741838
050_23CR01B	300		0.496388	0.475736	0.00313757	0.87341	173.886	962.614	8.45476	53.987	0.980101	0.789442	0.573105		050_23CR01B	300		0.496388	0.475736	0.00313757	0.87341	173.886	962.614	8.45476	53.987	0.980101	0.789442	0.573105		050_23CR01B	300		0.496388	0.475736	0.00313757	0.87341	173.886	962.614	8.45476	53.987	0.980101	0.789442	0.573105		050_23CR01B	300		0.496388	0.475736
051_23CR01B	500		0.74866	0.776362	0.00272247	1.58958	239.434	770.672	7.24588	51.7186	1.78376	0.880414	0.397128		051_23CR01B	500		0.74866	0.776362	0.00272247	1.58958	239.434	770.672	7.24588	51.7186	1.78376	0.880414	0.397128		051_23CR01B	500		0.74866	0.776362	0.00272247	1.58958	239.434	770.672	7.24588	51.7186	1.78376	0.880414	0.397128		051_23CR01B	500		0.74866	0.776362
052_23CR01B	700		0.759089	0.730173	0.00268362	2.30665	239.593	564.21	5.49842	51.3896	2.58842	1.35839	0.505819		052_23CR01B	700		0.759089	0.730173	0.00268362	2.30665	239.593	564.21	5.49842	51.3896	2.58842	1.35839	0.505819		052_23CR01B	700		0.759089	0.730173	0.00268362	2.30665	239.593	564.21	5.49842	51.3896	2.58842	1.35839	0.505819		052_23CR01B	700		0.759089	0.730173
054_23CR01B	900		0.72553	0.628909	0.00389826	3.10445	219.506	402.227	4.16895	50.3312	3.48367	2.12258	0.883413		054_23CR01B	900		0.72553	0.628909	0.00389826	3.10445	219.506	402.227	4.16895	50.3312	3.48367	2.12258	0.883413		054_23CR01B	900		0.72553	0.628909	0.00389826	3.10445	219.506	402.227	4.16895	50.3312	3.48367	2.12258	0.883413		054_23CR01B	900		0.72553	0.628909
055_23CR01B	700		0.303826	0.194621	0.00121289	1.52735	92.0151	348.003	4.80725	50.3567	1.71392	3.37455	5.01236		055_23CR01B	700		0.303826	0.194621	0.00121289	1.52735	92.0151	348.003	4.80725	50.3567	1.71392	3.37455	5.01236		055_23CR01B	700		0.303826	0.194621	0.00121289	1.52735	92.0151	348.003	4.80725	50.3567	1.71392	3.37455	5.01236		055_23CR01B	700		0.303826	0.194621
056_23CR01B	999		0.378872	0.415237	0.00232932	2.3276	116.002	292.418	3.59367	50.6293	2.61192	2.41035	1.47631		056_23CR01B	999		0.361795	0.415237	0.00250425	2.3276	116.1	292.647	3.58087	51.8027	2.61192	2.41035	1.47631		056_23CR01B	999		0.344719	0.415237	0.00267926	2.3276	116.198	292.876	3.56862	53.0297	2.61192	2.41035	1.47631		056_23CR01B	999		0.310566	0.415237
057_23CR01B	999		0.318016	0.335692	0.00259824	2.37513	104.337	260.093	3.49756	52.3553	2.66526	3.04239	2.03449		057_23CR01B	999		0.30094	0.335692	0.00277317	2.37513	104.435	260.322	3.48657	53.7533	2.66526	3.04239	2.03449		057_23CR01B	999		0.283864	0.335692	0.00294818	2.37513	104.533	260.55	3.47615	55.2251	2.66526	3.04239	2.03449		057_23CR01B	999		0.249711	0.335692
059_23CR01B	999		0.303516	0.56247	0.00135479	2.28658	92.6397	241.151	3.39437	50.5511	2.5659	1.74806	0.771967		059_23CR01B	999		0.28644	0.56247	0.00152971	2.28658	92.738	241.391	3.38246	52.0242	2.5659	1.74806	0.771967		059_23CR01B	999		0.269363	0.56247	0.00170472	2.28658	92.8363	241.63	3.37121	53.5823	2.5659	1.74806	0.771967		059_23CR01B	999		0.235211	0.56247
060_23CR01B	999		0.246278	0.116606	0.00099828	2.31598	86.5674	223.577	3.0961	54.0715	2.59888	8.54044	19.7861		060_23CR01B	999		0.229201	0.116606	0.00117321	2.31598	86.6658	223.816	3.08567	55.8781	2.59888	8.54044	19.7861		060_23CR01B	999		0.212125	0.116606	0.00134822	2.31598	86.7641	224.055	3.07595	57.8049	2.59888	8.54044	19.7861		060_23CR01B	999		0.177972	0.116606
061_23CR01B	999		0.274054	0.206693	0.000479658	2.2998	83.3791	217.241	3.42589	50.4708	2.58073	4.78445	5.28129		061_23CR01B	999		0.256977	0.206693	0.000654586	2.2998	83.4775	217.482	3.41504	52.1074	2.58073	4.78445	5.28129		061_23CR01B	999		0.239901	0.206693	0.000829595	2.2998	83.5758	217.724	3.40485	53.8495	2.58073	4.78445	5.28129		061_23CR01B	999		0.205748	0.206693
062_23CR01B	999		0.214418	0.175012	0.00212129	2.22059	72.8219	197.581	3.14709	53.2166	2.49184	5.45593	9.91361		062_23CR01B	999		0.197342	0.175012	0.00229621	2.22059	72.9203	197.833	3.13709	55.3094	2.49184	5.45593	9.91361		062_23CR01B	999		0.180266	0.175012	0.00247122	2.22059	73.0186	198.086	3.12788	57.5672	2.49184	5.45593	9.91361		062_23CR01B	999		0.146113	0.175012
064_23CR01B	999		0.198194	0.0649913	0.00117973	2.17089	67.1226	186.843	3.26437	53.1465	2.43608	14.3632	49.8957		064_23CR01B	999		0.181118	0.0649913	0.00135466	2.17089	67.2209	187.103	3.25487	55.4183	2.43608	14.3632	49.8957		064_23CR01B	999		0.164041	0.0649913	0.00152967	2.17089	67.3193	187.363	3.24617	57.8855	2.43608	14.3632	49.8957		064_23CR01B	999		0.129889	0.0649913
065_23CR01B	999		0.194502	0.18435	0	2.10822	63.025	180.949	3.17539	52.045	2.36575	4.91745	8.34073		065_23CR01B	999		0.177425	0.18435	0	2.10822	63.1233	181.217	3.1652	54.3711	2.36575	4.91745	8.34073		065_23CR01B	999		0.160349	0.18435	0	2.10822	63.2216	181.486	3.1559	56.9065	2.36575	4.91745	8.34073		065_23CR01B	999		0.126196	0.18435
066_23CR01B	999		0.172401	0.216584	0.000612291	2.03192	58.72	175.199	3.18368	53.2879	2.28012	4.03412	5.69104		066_23CR01B	999		0.155325	0.216584	0.000787219	2.03192	58.8184	175.479	3.17392	55.9142	2.28012	4.03412	5.69104		066_23CR01B	999		0.138249	0.216584	0.000962229	2.03192	58.9167	175.758	3.16512	58.8027	2.28012	4.03412	5.69104		066_23CR01B	999		0.104096	0.216584
067_23CR01B	999		0.225345	0.151495	0.00175866	2.00538	55.8162	169.027	3.55245	45.3433	2.25035	5.69204	8.19547		067_23CR01B	999		0.208269	0.151495	0.00193358	2.00538	55.9146	169.312	3.54053	47.3463	2.25035	5.69204	8.19547		067_23CR01B	999		0.191193	0.151495	0.00210859	2.00538	56.0129	169.596	3.5295	49.5264	2.25035	5.69204	8.19547		067_23CR01B	999		0.15704	0.151495
069_23CR01B	999		0.136523	0.121259	0.000793961	1.88977	49.8753	160.65	3.18803	55.0274	2.12061	6.70133	14.7982		069_23CR01B	999		0.119447	0.121259	0.000968889	1.88977	49.9737	160.953	3.17906	58.355	2.12061	6.70133	14.7982		069_23CR01B	999		0.102371	0.121259	0.0011439	1.88977	50.072	161.256	3.17122	62.0953	2.12061	6.70133	14.7982		069_23CR01B	999		0.0682177	0.121259
070_23CR01B	999		0.149907	0.00976956	0.000993497	1.8604	47.7174	156.313	3.33201	51.6001	2.08766	81.8843	2516.4		070_23CR01B	999		0.132831	0.00976956	0.00116842	1.8604	47.8158	156.622	3.32216	54.662	2.08766	81.8843	2516.4		070_23CR01B	999		0.115755	0.00976956	0.00134343	1.8604	47.9141	156.93	3.31343	58.095	2.08766	81.8843	2516.4		070_23CR01B	999		0.0816018	0.00976956
071_23CR01B	999		0.178444	0.103216	0.00206052	1.81956	45.2176	151.645	3.51044	45.9083	2.04183	7.58033	20.964		071_23CR01B	999		0.161368	0.103216	0.00223545	1.81956	45.3159	151.961	3.49866	48.4686	2.04183	7.58033	20.964		071_23CR01B	999		0.144292	0.103216	0.00241046	1.81956	45.4142	152.277	3.48801	51.3181	2.04183	7.58033	20.964		071_23CR01B	999		0.110139	0.103216
072_23CR01B	999		0.127267	0.245532	0.000387684	1.73638	41.3286	145.49	3.47975	52.0992	1.94849	3.04093	3.75931		072_23CR01B	999		0.11019	0.245532	0.000562612	1.73638	41.427	145.823	3.47049	55.7362	1.94849	3.04093	3.75931		072_23CR01B	999		0.0931139	0.245532	0.000737622	1.73638	41.5253	146.155	3.46248	59.8978	1.94849	3.04093	3.75931		072_23CR01B	999		0.0589611	0.245532
074_23CR01B	999		0.107986	0.223377	0.00103067	1.70052	38.9064	140.061	2.03417	54.6836	1.90825	3.27349	3.89321		074_23CR01B	999		0.0909098	0.223377	0.0012056	1.70052	39.0047	140.402	2.02082	58.9656	1.90825	3.27349	3.89321		074_23CR01B	999		0.0738335	0.223377	0.00138061	1.70052	39.103	140.743	2.00969	63.9479	1.90825	3.27349	3.89321		074_23CR01B	999		0.0396807	0.223377
075_23CR01B	999		0.102548	0.0383044	0	1.6532	36.4877	135.293	1.72154	54.3733	1.85515	18.5586	153.754		075_23CR01B	999		0.0854718	0.0383044	0	1.6532	36.586	135.644	1.70583	58.9091	1.85515	18.5586	153.754		075_23CR01B	999		0.0683955	0.0383044	0.000169798	1.6532	36.6844	135.995	1.69289	64.2391	1.85515	18.5586	153.754		075_23CR01B	999		0.0342427	0.0383044
076_23CR01B	999		0.103156	0.464813	0.000129583	1.65666	35.6032	131.862	1.97072	53.6171	1.85903	1.53258	1.092		076_23CR01B	999		0.0860791	0.464813	0.000304512	1.65666	35.7016	132.214	1.95673	58.1433	1.85903	1.53258	1.092		076_23CR01B	999		0.0690028	0.464813	0.000479521	1.65666	35.7999	132.565	1.94519	63.4718	1.85903	1.53258	1.092		076_23CR01B	999		0.0348499	0.464813
084_23CR01B	999		0.0923753	0.00619414	0.000773893	1.4858	29.7653	123.212	1.94665	51.9047	1.6673	103.145	4227.86		084_23CR01B	999		0.0752988	0.00619414	0.000948821	1.4858	29.8637	123.605	1.93093	57.0503	1.6673	103.145	4227.86		084_23CR01B	999		0.0582225	0.00619414	0.00112383	1.4858	29.962	123.999	1.91831	63.2828	1.6673	103.145	4227.86		084_23CR01B	999		0.0240697	0.00619414
085_23CR01B	999		0.0919259	0.134048	0.0015225	1.48129	29.0216	120.586	1.95653	51.3945	1.66224	4.7517	9.55011		085_23CR01B	999		0.0748495	0.134048	0.00169743	1.48129	29.1199	120.982	1.94089	56.5784	1.66224	4.7517	9.55011		085_23CR01B	999		0.0577732	0.134048	0.00187244	1.48129	29.2182	121.377	1.92837	62.8778	1.66224	4.7517	9.55011		085_23CR01B	999		0.0236203	0.134048
086_23CR01B	999		0.0873347	0.290623	0	1.46196	26.7327	112.787	2.01256	50.6218	1.64054	2.16309	1.65896		086_23CR01B	999		0.0702584	0.290623	0	1.46196	26.831	113.189	1.99755	56.1217	1.64054	2.16309	1.65896		086_23CR01B	999		0.0531822	0.290623	3.90807e-06	1.46196	26.9293	113.591	1.9857	62.9062	1.64054	2.16309	1.65896		086_23CR01B	999		0.0190293	0.290623
087_23CR01B	999		0.115368	0.114038	0.00049392	1.41977	25.9881	112.901	2.12038	43.0027	1.5932	5.35346	13.6796		087_23CR01B	999		0.0982917	0.114038	0.000668848	1.41977	26.0864	113.315	2.09996	47.0589	1.5932	5.35346	13.6796		087_23CR01B	999		0.0812154	0.114038	0.000843858	1.41977	26.1847	113.729	2.08263	51.9192	1.5932	5.35346	13.6796		087_23CR01B	999		0.0470625	0.114038
089_23CR01B	999		0.0859339	0.248099	0	1.38751	24.5505	109.245	2.09285	48.8974	1.557	2.40481	2.72208		089_23CR01B	999		0.0688576	0.248099	0	1.38751	24.6488	109.669	2.07698	54.5229	1.557	2.40481	2.72208		089_23CR01B	999		0.0517813	0.248099	0	1.38751	24.747	110.094	2.06449	61.5474	1.557	2.40481	2.72208		089_23CR01B	999		0.0176287	0.248099
090_23CR01B	999		0.0844815	0.180547	0.000470599	1.36105	23.8434	108.192	2.31565	48.5931	1.52731	3.24156	5.12513		090_23CR01B	999		0.0674051	0.180547	0.000645527	1.36105	23.9417	108.625	2.30091	54.3298	1.52731	3.24156	5.12513		090_23CR01B	999		0.0503288	0.180547	0.000820537	1.36105	24.04	109.058	2.28936	61.5348	1.52731	3.24156	5.12513		090_23CR01B	999		0.0161759	0.180547
091_23CR01B	999		0.0849679	0.0213656	0.00107797	1.34234	23.6343	108.722	1.9752	48.2298	1.50631	27.0158	406.312		091_23CR01B	999		0.0678915	0.0213656	0.0012529	1.34234	23.7326	109.162	1.95766	53.9335	1.50631	27.0158	406.312		091_23CR01B	999		0.0508152	0.0213656	0.00142791	1.34234	23.8309	109.6	1.94393	61.0995	1.50631	27.0158	406.312		091_23CR01B	999		0.0166623	0.0213656
092_23CR01B	999		0.0870901	0.155516	0	1.30808	22.4656	106.129	1.87917	46.351	1.46787	3.61684	6.92768		092_23CR01B	999		0.0700138	0.155516	0	1.30808	22.5639	106.58	1.85905	51.9088	1.46787	3.61684	6.92768		092_23CR01B	999		0.0529375	0.155516	7.32577e-05	1.30808	22.6622	107.031	1.84315	58.9113	1.46787	3.61684	6.92768		092_23CR01B	999		0.0187846	0.155516
094_23CR01B	999		0.0726068	-0.0975828	0	1.27331	21.6945	105.309	2.13503	50.0183	1.42885	-5.61084	14.6718		094_23CR01B	999		0.0555305	-0.0975828	0	1.27331	21.7928	105.773	2.1198	56.7919	1.42885	-5.61084	14.6718		094_23CR01B	999		0.0384542	-0.0975828	8.65115e-05	1.27331	21.8911	106.236	2.10854	65.5951	1.42885	-5.61084	14.6718		094_23CR01B	999		0.00430137	-0.0975828
095_23CR01B	999		0.0725219	0.114007	0.000698653	1.25999	20.8666	102.442	1.88979	49.075	1.4139	4.75227	11.7295		095_23CR01B	999		0.0554455	0.114007	0.000873581	1.25999	20.9649	102.911	1.87212	55.877	1.4139	4.75227	11.7295		095_23CR01B	999		0.0383692	0.114007	0.00104859	1.25999	21.0633	103.381	1.85903	64.7705	1.4139	4.75227	11.7295		095_23CR01B	999		0.00421631	0.114007
096_23CR01B	999		0.0746742	0.182778	0.000907783	1.22418	20.0905	101.542	2.18919	47.3986	1.37372	2.87998	4.34661		096_23CR01B	999		0.0575978	0.182778	0.00108271	1.22418	20.1888	102.025	2.1723	54.0006	1.37372	2.87998	4.34661		096_23CR01B	999		0.0405215	0.182778	0.00125772	1.22418	20.2871	102.508	2.15962	62.6411	1.37372	2.87998	4.34661		096_23CR01B	999		0.00636864	0.182778
097_23CR01B	999		0.0707816	0.0660171	0	1.21886	19.0667	96.9117	2.18745	47.4292	1.36774	7.93896	34.1307		097_23CR01B	999		0.0537053	0.0660171	0	1.21886	19.165	97.3984	2.17144	54.4455	1.36774	7.93896	34.1307		097_23CR01B	999		0.036629	0.0660171	0	1.21886	19.2633	97.8847	2.1597	63.785	1.36774	7.93896	34.1307		097_23CR01B	999		0.0024763	0.0660171
099_23CR01B	999		0.0638584	-0.0671691	0	1.18509	18.7828	98.1551	2.08593	49.625	1.32986	-7.58666	29.9386		099_23CR01B	999		0.0467821	-0.0671691	1.94647e-05	1.18509	18.8811	98.6552	2.07016	57.4778	1.32986	-7.58666	29.9386		099_23CR01B	999		0.0297058	-0.0671691	0.000194475	1.18509	18.9794	99.1552	2.05913	68.1502	1.32986	-7.58666	29.9386		099_23CR01B	999		-0.00444707	-0.0671691
100_23CR01B	999		0.0785272	-0.0374303	0	1.18322	18.4967	96.8482	2.38293	44.0998	1.32775	-13.5928	112.83		100_23CR01B	999		0.0614509	-0.0374303	0	1.18322	18.595	97.3495	2.36522	50.3346	1.32775	-13.5928	112.83		100_23CR01B	999		0.0443747	-0.0374303	0	1.18322	18.6933	97.8505	2.35167	58.5211	1.32775	-13.5928	112.83		100_23CR01B	999		0.010222	-0.0374303
101_23CR01B	999		0.064188	-0.0178477	0	1.11695	17.1462	95.1483	2.55812	47.2203	1.25339	-26.9103	360.634		101_23CR01B	999		0.0471117	-0.0178477	0	1.11695	17.2445	95.6798	2.5433	55.0747	1.25339	-26.9103	360.634		101_23CR01B	999		0.0300355	-0.0178477	0	1.11695	17.3428	96.211	2.53287	65.9143	1.25339	-26.9103	360.634		101_23CR01B	999		-0.00411723	-0.0178477
102_23CR01B	999		0.0624444	-0.0391074	0	1.10555	16.8695	94.5921	2.24876	47.5011	1.2406	-12.1559	92.8964		102_23CR01B	999		0.0453681	-0.0391074	0	1.10555	16.9678	95.1293	2.23224	55.6068	1.2406	-12.1559	92.8964		102_23CR01B	999		0.0282919	-0.0391074	1.25924e-05	1.10555	17.066	95.6661	2.2208	66.8894	1.2406	-12.1559	92.8964		102_23CR01B	999		-0.005861	-0.0391074
104_23CR01B	999		0.0583586	0.258752	0.00106199	1.07408	16.0494	92.6787	2.12679	47.946	1.20529	1.78494	2.09669		104_23CR01B	999		0.0412821	0.258752	0.00123691	1.07408	16.1477	93.2323	2.10984	56.7107	1.20529	1.78494	2.09669		104_23CR01B	999		0.0242058	0.258752	0.00141192	1.07408	16.246	93.7856	2.0986	69.209	1.20529	1.78494	2.09669		104_23CR01B	999		-0.00994702	0.258752
105_23CR01B	999	4	0.0569424	0.271484	0	1.06632	15.4554	89.9657	2.40714	47.618	1.19658	1.68893	1.86816		105_23CR01B	999	4	0.039866	0.271484	0	1.06632	15.5537	90.524	2.39203	56.6474	1.19658	1.68893	1.86816		105_23CR01B	999	4	0.0227898	0.271484	0	1.06632	15.652	91.082	2.38207	69.6975	1.19658	1.68893	1.86816		105_23CR01B	999	4	-0.011363	0.271484
106_23CR01B	999	4	0.054769	0.0583809	0	1.03237	15.0347	90.3847	1.99272	47.9004	1.15848	7.60382	33.4663		106_23CR01B	999	4	0.0376927	0.0583809	0	1.03237	15.133	90.9612	1.9745	57.3493	1.15848	7.60382	33.4663		106_23CR01B	999	4	0.0206164	0.0583809	1.59234e-05	1.03237	15.2313	91.5375	1.96291	71.2161	1.15848	7.60382	33.4663		106_23CR01B	999	4	-0.0135364	0.0583809
107_23CR01B	999	4	0.0567101	0.0540158	0	1.02158	14.4671	87.9501	2.3872	46.0745	1.14637	8.13239	48.1544		107_23CR01B	999	4	0.0396338	0.0540158	0	1.02158	14.5654	88.5335	2.37068	55.1733	1.14637	8.13239	48.1544		107_23CR01B	999	4	0.0225576	0.0540158	0	1.02158	14.6637	89.1166	2.35982	68.524	1.14637	8.13239	48.1544		107_23CR01B	999	4	-0.0115951	0.0540158
109_23CR01B	999	4	0.0533708	0.0806553	0.000188386	0.995836	14.2465	88.8261	2.4181	47.2023	1.11748	5.30913	17.0834		109_23CR01B	999	4	0.0362944	0.0806553	0.000363314	0.995836	14.3448	89.4245	2.40223	56.9652	1.11748	5.30913	17.0834		109_23CR01B	999	4	0.0192181	0.0806553	0.000538324	0.995836	14.4431	90.0225	2.39226	71.5653	1.11748	5.30913	17.0834		109_23CR01B	999	4	-0.0149348	0.0806553
110_23CR01B	999	4	0.053829	-0.118289	0	0.985078	13.9394	87.8838	2.12885	46.4471	1.10541	-3.58091	8.74236		110_23CR01B	999	4	0.0367526	-0.118289	0	0.985078	14.0378	88.4888	2.1103	56.1253	1.10541	-3.58091	8.74236		110_23CR01B	999	4	0.0196764	-0.118289	2.57683e-05	0.985078	14.136	89.0935	2.09858	70.6397	1.10541	-3.58091	8.74236		110_23CR01B	999	4	-0.0144765	-0.118289
111_23CR01B	999	4	0.0577266	0.317084	0	0.976156	13.407	85.3588	2.77632	43.7527	1.0954	1.32377	1.17307		111_23CR01B	999	4	0.0406503	0.317084	0	0.976156	13.5053	85.9703	2.76015	52.6673	1.0954	1.32377	1.17307		111_23CR01B	999	4	0.0235741	0.317084	0	0.976156	13.6036	86.5813	2.74934	65.9002	1.0954	1.32377	1.17307		111_23CR01B	999	4	-0.0105786	0.317084
112_23CR01B	999	4	0.0674163	0.185405	0.000616452	0.967226	13.383	85.9779	2.83592	39.9354	1.08538	2.24324	3.98578		112_23CR01B	999	4	0.0503398	0.185405	0.000791381	0.967226	13.4813	86.595	2.81672	47.2836	1.08538	2.24324	3.98578		112_23CR01B	999	4	0.0332635	0.185405	0.00096639	0.967226	13.5796	87.2116	2.80284	57.7571	1.08538	2.24324	3.98578		112_23CR01B	999	4	-0.000889336	0.185405
114_23CR01B	999	4	0.0520744	0.195369	0.000218351	0.944596	12.8004	84.2451	2.75248	45.1535	1.05998	2.07902	2.7754		114_23CR01B	999	4	0.034998	0.195369	0.00039328	0.944596	12.8987	84.8775	2.73706	55.2442	1.05998	2.07902	2.7754		114_23CR01B	999	4	0.0179217	0.195369	0.000568289	0.944596	12.997	85.5095	2.72742	70.8341	1.05998	2.07902	2.7754		114_23CR01B	999	4	-0.0162312	0.195369
115_23CR01B	999	4	0.0557755	0.0836258	0	0.935598	12.6993	84.3805	2.97055	43.2648	1.04989	4.8108	18.8369		115_23CR01B	999	4	0.0386991	0.0836258	8.32663e-05	0.935598	12.7976	85.0188	2.95457	52.5517	1.04989	4.8108	18.8369		115_23CR01B	999	4	0.0216228	0.0836258	0.000258276	0.935598	12.8959	85.6569	2.94406	66.6372	1.04989	4.8108	18.8369		115_23CR01B	999	4	-0.0125301	0.0836258
116_23CR01B	999	4	0.0551112	0.225418	0	0.924343	12.5575	84.4525	2.54887	43.2833	1.03726	1.76325	2.47616		116_23CR01B	999	4	0.0380349	0.225418	0	0.924343	12.6558	85.0985	2.53044	52.7054	1.03726	1.76325	2.47616		116_23CR01B	999	4	0.0209587	0.225418	0	0.924343	12.754	85.7441	2.51853	67.0833	1.03726	1.76325	2.47616		116_23CR01B	999	4	-0.0131941	0.225418
117_23CR01B	999	4	0.0497815	-0.00683728	0	0.894873	12.3311	85.6335	2.38978	45.3439	1.00419	-56.279	3629.33		117_23CR01B	999	4	0.0327052	-0.00683728	2.15923e-05	0.894873	12.4294	86.3004	2.37142	56.0019	1.00419	-56.279	3629.33		117_23CR01B	999	4	0.0156289	-0.00683728	0.000196602	0.894873	12.5277	86.967	2.36047	72.8583	1.00419	-56.279	3629.33		117_23CR01B	999	4	-0.018524	-0.00683728
119_23CR01B	999	4	0.0500686	0.25836	0	0.870782	11.8315	84.4641	2.30552	44.1791	0.977152	1.44928	1.92198		119_23CR01B	999	4	0.0329922	0.25836	4.94134e-05	0.870782	11.9298	85.1499	2.28536	54.7723	0.977152	1.44928	1.92198		119_23CR01B	999	4	0.0159159	0.25836	0.000224423	0.870782	12.0281	85.8354	2.27333	71.6782	0.977152	1.44928	1.92198		119_23CR01B	999	4	-0.0182369	0.25836
120_23CR01B	999	4	0.0509	-0.0243116	0	0.879971	11.5982	81.9901	2.81659	43.2839	0.987463	-15.5641	222.068		120_23CR01B	999	4	0.0338237	-0.0243116	0	0.879971	11.6965	82.6696	2.79975	53.6644	0.987463	-15.5641	222.068		120_23CR01B	999	4	0.0167475	-0.0243116	0	0.879971	11.7948	83.3486	2.78946	70.2252	0.987463	-15.5641	222.068		120_23CR01B	999	4	-0.0174052	-0.0243116
121_23CR01B	999	4	0.0525238	0.0863453	0	0.860815	11.5468	83.4108	2.7156	42.4063	0.965968	4.28686	15.0484		121_23CR01B	999	4	0.0354475	0.0863453	3.25329e-05	0.860815	11.6452	84.1049	2.69653	52.387	0.965968	4.28686	15.0484		121_23CR01B	999	4	0.0183711	0.0863453	0.000207543	0.860815	11.7435	84.7987	2.68453	68.1607	0.965968	4.28686	15.0484		121_23CR01B	999	4	-0.0157817	0.0863453
122_23CR01B	999	4	0.0500884	-0.0564098	0	0.840885	10.9832	81.2674	2.53323	42.3435	0.943603	-6.40989	38.1842		122_23CR01B	999	4	0.033012	-0.0564098	4.01031e-05	0.840885	11.0815	81.9788	2.51327	52.9246	0.943603	-6.40989	38.1842		122_23CR01B	999	4	0.0159357	-0.0564098	0.000215113	0.840885	11.1798	82.6898	2.50127	70.1443	0.943603	-6.40989	38.1842		122_23CR01B	999	4	-0.0182172	-0.0564098
123_23CR01B	999	4	0.0496444	0.0991478	0.000614734	0.84008	10.9714	81.2581	2.74035	42.5347	0.9427	3.64339	12.8027		123_23CR01B	999	4	0.032568	0.0991478	0.000789662	0.84008	11.0697	81.9703	2.72192	53.2353	0.9427	3.64339	12.8027		123_23CR01B	999	4	0.0154917	0.0991478	0.000964672	0.84008	11.168	82.6821	2.71088	70.7108	0.9427	3.64339	12.8027		123_23CR01B	999	4	-0.0186612	0.0991478
		S	41.3495	31.1484	0.293294	89.1143	13761										S	40.4957	31.1484	0.298263	89.1143	13765.9										S	39.6419	31.1484	0.304426	89.1143	13770.8										S	37.9342	31.1484
Information on Analysis				Results		40(r)/39(k)	± 2s	Age	± 2s	MSWD	39Ar(k)	K/Ca	± 2s		Information on Analysis				Results		40(r)/39(k)	± 2s	Age	± 2s	MSWD	39Ar(k)	K/Ca	± 2s		Information on Analysis				Results		40(r)/39(k)	± 2s	Age	± 2s	MSWD	39Ar(k)	K/Ca	± 2s		Information on Analysis				Results
								(Ma)			(%,n)												(Ma)			(%,n)												(Ma)			(%,n)
Sample = 003_23CR01B				Age Plateau Error Mean		13.8204	0.245733	85.8806	1.49546	5.69382	16.8733	1.53652	0.773434		Sample = 003_23CR01B				Age Plateau Error Mean		13.9253	0.242066	86.5168	1.47281	5.60217	16.8733	1.53652	0.773434		Sample = 003_23CR01B				Age Plateau Error Mean		14.03	0.238378	87.1525	1.45004	5.47943	16.8733	1.53652	0.773434		Sample = 003_23CR01B				Age Plateau Error Mean
Material = Quartz							0.0177804		0.0174133	7.07322e-12	16				Material = Quartz							0.0173832		0.0170233	1.2692e-11	16				Material = Quartz							0.0169905		0.0166379	2.76989e-11	16				Material = Quartz
Location = R1 Rursee				Full External Error					2.31443	1.7303	2σ Confidence Limit				Location = R1 Rursee				Full External Error					2.30974	1.7303	2σ Confidence Limit				Location = R1 Rursee				Full External Error					2.30525	1.7303	2σ Confidence Limit				Location = R1 Rursee				Full External Error
Analyst = Klaudia Kuiper				Analytical Error					1.49172	2.38617	Error Magnification				Analyst = Klaudia Kuiper				Analytical Error					1.46895	2.36689	Error Magnification				Analyst = Klaudia Kuiper				Analytical Error					1.44607	2.34082	Error Magnification				Analyst = Klaudia Kuiper				Analytical Error
Project = VU123															Project = VU123															Project = VU123															Project = VU123
Mass Discrimination Law = LIN				Total Fusion Age		154.42	0.282289	786.443	1.41938		83	1.23021	0.110962		Mass Discrimination Law = LIN				Total Fusion Age		154.475	0.282244	786.671	1.41921		83	1.23021	0.110962		Mass Discrimination Law = LIN				Total Fusion Age		154.53	0.282209	786.899	1.41908		83	1.23021	0.110962		Mass Discrimination Law = LIN				Total Fusion Age
Irradiation = VU123							0.00182806		0.00180481						Irradiation = VU123							0.00182712		0.00180407						Irradiation = VU123							0.00182624		0.00180338						Irradiation = VU123
J = 0.00347370 ± 0.00000219				Full External Error					14.1947						J = 0.00347370 ± 0.00000219				Full External Error					14.1982						J = 0.00347370 ± 0.00000219				Full External Error					14.2017						J = 0.00347370 ± 0.00000219				Full External Error
FCs = 28.201 ± 0.023 Ma				Analytical Error					1.16867						FCs = 28.201 ± 0.023 Ma				Analytical Error					1.16834						FCs = 28.201 ± 0.023 Ma				Analytical Error					1.16804						FCs = 28.201 ± 0.023 Ma				Analytical Error
[truncated: 23 more columns]

## Sheet: Figures
Line blank
																														Results		40(a)/36(a)	± 2s	40(r)/39(k)	± 2s	Age	± 2s	MSWD	39Ar(k)	K/Ca	± 2s
																																				(Ma)			(%,n)
																														Age Plateau Error Mean				13.8204	0.245733	85.8806	1.49546	5.69382	16.8733	1.53652	0.773434
																																			0.0177804		0.0174133	7.07322e-12	16
																														Full External Error							2.31443	1.7303	2σ Confidence Limit
																														Analytical Error							1.49172	2.38617	Error Magnification
																														Total Fusion Age				154.42	0.282289	786.443	1.41938		83	1.23021	0.110962
																																			0.00182806		0.00180481
																														Full External Error							14.1947
																														Analytical Error							1.16867
																														Normal Isochron Error Chron		264.545	59.7525	15.7359	3.43054	97.4714	20.6939	5.76188	16.8733
																																	0.225869		0.218007		0.212308	2.12838e-11	16
																														Full External Error							20.7904	1.75593	2σ Confidence Limit
																														Analytical Error							20.6936	2.40039	Error Magnification
																																					25		Number of Iterations
																																					0.000118201		Convergence
																														Inverse Isochron Error Chron		263.41	61.3693	15.8316	2.81608	98.0486	16.9822	5.73338	16.8733
																																	0.23298		0.177877		0.173201	2.52428e-11	16
																														Full External Error							17.1009	1.75593	2σ Confidence Limit
																														Analytical Error							16.9817	2.39445	Error Magnification
																																					4		Number of Iterations
																																					0.000138438		Convergence
																																					0.0705871		Spreading Factor
Line blank + 5fA 40Ar
																														Results		40(a)/36(a)	± 2s	40(r)/39(k)	± 2s	Age	± 2s	MSWD	39Ar(k)	K/Ca	± 2s
																																				(Ma)			(%,n)
																														Age Plateau Error Mean				13.9253	0.242066	86.5168	1.47281	5.60217	16.8733	1.53652	0.773434
																																			0.0173832		0.0170233	1.2692e-11	16
																														Full External Error							2.30974	1.7303	2σ Confidence Limit
																														Analytical Error							1.46895	2.36689	Error Magnification
																														Total Fusion Age				154.475	0.282244	786.671	1.41921		83	1.23021	0.110962
																																			0.00182712		0.00180407
																														Full External Error							14.1982
																														Analytical Error							1.16834
																														Normal Isochron Error Chron		321.154	76.9344	12.9947	3.02254	80.8613	18.399	5.8575	16.8733
																																	0.239556		0.232598		0.227538	1.19977e-11	16
																														Full External Error							18.4742	1.75593	2σ Confidence Limit
																														Analytical Error							18.3987	2.42023	Error Magnification
																																					23		Number of Iterations
																																					0.000116024		Convergence
																														Inverse Isochron Error Chron		316.699	83.1306	13.2233	2.45624	82.2521	14.9405	5.95243	16.8733
																																	0.262491		0.185751		0.181643	6.78073e-12	16
																														Full External Error							15.0361	1.75593	2σ Confidence Limit
																														Analytical Error							14.9402	2.43976	Error Magnification
																																					4		Number of Iterations
																																					6.26314e-06		Convergence
																																					0.0864263		Spreading Factor
Line blank + 10fA
																														Results		40(a)/36(a)	± 2s	40(r)/39(k)	± 2s	Age	± 2s	MSWD	39Ar(k)	K/Ca	± 2s
																																				(Ma)			(%,n)
																														Age Plateau Error Mean				14.03	0.238378	87.1525	1.45004	5.47943	16.8733	1.53652	0.773434
																																			0.0169905		0.0166379	2.76989e-11	16
																														Full External Error							2.30525	1.7303	2σ Confidence Limit
																														Analytical Error							1.44607	2.34082	Error Magnification
																														Total Fusion Age				154.53	0.282209	786.899	1.41908		83	1.23021	0.110962
																																			0.00182624		0.00180338
																														Full External Error							14.2017
																														Analytical Error							1.16804
																														Normal Isochron Error Chron		355.148	69.901	12.7703	1.48995	79.4945	9.07687	4.67701	16.8733
																																	0.196822		0.116673		0.114182	1.25671e-08	16
																														Full External Error							9.22335	1.75593	2σ Confidence Limit
																														Analytical Error							9.07634	2.16264	Error Magnification
																																					26		Number of Iterations
																																					0.00012616		Convergence
																														Inverse Isochron Error Chron		358.414	79.4532	12.7878	1.43901	79.6013	8.76605	4.84009	16.8733
																																	0.22168		0.112529		0.110125	4.89524e-09	16
																														Full External Error							8.91803	1.75593	2σ Confidence Limit
Line blank + 20 fA (-->36Ar signal <0, so not realistic)																														Analytical Error							8.7655	2.20002	Error Magnification
																																					4		Number of Iterations
																																					1.81771e-06		Convergence
																																					0.154167		Spreading Factor
																														Results		40(a)/36(a)	± 2s	40(r)/39(k)	± 2s	Age	± 2s	MSWD	39Ar(k)	K/Ca	± 2s
																																				(Ma)			(%,n)
																														Age Plateau Error Mean				14.2395	0.230947	88.4225	1.40424	5.14717	16.8733	1.53652	0.773434
																																			0.0162188		0.015881	2.25465e-10	16
																														Full External Error							2.29696	1.7303	2σ Confidence Limit
																														Analytical Error							1.40002	2.26874	Error Magnification
																														Total Fusion Age				154.641	0.282163	787.356	1.41889		83	1.23021	0.110962
																																			0.00182464		0.0018021
																														Full External Error							14.2087
																														Analytical Error							1.16756
																														Normal Isochron No Convergence		349.502	46.7536	15.1162	0.763932	93.7294	4.61904	2.48337	16.8733
																																	0.133772		0.0505374		0.0492806	0.00159119	16
																														Full External Error							5.00399	1.75593	2σ Confidence Limit
																														Analytical Error							4.6176	1.57587	Error Magnification
																																					100		Number of Iterations
																																					0.0481085		Convergence
																														Inverse Isochron Error Chron		354.655	40.5564	15.1	0.631179	93.6315	3.81711	2.31017	16.8733
																																	0.114355		0.0418		0.0407674	0.00358037	16
																														Full External Error							4.27401	1.75593	2σ Confidence Limit
																														Analytical Error							3.81538	1.51992	Error Magnification
																																					4		Number of Iterations
																																					2.77671e-05		Convergence
																																					1.10869		Spreading Factor
Line blank + 14.5 fA
																														Results		40(a)/36(a)	± 2s	40(r)/39(k)	± 2s	Age	± 2s	MSWD	39Ar(k)	K/Ca	± 2s
																																				(Ma)			(%,n)
																														Age Plateau Error Mean				14.1243	0.235043	87.7243	1.42947	5.34354	16.8733	1.53652	0.773434
																																			0.016641		0.016295	6.54867e-11	16
																														Full External Error							2.30141	1.7303	2σ Confidence Limit
																														Analytical Error							1.42539	2.31161	Error Magnification
																														Total Fusion Age				154.58	0.282184	787.105	1.41898		83	1.23021	0.110962
																																			0.00182549		0.00180278
																														Full External Error							14.2048
																														Analytical Error							1.16781
																														Normal Isochron Error Chron		369.765	48.7825	13.5026	0.306207	83.9501	1.86366	3.00839	16.8733
																																	0.131928		0.0226776		0.0221996	0.000118431	16
																														Full External Error							2.54109	1.75593	2σ Confidence Limit
																														Analytical Error							1.86079	1.73447	Error Magnification
																																					1		Number of Iterations
																																					3.93589e-06		Convergence
																														Inverse Isochron Error Chron		367.953	61.0132	13.8149	0.35533	85.8472	2.15966	3.76463	16.8733
																																	0.165818		0.0257207		0.025157	2.13553e-06	16
																														Full External Error							2.78961	1.75593	2σ Confidence Limit
																														Analytical Error							2.15707	1.94026	Error Magnification
																																					3		Number of Iterations
																																					5.36921e-05		Convergence
																																					0.324819		Spreading Factor

## Sheet: Summary
Scenario	Age (Ma)	± 2s	MSWD	40Ar/36Ar	± 2s	Inv iso age (Ma)	± 2s
Line blank	85.8806	1.49546	5.69382	263.41	61.3693	98.0486	16.9822
Line blank + 5fA 40Ar; 0.017fA 36Ar	86.5168	1.47281	5.60217	316.699	83.1306	82.2521	14.9405
Line blank + 10fA 40Ar; 0.033fA 36Ar	87.1525	1.45004	5.47943	358.414	79.4532	79.6013	8.76605
Line blank + 14.5fA 40Ar; 0.049fA 36Ar	87.7243	1.42947	5.34354	367.953	61.0132	85.8472	2.15966
Line blank + 20fA 40Ar; 0.067fA 36Ar*	88.4225	1.40424	5.14717	354.655	40.5564	93.6315	3.81711
*over correction of blank, 36Ar becomes negative, som real blank must have been lower than 20fA 40Ar
Conclusion: There is some affect of blank correction on ages, but age range remains the same.
Isochrons do change, but are difficult oto constrain as reflected in large uncertainties.
