# Supplementary material for: 40 Ar ∕ 39 Ar age constraints on the formation of fluid-rich quartz veins from the NW Rhenohercynian zone (Rursee area, Germany)
Source: Copernicus journal article supplement (doi:10.5194/gchron-7-173-2025), 2025-05-15
Supplement: Supplementary file 5 [file Supplement S2.xlsx]

## Sheet: Rursee K ppm estimation
1)	One quartz grain parameter			2)	Measurements of quartz grain 40Ar/39Ar analysis
		min	max					Total number of grain per analysis for cubic shape		Total number of grain per analysis for spheric shape
	Grain size (μm)	400	500			sample amount (µg)		for min size	for max size	for min size	for max size
	R (μm)	200	250		Rursee 1a BNV	46000		273.289	139.924	521.943	267.235
	Surface of sphere (μm2)	125664	196350		Rursee 1b BNV	23000		136.644	69.962	260.972	133.618
	Surface of cube (μm2)	160000	250000		Rursee 2 BPV	30000		178.232	91.2548	340.398	174.284
	Volume of sphere (μm3)	3.35103e+07	6.54498e+07		Rursee 2.1 BNV	22000		130.703	66.9202	249.625	127.808
	Volume of cube (μm3)	64000000	125000000		Rursee 3 BPV	30000		178.232	91.2548	340.398	174.284
	Density g/cm3	2.63	2.63		Rursee 4 BPV	31000		184.173	94.2966	351.745	180.093
	Mass of the spheric grain (μg)	88.1321	172.133		Rursee 5 BNV	32000		190.114	97.3384	363.091	185.903
	Mass of the cubic grain (μg)	168.32	328.75		Rursee 6 BPV	35000		207.937	106.464	397.131	203.331
3)	Estimation of % mineral inclusion in one grain
					K (ppm) from EPMA		% of mineral inclusion surface for cubic surface		% of mineral inclusion surface for spheric surface		~Volume of mineral inclusion one cubic quartz grain (μm3)		~Volume of mineral inclusion for one spheric quartz grain (μm3)
	Sample ID	Number of observed mineral inclusion in one single grain surface under EPMA	Estimated size of inclusion (μm)	Total surface of mineral inclusion estimated in grain (μm2)	min	max	max	min	max	min	min	max	min	max
	Rursee 1a BNV	10	10	1000	4000	28000	0.00625	0.004	0.00795775	0.00509296	400000	500000	266667	333333
	Rursee 1b BNV	10	10	1000	4000	28000	0.00625	0.004	0.00795775	0.00509296	400000	500000	266667	333333
	Rursee 2 BPV	8	20	3200	100	5000	0.02	0.0128	0.0254648	0.0162975	1280000	1600000	853333	1.06667e+06
	Rursee 2.1 BNV	6	10	600	100	28000	0.00375	0.0024	0.00477465	0.00305577	240000	300000	160000	200000
	Rursee 3 BPV	30	5	750	1000	15000	0.0046875	0.003	0.00596831	0.00381972	300000	375000	200000	250000
	Rursee 4 BPV	4	10	400	100	13000	0.0025	0.0016	0.0031831	0.00203718	160000	200000	106667	133333
	Rursee 5 BNV	2	50	5000	4000	75000	0.03125	0.02	0.0397887	0.0254648	2000000	2500000	1.33333e+06	1.66667e+06
	Rursee 6 BPV	6	10	600	200	20000	0.00375	0.0024	0.00477465	0.00305577	240000	300000	160000	200000
4)			Total accumulated estimation of K (μg) from mineral inclusion contribute to 40Ar/39Ar analysis				Total accumulated estimation of 40K (μg) from mineral inclusion contribute to 40Ar/39Ar analysis
			For cubic shape quartz grains		For spheric shape quartz grains		For cubic shape quartz grains		For spheric shape quartz grains
		sample amount (mg)	min	max	min	max	min	max	min	max
	Rursee 1a BNV	46	1.15	5.152	1.46423	6.55973	0.0138	0.061824	0.0175707	0.0787168
	Rursee 1b BNV	25	0.575	2.576	0.732113	3.27987	0.0069	0.030912	0.00878535	0.0393584
	Rursee 2 BPV	30	0.06	1.92	0.0763944	2.44462	0.00072	0.02304	0.000916732	0.0293354
	Rursee 2.1 BNV	22	0.00825	1.4784	0.0105042	1.88236	9.9e-05	0.0177408	0.000126051	0.0225883
	Rursee 3 BPV	30	0.140625	1.35	0.179049	1.71887	0.0016875	0.0162	0.00214859	0.0206265
	Rursee 4 BPV	31	0.00775	0.6448	0.00986761	0.820985	9.3e-05	0.0077376	0.000118411	0.00985182
	Rursee 5 BNV	32	4	48	5.09296	61.1155	0.048	0.576	0.0611155	0.733386
	Rursee 6 BPV	35	0.02625	1.68	0.0334225	2.13904	0.000315	0.02016	0.00040107	0.0256685
5)				λ	5.543e-10	yr-1
	40K	39.964	g/mol	λe	5.81e-11	yr-1				sensitivity Helix	3.5e-16	mol/fA
	Total accumulated estimation of 40K (mol) from mineral inclusion contribute to 40Ar/39Ar analysis				Assume age in Ma of	Total accumulated estimation of 40Ar* (mol) from mineral inclusion contribute to 40Ar/39Ar analysis				Total accumulated estimation of 40Ar* (fA) from mineral inclusion contribute to 40Ar/39Ar analysis
	For cubic shape quartz grains		For spheric shape quartz grains			For cubic shape quartz grains		For spheric shape quartz grains		For cubic shape quartz grains		For spheric shape quartz grains
	min	max	min	max		min	max	min	max	min	max	min	max
	3.45311e-10	1.54699e-09	4.39663e-10	1.96969e-09		0	0	0	0	0	0	0	0
	1.72655e-10	7.73496e-10	2.19832e-10	9.84846e-10	84	8.62552e-13	3.86423e-12	1.09824e-12	4.9201e-12	2464.44	11040.7	3137.82	14057.4
	1.80162e-11	5.76519e-10	2.2939e-11	7.34047e-10	97	1.04313e-13	3.33802e-12	1.32816e-13	4.2501e-12	298.038	9537.2	379.473	12143.1
	2.47723e-12	4.4392e-10	3.15411e-12	5.65216e-10	144	2.15751e-14	3.86626e-12	2.74703e-14	4.92267e-12	61.6431	11046.4	78.4865	14064.8
	4.22255e-11	4.05365e-10	5.37632e-11	5.16127e-10	559	1.60762e-12	1.54331e-11	2.04688e-12	1.96501e-11	4593.19	44094.6	5848.23	56143
	2.32709e-12	1.93614e-10	2.96295e-12	2.46517e-10	129	1.808e-14	1.50426e-12	2.30202e-14	1.91528e-12	51.6573	4297.88	65.7721	5472.24
	1.20108e-09	1.4413e-08	1.52926e-09	1.83512e-08	192	1.41372e-11	1.69647e-10	1.80001e-11	2.16001e-10	40392.1	484705	51428.8	617146
	7.88209e-12	5.04454e-10	1.00358e-11	6.42291e-10	200	9.68597e-14	6.19902e-12	1.23326e-13	7.89284e-12	276.742	17711.5	352.359	22551
6)		Estimation		40* from experiment 20 and up fA	sample amount (mg)*
		min	max
	Rursee 1b BNV	2464.44	11040.7	4644	25
	Rursee 2 BPV	298.038	9537.2	5377	30
	Rursee 2.1 BNV	61.6431	11046.4	2338	22
	Rursee 3 BPV	4593.19	44094.6	1779	30
	Rursee 4 BPV	51.6573	4297.88	6576	31
	Rursee 5 BNV	40392.1	484705	4648	32
	Rursee 6 BPV	276.742	17711.5	4460	35
7)	Estimation of K in crystal lattice of quartz grain of Rursee samples
				~Volume of one spheric grain without mineral inclusion (μm3) (total grain volume - mineral inclusion volume)		~Volume of one cubic grain without mineral inclusion (μm3) (total grain volume - mineral inclusion volume)		Estimated of K (μg) in total spheric quartz grain which involve for 40Ar/39Ar analysis		Estimated of K (μg) in total cubic quartz grain which involve for 40Ar/39Ar analysis		Estimated 40K (μg) in total spheric quartz grain which involve for 40Ar/39Ar analysis		Estimated of 40K (μg) in total cubic quartz grain which involve for 40Ar/39Ar analysis
		Grain ID	K (ppm)	min	max	min	max	min	max	min	max	min	max	min	max
	Bedding Normal Veins	AH2.1_04	37.06	3.33103e+07	6.52898e+07	63700000	124700000	0.810454	0.813327	0.811498	0.813363	0.00972545	0.00975992	0.00973798	0.00976036
		AH2.1_07	100					2.18687	2.19462	2.18969	2.19472	0.0262424	0.0263355	0.0262762	0.0263366
		AH2.1_09	124.19					2.71587	2.7255	2.71937	2.72562	0.0325905	0.032706	0.0326325	0.0327075
	Bedding Parallel Veins	AH2_05	29.98	3.24437e+07	6.45965e+07	62400000	123720000	0.870771	0.887674	0.876915	0.89019	0.0104493	0.0106521	0.010523	0.0106823
		AH2_06	122.43					3.55599	3.62501	3.58108	3.63529	0.0426719	0.0435002	0.0429729	0.0436235
			Total accumulated estimation of 40K (mol) from crystal lattice contribute to 40Ar/39Ar analysis				Total accumulated estimation of 40Ar* (mol) from crystal lattice contribute to 40Ar/39Ar analysis				Total accumulated estimation of 40Ar* (fA) from crystal lattice contribute to 40Ar/39Ar analysis
			For spheric shape quartz grains		For cubic shape quartz grains		For spheric shape quartz grains		For cubic shape quartz grains		For spheric shape quartz grains		For cubic shape quartz grains
			min	max	min	max	min	max	min	max	min	max	min	max
	Bedding Normal Veins	AH2.1_04	2.43355e-10	2.44218e-10	2.43669e-10	2.44229e-10	2.11947e-12	2.12698e-12	2.1222e-12	2.12708e-12	6055.63	6077.09	6063.43	6077.36
		AH2.1_07	6.56652e-10	6.5898e-10	6.57498e-10	6.59009e-10	5.71902e-12	5.73929e-12	5.72639e-12	5.73955e-12	16340.1	16398	16361.1	16398.7
		AH2.1_09	8.15496e-10	8.18387e-10	8.16547e-10	8.18423e-10	7.10245e-12	7.12763e-12	7.1116e-12	7.12795e-12	20292.7	20364.7	20318.9	20365.6
	Bedding Parallel Veins	AH2_05	2.61467e-10	2.66542e-10	2.63311e-10	2.67298e-10	1.51388e-12	1.54327e-12	1.52456e-12	1.54764e-12	4325.38	4409.34	4355.89	4421.84
		AH2_06	1.06776e-09	1.08848e-09	1.07529e-09	1.09157e-09	6.18227e-12	6.30228e-12	6.22589e-12	6.32014e-12	17663.6	18006.5	17788.3	18057.5
